# Supplementary material for: Transcriptome Analysis Provides Insights into Water Immersion Promoting the Decocooning of Osmia excavata Alfken
Source: MDPI journal article supplement (doi:10.3390/insects15040288), 2024-04-18
Supplement: s1 [file s1]

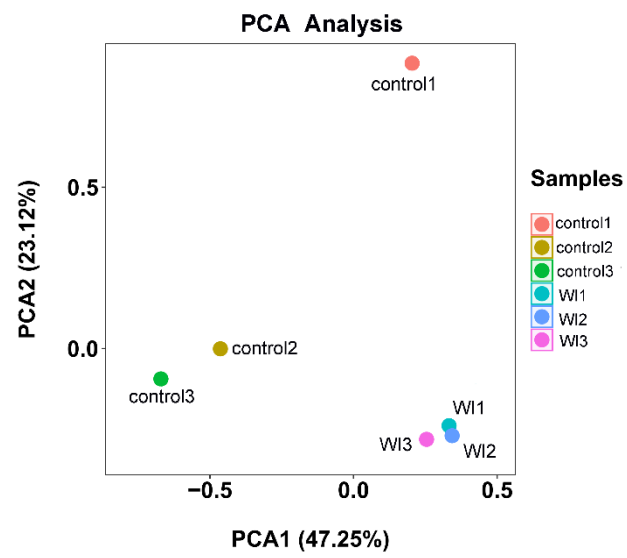

**Figure S2.** Principal component analysis (PCA) of all 6 samples from WI and control group. control1-control3: three replicates of the control group; WI1-WI3: three replicates of the WI group.
