# Supplementary material for: Transcriptome Analysis Provides Insights into Water Immersion Promoting the Decocooning of Osmia excavata Alfken
Source: MDPI journal article supplement (doi:10.3390/insects15040288), 2024-04-18
Supplement: s1 [file s1]

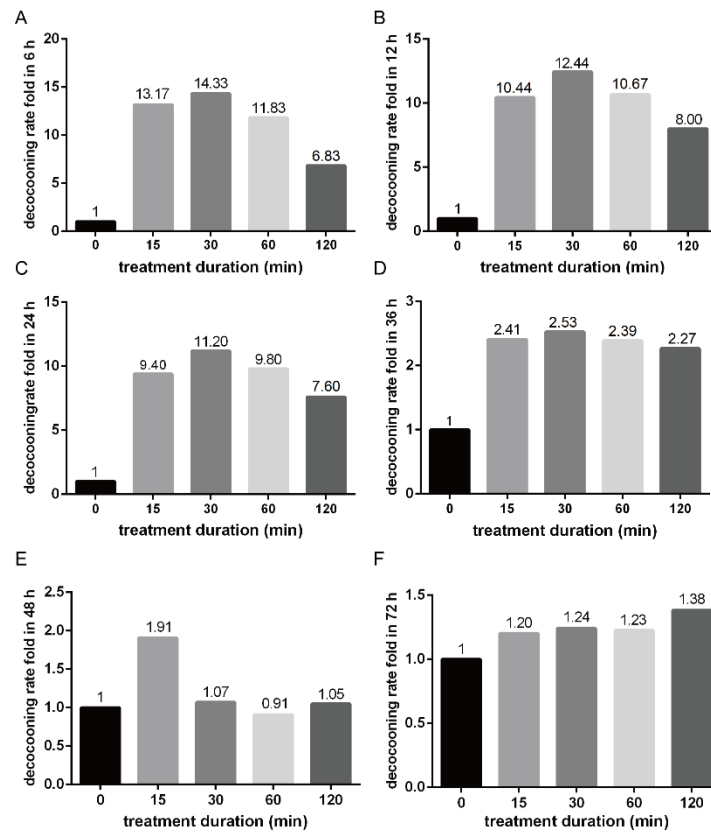

**Figure S1.** The relative fold changes to the decocooning rate of the groups exposed to WI for 15, 30, 60, and 120 min at 6 (A), 12 (B), 24 (C), 36 (D), 48 (E), and 72 h (F). 0: control group; 15: WI for 15 min; 30: WI for 30 min; 60: WI for 60 min; 120: WI for 120 min. The decocooning rate fold of the control group was set to 1.
