# Supplementary material for: Transcriptome Analysis Provides Insights into Water Immersion Promoting the Decocooning of Osmia excavata Alfken
Source: MDPI journal article supplement (doi:10.3390/insects15040288), 2024-04-18
Supplement: s1 [file s1]

**Table S1.** Quality control of transcriptome sequences.

| <b>Sample</b> | <b>Raw Reads</b> | <b>Raw Bases (G)</b> | <b>Valid Reads</b> | <b>Valid Bases (G)</b> | <b>Valid (%)</b> | <b>Q20%</b> | <b>Q30%</b> | <b>GC%</b> |
|---------------|------------------|----------------------|--------------------|------------------------|------------------|-------------|-------------|------------|
| control1      | 35763154         | 5.36                 | 35035328           | 5.17                   | 97.96            | 97.52       | 92.53       | 41.67      |
| control2      | 39047244         | 5.86                 | 38226266           | 5.65                   | 97.90            | 97.67       | 93.05       | 42.57      |
| control3      | 42151520         | 6.32                 | 40595706           | 6.00                   | 96.31            | 97.72       | 93.16       | 44.65      |
| WI1           | 39582474         | 5.94                 | 38569092           | 5.69                   | 97.44            | 97.64       | 92.75       | 41.30      |
| WI2           | 39605364         | 5.94                 | 38426182           | 5.67                   | 97.02            | 97.73       | 92.97       | 41.06      |
| WI3           | 37972000         | 5.70                 | 36736678           | 5.42                   | 96.75            | 97.72       | 92.97       | 41.51      |

Note: Sample, sample name; Raw Reads, the number of reads in the offline data; Raw Bases, number of data bases to be dismantled; Valid Reads, number of valid reads; Valid Bases, number of bases of the valid data; Valid%, proportion of valid reads; Q20%, proportion of bases with mass values  $\geq 20$  (sequencing error rate  $< 0.01$ ); Q30%, proportion of bases with mass values  $\geq 30$  (sequencing error rate  $< 0.001$ ); GC%, GC content; control, control groups; WI, WI groups.
