# Supplementary material for: Transcriptome Analysis Provides Insights into Water Immersion Promoting the Decocooning of Osmia excavata Alfken
Source: Insects. 2024 Apr 18;15(4):288. doi: 10.3390/insects15040288 (PMC11049900; doi:10.3390/insects15040288)
Supplement: Supplementary file 1 [file insects-15-00288-s001.zip]

Archive with 7 entries (7 files):
- Supplementary Files-proofreading/~$Table S3 GO enrichment analysis.xlsx
- Supplementary Files-proofreading/Figure S1.pdf
- Supplementary Files-proofreading/Figure S2.pdf
- Supplementary Files-proofreading/Table S1.pdf
- Supplementary Files-proofreading/Table S2 Table of DEGs.xlsx
- Supplementary Files-proofreading/Table S3 GO enrichment analysis.xlsx
- Supplementary Files-proofreading/Table S4 KEGG enrichment analysis.xlsx
