# Supplementary material for: Transcriptome Analysis Provides Insights into Water Immersion Promoting the Decocooning of Osmia excavata Alfken
Source: Insects. 2024 Apr 18;15(4):288. doi: 10.3390/insects15040288 (PMC11049900; doi:10.3390/insects15040288)
Supplement: Supplementary file 1 [file insects-15-00288-s001.zip › Supplementary Files-proofreading/Table S2 Table of DEGs.xlsx]

## Sheet: Sheet1
Gene_ID	Length	Trans_ID	Annotation	Name	swissprot_description	GO_Term	NOG	KOEntry	KODescription	EC	KEGG_Pathway	Pfam_description	Family	WI_1_count	WI_2_count	WI_3_count	control1_count	control2_count	control3_count	WI_1_TPM	WI_2_TPM	WI_3_TPM	control1_TPM	control2_TPM	control3_TPM	WI_treatment_mean_TPM	control_mean_TPM	log2FC	regulation	pvalue	FDR	significant
TRINITY_DN12543_c0_g2	5986	TRINITY_DN12543_c0_g2_i1	mCG133649, isoform CRA_b, partial [Mus musculus]	Myh6	Myosin-6 OS=Mus musculus GN=Myh6 PE=1 SV=2	GO:0000146(microfilament motor activity);GO:0000166(nucleotide binding);GO:0001701(in utero embryonic development);GO:0001725(stress fiber);GO:0002026(regulation of the force of heart contraction);GO:0002027(regulation of heart rate);GO:0003774(motor activity);GO:0003779(actin binding);GO:0005515(protein binding);GO:0005516(calmodulin binding);GO:0005524(ATP binding);GO:0005737(cytoplasm);GO:0005…	COG5022(myosin heavy chain)	K17751	myosin heavy chain 6/7	-	mmu04919(Thyroid hormone signaling pathway);mmu04260(Cardiac muscle contraction);mmu04261(Adrenergic signaling in cardiomyocytes);mmu05410(Hypertrophic cardiomyopathy (HCM));mmu05414(Dilated cardiomyopathy (DCM));mmu05416(Viral myocarditis)	A0A093DIW8.1 PF00063.19;Myosin_head;	-	1628.49	656.52	589.02	1	0	0	18.29	6.84	6.82	0.01	0	0	10.65	0	10.772	up	8.85314e-29	1.44527e-24	yes
TRINITY_DN3858_c0_g1	1183	TRINITY_DN3858_c0_g1_i1;TRINITY_DN3858_c0_g1_i2;TRINITY_DN3858_c0_g1_i3;TRINITY_DN3858_c0_g1_i4	hypothetical protein EGK_05259 [Macaca mulatta]	TNNT2	Troponin T, cardiac muscle OS=Ovis aries GN=TNNT2 PE=2 SV=2	GO:0005861(troponin complex);GO:0006937(regulation of muscle contraction)	ENOG410XS6A(Troponin T type)	K12045	troponin T, cardiac muscle	-	cge04260(Cardiac muscle contraction);cge04261(Adrenergic signaling in cardiomyocytes);cge05410(Hypertrophic cardiomyopathy (HCM));cge05414(Dilated cardiomyopathy (DCM))	P09741.3 PF00992.18;Troponin;	-	783.59	332	301.38	3	0	0	71.08	27.09	27.44	0.32	0	0	41.87	0.11	8.43528	up	5.01097e-12	4.0902e-08	yes
TRINITY_DN4160_c0_g2	11407	TRINITY_DN4160_c0_g2_i1	PREDICTED: cubilin-like isoform X1 [Megachile rotundata]	CUBN	Cubilin OS=Canis lupus familiaris GN=CUBN PE=1 SV=1	GO:0005509(calcium ion binding);GO:0005768(endosome);GO:0005783(endoplasmic reticulum);GO:0005794(Golgi apparatus);GO:0005903(brush border);GO:0005905(clathrin-coated pit);GO:0006898(receptor-mediated endocytosis);GO:0016324(apical plasma membrane);GO:0030139(endocytic vesicle);GO:0042803(protein homodimerization activity);GO:0042953(lipoprotein transport);GO:0070062(extracellular exosome)	ENOG410ZPX7(Meprin A)	NA	NA	NA	-	A0A088ANB9.1 PF00431.18;CUB;	-	356.45	474.54	536.09	1636.61	3259.52	1324.53	2.02	2.5	3.14	10.78	23.77	10.59	2.55	15.05	-2.45713	down	4.72954e-11	2.57366e-07	yes
TRINITY_DN27042_c0_g1	871	TRINITY_DN27042_c0_g1_i1	myoglobin [Mus musculus]	Mb	Myoglobin OS=Mus musculus GN=Mb PE=1 SV=3	GO:0001666(response to hypoxia);GO:0005344(oxygen carrier activity);GO:0007507(heart development);GO:0009725(response to hormone);GO:0015671(oxygen transport);GO:0019825(oxygen binding);GO:0020037(heme binding);GO:0042542(response to hydrogen peroxide);GO:0043353(enucleate erythrocyte differentiation);GO:0046872(metal ion binding);GO:0050873(brown fat cell differentiation)	COG1018(Is involved in NO detoxification in an aerobic process, termed nitric oxide dioxygenase (NOD) reaction that utilizes O(2) and NAD(P)H to convert NO to nitrate, which protects the bacterium from various noxious nitrogen compounds. Therefore, plays a central role in the inducible response to nitrosative stress (By similarity))	NA	NA	NA	-	Q9QZ76.3 PF00042.20;Globin;	-	643.4	282	262	3	0	0	94.14	36.52	37.72	0.51	0	0	56.13	0.17	8.18057	up	1.65386e-10	6.74983e-07	yes
TRINITY_DN628_c0_g5	2440	TRINITY_DN628_c0_g5_i1;TRINITY_DN628_c0_g5_i2;TRINITY_DN628_c0_g5_i3;TRINITY_DN628_c0_g5_i4;TRINITY_DN628_c0_g5_i5	sodium/potassium/calcium exchanger Nckx30C isoform X2 [Bombus terrestris]	Nckx30C	Sodium/potassium/calcium exchanger Nckx30C OS=Drosophila melanogaster GN=Nckx30C PE=2 SV=4	GO:0005262(calcium channel activity);GO:0005509(calcium ion binding);GO:0005887(integral component of plasma membrane);GO:0006814(sodium ion transport);GO:0006816(calcium ion transport);GO:0006874(cellular calcium ion homeostasis);GO:0008273(calcium, potassium:sodium antiporter activity);GO:0016021(integral component of membrane);GO:0030955(potassium ion binding);GO:0031402(sodium ion binding);GO…	ENOG410Y9YY(Solute carrier family 24 (Sodium potassium calcium exchanger), member)	NA	NA	NA	-	E9IU75.1 PF01699.22;Na_Ca_ex;	-	425.59	394.48	331.9	905.58	1568.23	1729.22	26.03	22.21	16.14	62.52	96.65	132.48	21.46	97.22	-2.17023	down	1.45481e-09	4.74995e-06	yes
TRINITY_DN27244_c0_g1	608	TRINITY_DN27244_c0_g1_i1	PREDICTED: myosin regulatory light chain 2, ventricular/cardiac muscle isoform isoform X1 [Mus musculus]	Myl2	Myosin regulatory light chain 2, ventricular/cardiac muscle isoform OS=Mus musculus GN=Myl2 PE=1 SV=3	GO:0002026(regulation of the force of heart contraction);GO:0003007(heart morphogenesis);GO:0003785(actin monomer binding);GO:0005509(calcium ion binding);GO:0005737(cytoplasm);GO:0005856(cytoskeleton);GO:0007507(heart development);GO:0009791(post-embryonic development);GO:0015629(actin cytoskeleton);GO:0016459(myosin complex);GO:0030016(myofibril);GO:0030308(negative regulation of cell growth);G…	COG5126(Calcium-binding protein)	K10351	myosin regulatory light chain 2	-	mmu04371(Apelin signaling pathway);mmu04510(Focal adhesion);mmu04530(Tight junction);mmu04810(Regulation of actin cytoskeleton);mmu04670(Leukocyte transendothelial migration);mmu04260(Cardiac muscle contraction);mmu04261(Adrenergic signaling in cardiomyocytes);mmu05410(Hypertrophic cardiomyopathy (HCM));mmu05414(Dilated cardiomyopathy (DCM))	I3NEG2.1 PF13499.4;EF-hand_7;	-	365.12	175	165.95	0	0	0	119.68	50.76	52.33	0	0	0	74.26	0	10.7365	up	1.80318e-09	4.90614e-06	yes
TRINITY_DN3053_c0_g1	2136	TRINITY_DN3053_c0_g1_i1	Cardiac phospholamban [Heterocephalus glaber]	Pln	Cardiac phospholamban OS=Mus musculus GN=Pln PE=1 SV=1	GO:0004857(enzyme inhibitor activity);GO:0005515(protein binding);GO:0005783(endoplasmic reticulum);GO:0033017(sarcoplasmic reticulum membrane);GO:0042030(ATPase inhibitor activity);GO:0043086(negative regulation of catalytic activity);GO:0048471(perinuclear region of cytoplasm);GO:0051117(ATPase binding);GO:0051924(regulation of calcium ion transport);GO:0090281(negative regulation of calcium io…	ENOG4111BFT(Phospholamban)	K05852	phospholamban	-	mcc04020(Calcium signaling pathway);mcc04024(cAMP signaling pathway);mcc04022(cGMP - PKG signaling pathway);mcc04919(Thyroid hormone signaling pathway);mcc04261(Adrenergic signaling in cardiomyocytes);mcc05414(Dilated cardiomyopathy (DCM))	H2PQL6.1 PF04272.12;Phospholamban;	-	379	181.82	145.54	0	0	0	13.96	6.16	5.47	0	0	0	8.53	0	10.7366	up	2.25274e-09	5.25372e-06	yes
TRINITY_DN2963_c0_g1	9544	TRINITY_DN2963_c0_g1_i1;TRINITY_DN2963_c0_g1_i2;TRINITY_DN2963_c0_g1_i3;TRINITY_DN2963_c0_g1_i4;TRINITY_DN2963_c0_g1_i5;TRINITY_DN2963_c0_g1_i6;TRINITY_DN2963_c0_g1_i7;TRINITY_DN2963_c0_g1_i8	PREDICTED: glycogen-binding subunit 76A isoform X1 [Megachile rotundata]	Gbs-76A	Glycogen-binding subunit 76A OS=Drosophila melanogaster GN=Gbs-76A PE=1 SV=1	GO:0008157(protein phosphatase 1 binding)	ENOG4111FT1(protein phosphatase 1, regulatory subunit)	NA	NA	NA	-	A0A088A8P4.1 PF03370.11;CBM_21;	-	742	583.74	759.75	1512.39	2485	2087.48	8	6.21	6.81	16.66	26.93	23.53	7.01	22.37	-1.83352	down	5.42519e-09	1.00364e-05	yes
TRINITY_DN208_c0_g2	6654	TRINITY_DN208_c0_g2_i1;TRINITY_DN208_c0_g2_i2;TRINITY_DN208_c0_g2_i3;TRINITY_DN208_c0_g2_i4	PREDICTED: protein Tob1-like [Megachile rotundata]	Tob1	Protein Tob1 OS=Mus musculus GN=Tob1 PE=1 SV=2	GO:0003714(transcription corepressor activity);GO:0005515(protein binding);GO:0005634(nucleus);GO:0005737(cytoplasm);GO:0007616(long-term memory);GO:0010468(regulation of gene expression);GO:0023052(signaling);GO:0044297(cell body);GO:0051259(protein complex oligomerization);GO:0097060(synaptic membrane)	ENOG410ZZC0(negative regulation of nuclear-transcribed mRNA poly(A) tail shortening)	K14443	protein Tob/BTG	-	ame03018(RNA degradation)	F4X3M3.1 PF07742.10;BTG;	-	2180.22	1589.9	2272.43	4112.79	7226.9	7129.14	21.96	14.86	23.56	47.99	92.78	100.3	20.13	80.36	-1.90511	down	5.53308e-09	1.00364e-05	yes
TRINITY_DN25205_c0_g1	855	TRINITY_DN25205_c0_g1_i1	myosin, light polypeptide 3, isoform CRA_a, partial [Mus musculus]	Myl3	Myosin light chain 3 OS=Mus musculus GN=Myl3 PE=1 SV=4	GO:0002026(regulation of the force of heart contraction);GO:0003774(motor activity);GO:0003785(actin monomer binding);GO:0005509(calcium ion binding);GO:0006942(regulation of striated muscle contraction);GO:0016459(myosin complex);GO:0031672(A band);GO:0031674(I band);GO:0055010(ventricular cardiac muscle tissue morphogenesis);GO:0060048(cardiac muscle contraction)	COG5126(Calcium-binding protein)	K12749	myosin light chain 3	-	mmu04371(Apelin signaling pathway);mmu04260(Cardiac muscle contraction);mmu04261(Adrenergic signaling in cardiomyocytes);mmu05410(Hypertrophic cardiomyopathy (HCM));mmu05414(Dilated cardiomyopathy (DCM))	B3S9B3.1 PF13499.4;EF-hand_7;	-	351.07	153.55	120	0	0	0	53.35	20.62	17.91	0	0	0	30.63	0	10.5581	up	1.35463e-08	2.21144e-05	yes
TRINITY_DN219_c0_g2	7286	TRINITY_DN219_c0_g2_i1;TRINITY_DN219_c0_g2_i2;TRINITY_DN219_c0_g2_i3;TRINITY_DN219_c0_g2_i4;TRINITY_DN219_c0_g2_i5;TRINITY_DN219_c0_g2_i6;TRINITY_DN219_c0_g2_i7;TRINITY_DN219_c0_g2_i8	PREDICTED: uncharacterized protein LOC100874702 isoform X1 [Megachile rotundata]	cas	Transcription factor castor OS=Drosophila melanogaster GN=cas PE=1 SV=2	GO:0003677(DNA binding);GO:0003700(DNA binding transcription factor activity);GO:0005634(nucleus);GO:0006355(regulation of transcription, DNA-templated);GO:0007402(ganglion mother cell fate determination);GO:0007417(central nervous system development);GO:0007419(ventral cord development);GO:0009791(post-embryonic development);GO:0010906(regulation of glucose metabolic process);GO:0014019(neurobla…	ENOG410XRBA(Castor zinc finger 1)	-	-	-	-	-	Others	261.98	233.65	220.71	560.54	1026.94	1347.42	3.72	2.82	2.69	7.85	16.5	24.07	3.08	16.14	-2.33998	down	2.74154e-08	4.0687e-05	yes
TRINITY_DN3440_c0_g2	2344	TRINITY_DN3440_c0_g2_i1	-	-	-	-	-	-	-	-	-	-	-	123.7	426.43	92.74	0	0	0	4.06	12.87	3.11	0	0	0	6.68	0	10.5877	up	3.34161e-08	4.54598e-05	yes
TRINITY_DN551_c0_g1	9179	TRINITY_DN551_c0_g1_i1;TRINITY_DN551_c0_g1_i2;TRINITY_DN551_c0_g1_i3	PREDICTED: sestrin-1 [Apis cerana]	sesn1	Sestrin-1 OS=Xenopus laevis GN=sesn1 PE=2 SV=1	GO:0003674(molecular_function);GO:0005634(nucleus);GO:0007368(determination of left/right symmetry);GO:1901031(regulation of response to reactive oxygen species)	ENOG410XP7Z(Sestrin 1)	K10141	sestrin 1/3	-	lcf04115(p53 signaling pathway)	E9J4T8.1 PF04636.11;PA26;	-	5555.4	4886.26	5420.83	8892.12	16124.7	16084.5	50.34	41.37	50.55	91.93	184.3	201.63	47.42	159.29	-1.67024	down	1.42327e-07	0.00017873	yes
TRINITY_DN1019_c0_g2	6316	TRINITY_DN1019_c0_g2_i1;TRINITY_DN1019_c0_g2_i2;TRINITY_DN1019_c0_g2_i3;TRINITY_DN1019_c0_g2_i4	PREDICTED: uncharacterized protein LOC100876256 isoform X2 [Megachile rotundata]	PPP2R3A	Serine/threonine-protein phosphatase 2A regulatory subunit B'' subunit alpha OS=Homo sapiens GN=PPP2R3A PE=1 SV=1	GO:0005509(calcium ion binding);GO:0046331(lateral inhibition)	ENOG410XRBK(Protein phosphatase 2, regulatory subunit B)	K11583	serine/threonine-protein phosphatase 2A regulatory subunit B''	-	bter03015(mRNA surveillance pathway)	A0A088AM04.1 PF13499.4;EF-hand_7;	-	800.09	657.86	721.97	1289.35	2131	2120.17	8.55	6.52	7.95	15.98	29.02	31.63	7.67	25.54	-1.64211	down	2.1892e-07	0.000255277	yes
TRINITY_DN1392_c1_g1	1614	TRINITY_DN1392_c1_g1_i1;TRINITY_DN1392_c1_g1_i2;TRINITY_DN1392_c1_g1_i3	-	-	-	-	-	-	-	-	-	-	-	788.16	639.71	669.32	1196.28	2142.59	2194.81	42.33	31.51	36.43	74.28	138.26	152.83	36.76	121.79	-1.6985	down	2.49357e-07	0.000271383	yes
TRINITY_DN18844_c0_g1	3889	TRINITY_DN18844_c0_g1_i1;TRINITY_DN18844_c0_g1_i2;TRINITY_DN18844_c0_g1_i3;TRINITY_DN18844_c0_g1_i4;TRINITY_DN18844_c0_g1_i5;TRINITY_DN18844_c0_g1_i6;TRINITY_DN18844_c0_g1_i7;TRINITY_DN18844_c0_g1_i8;TRINITY_DN18844_c0_g1_i9	PREDICTED: uncharacterized protein LOC108556083 isoform X1 [Eufriesea mexicana]	-	-	GO:0030239(myofibril assembly)	ENOG4112DFE(PDZ domain (Also known as DHR or GLGF))	NA	NA	NA	-	A0A088AHJ3.1 PF00595.22;PDZ;	-	5102.03	4200.1	4638.05	9189.74	10344	10818.1	133.86	104.54	120.27	276.14	336.89	390.31	119.56	334.45	-1.41897	down	2.77128e-07	0.000282757	yes
TRINITY_DN10799_c0_g1	1963	TRINITY_DN10799_c0_g1_i1;TRINITY_DN10799_c0_g1_i2	PREDICTED: beta-1,3-glucan-binding protein-like [Megachile rotundata]	GRP	Beta-1,3-glucan-binding protein OS=Tenebrio molitor GN=GRP PE=1 SV=1	GO:0005576(extracellular region);GO:0042742(defense response to bacterium);GO:0045088(regulation of innate immune response)	ENOG410Z83Q(regulation of innate immune response)	K20697	gram-negative bacteria-binding protein 1	-	bter04624(Toll and Imd signaling pathway)	E2AVH4.1 PF00722.19;Glyco_hydro_16;	-	1479.7	1449.28	1209.98	2118.95	4658.54	7061.96	61.14	54.64	50.77	101.05	235.13	387.16	55.52	241.11	-2.05566	down	3.02475e-07	0.000290465	yes
TRINITY_DN3631_c0_g1	3881	TRINITY_DN3631_c0_g1_i1;TRINITY_DN3631_c0_g1_i2;TRINITY_DN3631_c0_g1_i3;TRINITY_DN3631_c0_g1_i4;TRINITY_DN3631_c0_g1_i5;TRINITY_DN3631_c0_g1_i6;TRINITY_DN3631_c0_g1_i7	PREDICTED: aconitate hydratase, mitochondrial-like [Megachile rotundata]	Aco2	Aconitate hydratase, mitochondrial OS=Mus musculus GN=Aco2 PE=1 SV=1	GO:0003994(aconitate hydratase activity);GO:0005739(mitochondrion);GO:0006099(tricarboxylic acid cycle);GO:0051539(4 iron, 4 sulfur cluster binding)	COG1048(aconitate hydratase)	K01681	aconitate hydratase	EC:4.2.1.3	bter00020(Citrate cycle (TCA cycle));bter00630(Glyoxylate and dicarboxylate metabolism)	F4X2U7.1 PF00330.18;Aconitase;	-	71126.2	62488.8	55370.8	115313	150420	176329	1537.09	1250.32	1227.84	2886.84	4069.08	5206.2	1338.42	4054.04	-1.52943	down	3.57236e-07	0.000323993	yes
TRINITY_DN1218_c0_g1	6339	TRINITY_DN1218_c0_g1_i1;TRINITY_DN1218_c0_g1_i2;TRINITY_DN1218_c0_g1_i3;TRINITY_DN1218_c0_g1_i4;TRINITY_DN1218_c0_g1_i5	PREDICTED: leucine-rich repeats and immunoglobulin-like domains protein 1 isoform X1 [Habropoda laboriosa]	-	-	GO:0005615(extracellular space);GO:0007409(axonogenesis)	COG4886(leucine Rich Repeat)	-	-	-	-	E2ANM6.1 PF13855.4;LRR_8;	-	1496.15	1209.82	1354.53	2630.74	3071.83	3338.87	17.23	13.06	16.22	35.24	44.84	53.69	15.5	44.59	-1.45226	down	4.33134e-07	0.000372153	yes
TRINITY_DN9301_c0_g1	2679	TRINITY_DN9301_c0_g1_i1	transforming growth factor-beta-induced protein ig-h3 precursor [Homo sapiens]	TGFBI	Transforming growth factor-beta-induced protein ig-h3 OS=Homo sapiens GN=TGFBI PE=1 SV=1	GO:0001525(angiogenesis);GO:0002062(chondrocyte differentiation);GO:0005178(integrin binding);GO:0005515(protein binding);GO:0005518(collagen binding);GO:0005576(extracellular region);GO:0005604(basement membrane);GO:0005615(extracellular space);GO:0005802(trans-Golgi network);GO:0005886(plasma membrane);GO:0007155(cell adhesion);GO:0007162(negative regulation of cell adhesion);GO:0007601(visual …	COG2335(Beta-Ig-H3 fasciclin)	NA	NA	NA	-	F1PW10.2 PF02469.20;Fasciclin;	-	1065.05	663.95	6	3	0	0	29.69	17.07	0.17	0.1	0	0	15.64	0.03	8.71292	up	4.74947e-07	0.000387675	yes
TRINITY_DN1517_c0_g1	7009	TRINITY_DN1517_c0_g1_i1;TRINITY_DN1517_c0_g1_i2;TRINITY_DN1517_c0_g1_i3	PREDICTED: cytoplasmic polyadenylation element-binding protein 2-like isoform X2 [Apis dorsata]	orb2	Translational regulator orb2 OS=Drosophila melanogaster GN=orb2 PE=1 SV=1	GO:0000900(translation repressor activity, mRNA regulatory element binding);GO:0003730(mRNA 3'-UTR binding);GO:0005634(nucleus);GO:0005737(cytoplasm);GO:0008135(translation factor activity, RNA binding);GO:0043005(neuron projection);GO:0043022(ribosome binding);GO:0045202(synapse);GO:1990124(messenger ribonucleoprotein complex);GO:2000766(negative regulation of cytoplasmic translation)	ENOG410Y1XZ(Cytoplasmic polyadenylation element binding protein)	K02602	cytoplasmic polyadenylation element-binding protein	-	ame04320(Dorso-ventral axis formation)	A0A088ACR5.1 PF16367.3;RRM_7;	Others	1206.54	884.47	1339.54	1879.1	3793.99	3639.82	11.53	7.84	13.2	20.83	46.32	48.67	10.86	38.61	-1.73232	down	6.90257e-07	0.000536592	yes
TRINITY_DN15559_c0_g2	6321	TRINITY_DN15559_c0_g2_i1;TRINITY_DN15559_c0_g2_i2;TRINITY_DN15559_c0_g2_i3	PREDICTED: murinoglobulin-1-like [Megachile rotundata]	Mug1	Murinoglobulin-1 OS=Mus musculus GN=Mug1 PE=1 SV=3	GO:0004866(endopeptidase inhibitor activity);GO:0005615(extracellular space);GO:0010951(negative regulation of endopeptidase activity)	ENOG410XRED(Complement component)	NA	NA	NA	-	E2BXH3.1 PF07678.12;A2M_comp;	-	2618.55	2726.42	2680.85	4499.35	6264.09	7989.9	30.41	29.68	32.24	57.45	85.83	126.28	30.78	89.85	-1.52821	down	7.62092e-07	0.000552525	yes
TRINITY_DN3299_c0_g1	11502	TRINITY_DN3299_c0_g1_i1;TRINITY_DN3299_c0_g1_i10;TRINITY_DN3299_c0_g1_i11;TRINITY_DN3299_c0_g1_i12;TRINITY_DN3299_c0_g1_i13;TRINITY_DN3299_c0_g1_i14;TRINITY_DN3299_c0_g1_i16;TRINITY_DN3299_c0_g1_i17;TRINITY_DN3299_c0_g1_i18;TRINITY_DN3299_c0_g1_i19;TRINITY_DN3299_c0_g1_i2;TRINITY_DN3299_c0_g1_i20;TRINITY_DN3299_c0_g1_i21;TRINITY_DN3299_c0_g1_i22;TRINITY_DN3299_c0_g1_i23;TRINITY_DN3299_c0_g1_i24;T…	PREDICTED: titin isoform X6 [Megachile rotundata]	Zasp52	PDZ and LIM domain protein Zasp OS=Drosophila melanogaster GN=Zasp52 PE=1 SV=2	GO:0001952(regulation of cell-matrix adhesion);GO:0015629(actin cytoskeleton);GO:0051371(muscle alpha-actinin binding)	ENOG410XRD4(PDZ and LIM domain)	NA	NA	NA	-	A0A088AHJ4.1 PF00595.22;PDZ;	-	19313.7	13812.1	18547.7	31874.2	41403.4	48782.5	309.55	203.41	316.98	487.28	702.34	880.92	276.65	690.18	-1.53827	down	7.78442e-07	0.000552525	yes
TRINITY_DN751_c0_g5	8722	TRINITY_DN751_c0_g5_i1	Aminomethyltransferase, mitochondrial [Atta colombica]	-	-	-	-	-	-	-	-	-	-	845.62	683.29	880.28	1391.2	2154.34	2166.28	6.36	4.77	6.83	12.13	20.75	22.87	5.99	18.58	-1.53951	down	9.18044e-07	0.000618513	yes
TRINITY_DN5226_c0_g2	6306	TRINITY_DN5226_c0_g2_i1	PREDICTED: transcription factor Ken 2 isoform X1 [Megachile rotundata]	ken	Transcription factor Ken OS=Drosophila pseudoobscura pseudoobscura GN=ken PE=3 SV=2	GO:0003677(DNA binding);GO:0003700(DNA binding transcription factor activity);GO:0005634(nucleus);GO:0006355(regulation of transcription, DNA-templated);GO:0030539(male genitalia development);GO:0030540(female genitalia development);GO:0045496(male analia development);GO:0045497(female analia development);GO:0046426(negative regulation of JAK-STAT cascade)	COG5048(Zinc finger protein)	NA	NA	NA	-	E9INZ7.1 PF00651.29;BTB;	zf-C2H2	877.07	772.78	971.52	1535.58	2187.02	2608.75	9.31	7.62	10.63	18.91	29.61	38.69	9.19	29.07	-1.5707	down	9.60922e-07	0.000618513	yes
TRINITY_DN160_c0_g1	3110	TRINITY_DN160_c0_g1_i1	PREDICTED: uncharacterized protein LOC100878678 [Megachile rotundata]	-	-	-	ENOG410YGM5(NA)	-	-	-	-	-	-	2016.67	1750	2158.7	3623.22	4372.55	8062.44	47.11	37.77	51.73	98.16	127.77	257.4	45.54	161.11	-1.74929	down	9.85075e-07	0.000618513	yes
TRINITY_DN3954_c0_g2	7488	TRINITY_DN3954_c0_g2_i1;TRINITY_DN3954_c0_g2_i2;TRINITY_DN3954_c0_g2_i3;TRINITY_DN3954_c0_g2_i4	PREDICTED: calmodulin-lysine N-methyltransferase isoform X2 [Megachile rotundata]	Camkmt	Calmodulin-lysine N-methyltransferase OS=Rattus norvegicus GN=Camkmt PE=1 SV=1	GO:0005634(nucleus);GO:0005737(cytoplasm);GO:0006417(regulation of translation);GO:0008757(S-adenosylmethionine-dependent methyltransferase activity)	ENOG4110DEX(Calmodulin-lysine N-methyltransferase)	K18826	calmodulin-lysine N-methyltransferase	EC:2.1.1.60	bter00310(Lysine degradation)	E2BT96.1 PF10294.7;Methyltransf_16;	-	4764.79	3898.65	3943.51	7761.94	9125.19	9053.05	103.71	73.38	87.59	205.64	248.15	287.33	88.23	247.04	-1.3374	down	1.04492e-06	0.00063179	yes
TRINITY_DN9909_c0_g1	5231	TRINITY_DN9909_c0_g1_i1;TRINITY_DN9909_c0_g1_i2;TRINITY_DN9909_c0_g1_i3;TRINITY_DN9909_c0_g1_i4;TRINITY_DN9909_c0_g1_i5;TRINITY_DN9909_c0_g1_i6	PREDICTED: 5'-nucleotidase domain-containing protein 3 isoform X1 [Megachile rotundata]	nt5dc3	5'-nucleotidase domain-containing protein 3 OS=Xenopus laevis GN=nt5dc3 PE=2 SV=1	GO:0003697(single-stranded DNA binding);GO:0005634(nucleus);GO:0006974(cellular response to DNA damage stimulus);GO:0008253(5'-nucleotidase activity)	ENOG410XT8W(5-nucleotidase domain containing)	K01081	5'-nucleotidase	EC:3.1.3.5	cel00230(Purine metabolism);cel00240(Pyrimidine metabolism);cel00760(Nicotinate and nicotinamide metabolism)	A0A088ABF5.1 PF05761.12;5_nucleotid;	-	2186.54	1863.41	1716.78	3756.7	4355.9	3624.61	54.71	43.66	43.95	111.73	137.41	124.51	47.44	124.55	-1.31833	down	1.40347e-06	0.000818275	yes
TRINITY_DN842_c0_g1	3813	TRINITY_DN842_c0_g1_i1	CCAAT/enhancer-binding protein [Bombus terrestris]	-	-	-	ENOG4111S4B(sequence-specific DNA binding)	NA	NA	NA	-	-	TF_bZIP	1749.97	2010.2	2195.1	3841.22	3948.94	4701.03	32.35	34.38	41.69	82.34	91.96	119.73	36.14	98.01	-1.36668	down	1.643e-06	0.000924896	yes
TRINITY_DN1404_c1_g1	3667	TRINITY_DN1404_c1_g1_i1;TRINITY_DN1404_c1_g1_i10;TRINITY_DN1404_c1_g1_i11;TRINITY_DN1404_c1_g1_i2;TRINITY_DN1404_c1_g1_i3;TRINITY_DN1404_c1_g1_i4;TRINITY_DN1404_c1_g1_i5;TRINITY_DN1404_c1_g1_i6;TRINITY_DN1404_c1_g1_i7;TRINITY_DN1404_c1_g1_i8;TRINITY_DN1404_c1_g1_i9	glycogen synthase kinase-3 beta isoform X5 [Bombus terrestris]	sgg	Protein kinase shaggy OS=Drosophila melanogaster GN=sgg PE=1 SV=3	GO:0003382(epithelial cell morphogenesis);GO:0004672(protein kinase activity);GO:0004674(protein serine/threonine kinase activity);GO:0005515(protein binding);GO:0005524(ATP binding);GO:0005634(nucleus);GO:0005654(nucleoplasm);GO:0005737(cytoplasm);GO:0005813(centrosome);GO:0005829(cytosol);GO:0006468(protein phosphorylation);GO:0007051(spindle organization);GO:0007143(female meiotic nuclear divi…	COG0515(Serine Threonine protein kinase)	K03083	glycogen synthase kinase 3 beta	EC:2.7.11.26	bim04310(Wnt signaling pathway);bim04341(Hedgehog signaling pathway - fly);bim04150(mTOR signaling pathway);bim04711(Circadian rhythm - fly)	W4X7B9.1 PF00069.23;Pkinase;	-	2399.55	2017.35	2202.94	3399.84	5468.51	6536.27	55.74	42.44	49.49	98.54	161.7	204.06	49.22	154.77	-1.52048	down	2.20479e-06	0.0011909	yes
TRINITY_DN441_c0_g1	1235	TRINITY_DN441_c0_g1_i1;TRINITY_DN441_c0_g1_i2;TRINITY_DN441_c0_g1_i3;TRINITY_DN441_c0_g1_i4	PREDICTED: uncharacterized protein LOC108546740 [Eufriesea mexicana]	-	-	-	-	-	-	-	-	-	-	495.98	19033.5	80.06	16	53	80	83.17	2759.23	12.55	4.12	9.39	14.4	951.65	9.3	6.69068	up	2.38809e-06	0.0011909	yes
TRINITY_DN8962_c0_g1	6216	TRINITY_DN8962_c0_g1_i1	laminin subunit beta-1 [Ceratina calcarata]	LanB1	Laminin subunit beta-1 OS=Drosophila melanogaster GN=LanB1 PE=1 SV=4	GO:0003143(embryonic heart tube morphogenesis);GO:0005604(basement membrane);GO:0008406(gonad development);GO:0012505(endomembrane system);GO:0016477(cell migration);GO:0030198(extracellular matrix organization);GO:0031012(extracellular matrix);GO:0033627(cell adhesion mediated by integrin);GO:0034446(substrate adhesion-dependent cell spreading);GO:0045089(positive regulation of innate immune res…	ENOG410XPEG(laminin beta)	K05636	laminin, beta 1	-	bter04512(ECM-receptor interaction)	A0A088A9Y9.1 PF00055.15;Laminin_N;	-	982.34	1073.17	890.22	1437.79	2637	3628.29	10.59	10.74	9.89	17.99	36.25	54.63	10.41	36.29	-1.69704	down	2.39107e-06	0.0011909	yes
TRINITY_DN13902_c0_g1	6332	TRINITY_DN13902_c0_g1_i1;TRINITY_DN13902_c0_g1_i2;TRINITY_DN13902_c0_g1_i3	PREDICTED: trichohyalin-like [Eufriesea mexicana]	-	-	-	ENOG410XWH3(NA)	NA	NA	NA	-	-	-	7425.92	6354.57	5889.72	9318.91	18260.7	25518.2	78.63	62.44	64.26	114.38	246.42	377.43	68.44	246.08	-1.74281	down	2.48689e-06	0.0011909	yes
TRINITY_DN16281_c0_g1	1190	TRINITY_DN16281_c0_g1_i1;TRINITY_DN16281_c0_g1_i2;TRINITY_DN16281_c0_g1_i3;TRINITY_DN16281_c0_g1_i5;TRINITY_DN16281_c0_g1_i6;TRINITY_DN16281_c0_g1_i7	PREDICTED: trehalase isoform X1 [Megachile rotundata]	-	-	-	-	K01194	alpha,alpha-trehalase	EC:3.2.1.28	bim00500(Starch and sucrose metabolism)	-	-	863.95	761.23	687.82	1277.16	1878.3	1978.29	95.49	76.51	74.94	165.51	229.79	265.83	82.31	220.38	-1.4504	down	2.51038e-06	0.0011909	yes
TRINITY_DN40_c1_g1	3638	TRINITY_DN40_c1_g1_i1	PREDICTED: calsyntenin-1 isoform X1 [Megachile rotundata]	Cals	Calsyntenin-1 OS=Drosophila melanogaster GN=Cals PE=1 SV=2	GO:0005509(calcium ion binding);GO:0005576(extracellular region);GO:0005887(integral component of plasma membrane);GO:0007156(homophilic cell adhesion via plasma membrane adhesion molecules);GO:0009986(cell surface);GO:0016339(calcium-dependent cell-cell adhesion via plasma membrane cell adhesion molecules);GO:0044331(cell-cell adhesion mediated by cadherin);GO:0045211(postsynaptic membrane);GO:0…	ENOG410XT2J(CAlSYntenin)	NA	NA	NA	-	E9I831.1 PF13385.4;Laminin_G_3;	-	1738.27	1347.47	1545.41	2328.15	3880.8	5722.65	33.89	24.3	30.95	52.64	95.19	153.47	29.71	100.43	-1.67395	down	2.55324e-06	0.0011909	yes
TRINITY_DN11032_c0_g1	5272	TRINITY_DN11032_c0_g1_i1	PREDICTED: LOW QUALITY PROTEIN: uncharacterized protein LOC100875636 [Megachile rotundata]	-	-	-	ENOG4111T2D(Lipoprotein amino terminal region)	NA	NA	NA	-	A0A088AGQ0.1 PF01347.20;Vitellogenin_N;	-	528.81	544	755.79	1263	1296	2304.46	6.82	6.5	10.03	18.89	21.23	41.34	7.78	27.15	-1.71648	down	2.65011e-06	0.00120175	yes
TRINITY_DN1916_c0_g1	5793	TRINITY_DN1916_c0_g1_i1;TRINITY_DN1916_c0_g1_i10;TRINITY_DN1916_c0_g1_i11;TRINITY_DN1916_c0_g1_i12;TRINITY_DN1916_c0_g1_i13;TRINITY_DN1916_c0_g1_i14;TRINITY_DN1916_c0_g1_i15;TRINITY_DN1916_c0_g1_i16;TRINITY_DN1916_c0_g1_i17;TRINITY_DN1916_c0_g1_i18;TRINITY_DN1916_c0_g1_i19;TRINITY_DN1916_c0_g1_i2;TRINITY_DN1916_c0_g1_i20;TRINITY_DN1916_c0_g1_i21;TRINITY_DN1916_c0_g1_i22;TRINITY_DN1916_c0_g1_i23;T…	disks large 1 tumor suppressor protein isoform X14 [Bombus impatiens]	dlg1	Disks large 1 tumor suppressor protein OS=Drosophila melanogaster GN=dlg1 PE=1 SV=2	GO:0000122(negative regulation of transcription by RNA polymerase II);GO:0000132(establishment of mitotic spindle orientation);GO:0001708(cell fate specification);GO:0001738(morphogenesis of a polarized epithelium);GO:0002009(morphogenesis of an epithelium);GO:0004385(guanylate kinase activity);GO:0005154(epidermal growth factor receptor binding);GO:0005198(structural molecule activity);GO:000551…	COG0194(Essential for recycling GMP and indirectly, cGMP (By similarity))	K12076	disks large protein 1	-	bim04391(Hippo signaling pathway -fly)	H9JLI1.1 PF00625.19;Guanylate_kin;	-	7200.46	5398.03	7404.17	11433	15981	15268.1	121.31	86.77	120.92	218.88	321.39	335.1	109.67	291.79	-1.38536	down	3.08704e-06	0.00136205	yes
TRINITY_DN1566_c2_g1	3049	TRINITY_DN1566_c2_g1_i1;TRINITY_DN1566_c2_g1_i10;TRINITY_DN1566_c2_g1_i12;TRINITY_DN1566_c2_g1_i13;TRINITY_DN1566_c2_g1_i14;TRINITY_DN1566_c2_g1_i16;TRINITY_DN1566_c2_g1_i17;TRINITY_DN1566_c2_g1_i18;TRINITY_DN1566_c2_g1_i19;TRINITY_DN1566_c2_g1_i2;TRINITY_DN1566_c2_g1_i20;TRINITY_DN1566_c2_g1_i21;TRINITY_DN1566_c2_g1_i22;TRINITY_DN1566_c2_g1_i23;TRINITY_DN1566_c2_g1_i3;TRINITY_DN1566_c2_g1_i4;TRI…	PREDICTED: nuclear factor 1 X-type-like isoform X17 [Megachile rotundata]	NFIA	Nuclear factor 1 A-type OS=Homo sapiens GN=NFIA PE=1 SV=2	GO:0000122(negative regulation of transcription by RNA polymerase II);GO:0000981(RNA polymerase II transcription factor activity, sequence-specific DNA binding);GO:0005634(nucleus);GO:0006260(DNA replication);GO:0045944(positive regulation of transcription by RNA polymerase II)	ENOG410Y16G(Recognizes and binds the palindromic sequence 5'- TTGGCNNNNNGCCAA-3' present in viral and cellular promoters and in the origin of replication of adenovirus type 2. These proteins are individually capable of activating transcription and replication (By similarity))	NA	NA	NA	-	A0A0Q9WKD8.1 PF03165.14;MH1;	CTF_NFI	473.08	283.47	469.31	783.05	1390.88	1166.78	11.9	6.66	12.05	22.85	43.55	40.68	10.2	35.69	-1.73472	down	3.556e-06	0.00152568	yes
TRINITY_DN3127_c0_g1	1014	TRINITY_DN3127_c0_g1_i1	-	-	-	-	-	-	-	-	-	-	-	449.54	409.09	422.98	700.17	1350.12	1292.31	49.3	40.18	46.18	88.88	164.25	169.11	45.22	140.75	-1.67854	down	3.64481e-06	0.00152568	yes
TRINITY_DN89_c1_g2	3520	TRINITY_DN89_c1_g2_i1;TRINITY_DN89_c1_g2_i2;TRINITY_DN89_c1_g2_i3;TRINITY_DN89_c1_g2_i4	PREDICTED: transcription activator MSS11-like isoform X2 [Apis florea]	-	-	-	-	-	-	-	-	-	-	908.43	612.19	846.35	1412.11	2048.24	1768.53	21.35	13.28	20.98	40.42	63.65	59.31	18.54	54.46	-1.43377	down	3.87379e-06	0.00158099	yes
TRINITY_DN6889_c0_g3	2687	TRINITY_DN6889_c0_g3_i1	PREDICTED: myosin-binding protein C, cardiac-type isoform X2 [Mus musculus]	Mybpc3	Myosin-binding protein C, cardiac-type OS=Mus musculus GN=Mybpc3 PE=1 SV=1	GO:0002027(regulation of heart rate);GO:0003007(heart morphogenesis);GO:0003779(actin binding);GO:0005200(structural constituent of cytoskeleton);GO:0005515(protein binding);GO:0005856(cytoskeleton);GO:0005859(muscle myosin complex);GO:0005863(striated muscle myosin thick filament);GO:0005865(striated muscle thin filament);GO:0006936(muscle contraction);GO:0006941(striated muscle contraction);GO:…	ENOG4110AYI(Myosin binding protein C)	K12568	myosin-binding protein C, cardiac-type	-	mmu05410(Hypertrophic cardiomyopathy (HCM));mmu05414(Dilated cardiomyopathy (DCM))	E9Q9T8.1 PF07679.14;I-set;	-	167.4	66.8	82.85	0	0	0	4.65	1.71	2.36	0	0	0	2.91	0	9.58473	up	4.20028e-06	0.00167243	yes
TRINITY_DN1491_c1_g4	3297	TRINITY_DN1491_c1_g4_i1;TRINITY_DN1491_c1_g4_i2;TRINITY_DN1491_c1_g4_i3;TRINITY_DN1491_c1_g4_i4;TRINITY_DN1491_c1_g4_i5	PREDICTED: putative inorganic phosphate cotransporter isoform X1 [Megachile rotundata]	Picot	Putative inorganic phosphate cotransporter OS=Drosophila melanogaster GN=Picot PE=2 SV=1	GO:0005886(plasma membrane);GO:0006820(anion transport);GO:0016021(integral component of membrane);GO:0022857(transmembrane transporter activity);GO:0055085(transmembrane transport)	ENOG410ZMWY(Major Facilitator Superfamily)	NA	NA	NA	-	A0A088AJE0.1 PF07690.14;MFS_1;	-	2198.31	1987.35	1694.82	2806.97	4920.06	6272.68	62.42	60.2	58.08	87.67	148.49	195	60.23	143.72	-1.5593	down	4.37353e-06	0.00168992	yes
TRINITY_DN1639_c0_g1	3285	TRINITY_DN1639_c0_g1_i1	PREDICTED: endothelin-converting enzyme 1-like [Megachile rotundata]	Mmel1	Membrane metallo-endopeptidase-like 1 OS=Mus musculus GN=Mmel1 PE=1 SV=1	GO:0004175(endopeptidase activity);GO:0004222(metalloendopeptidase activity);GO:0005615(extracellular space);GO:0006508(proteolysis);GO:0008237(metallopeptidase activity);GO:0016021(integral component of membrane);GO:0016529(sarcoplasmic reticulum)	COG3590(endothelin-converting enzyme)	NA	NA	NA	-	E2C9F3.1 PF01431.19;Peptidase_M13;	-	3213.18	4216.37	3557.03	9168.73	8542.74	5288	70.44	85.42	80.02	233.08	234.74	158.8	78.63	208.87	-1.35128	down	4.45123e-06	0.00168992	yes
TRINITY_DN24201_c0_g1	5805	TRINITY_DN24201_c0_g1_i1;TRINITY_DN24201_c0_g1_i10;TRINITY_DN24201_c0_g1_i11;TRINITY_DN24201_c0_g1_i12;TRINITY_DN24201_c0_g1_i13;TRINITY_DN24201_c0_g1_i14;TRINITY_DN24201_c0_g1_i2;TRINITY_DN24201_c0_g1_i3;TRINITY_DN24201_c0_g1_i4;TRINITY_DN24201_c0_g1_i5;TRINITY_DN24201_c0_g1_i6;TRINITY_DN24201_c0_g1_i7;TRINITY_DN24201_c0_g1_i8;TRINITY_DN24201_c0_g1_i9	PREDICTED: titin [Megachile rotundata]	-	-	-	ENOG410XS0C(NA)	-	-	-	-	A0A0J7KZY4.1 PF05217.10;STOP;	-	1425.83	1081.15	1865.87	2354.8	4088.84	4437.33	26.9	17.06	30.61	43.95	95.32	110.23	24.86	83.17	-1.60756	down	4.61434e-06	0.00171203	yes
TRINITY_DN7540_c0_g1	6068	TRINITY_DN7540_c0_g1_i1;TRINITY_DN7540_c0_g1_i2;TRINITY_DN7540_c0_g1_i3	vitellogenin [Osmia cornifrons]	Vg	Vitellogenin OS=Apis mellifera GN=Vg PE=1 SV=1	GO:0003674(molecular_function);GO:0005576(extracellular region);GO:0008150(biological_process)	ENOG4110M1Q(Vitellogenin)	-	-	-	-	A0A088ADL8.1 PF01347.20;Vitellogenin_N;	-	182678	190519	139701	244308	450773	928633	6321.29	7242.84	5481.61	4960.87	8953.53	26793.7	6348.58	13569.4	-1.98716	down	4.79643e-06	0.00174004	yes
TRINITY_DN428_c1_g4	2720	TRINITY_DN428_c1_g4_i1	PREDICTED: LOW QUALITY PROTEIN: 3-phosphoinositide-dependent protein kinase 1 [Megachile rotundata]	Pdk1	3-phosphoinositide-dependent protein kinase 1 OS=Drosophila melanogaster GN=Pdk1 PE=1 SV=4	GO:0004674(protein serine/threonine kinase activity);GO:0005622(intracellular);GO:0018105(peptidyl-serine phosphorylation);GO:0035556(intracellular signal transduction)	ENOG410XRT8(3phosphoinositidedependent protein kinase)	K06276	3-phosphoinositide dependent protein kinase-1	EC:2.7.11.1	ame04068(FoxO signaling pathway);ame04150(mTOR signaling pathway);ame04140(Autophagy - animal)	A0A087ZVX1.1 PF14593.4;PH_3;	-	1523.79	939.87	1245.79	2240.82	2650.75	3292.85	41.71	23.73	34.93	71.11	90.21	122.34	33.46	94.55	-1.44182	down	5.2807e-06	0.00185489	yes
TRINITY_DN147_c1_g1	6062	TRINITY_DN147_c1_g1_i1;TRINITY_DN147_c1_g1_i11;TRINITY_DN147_c1_g1_i12;TRINITY_DN147_c1_g1_i2;TRINITY_DN147_c1_g1_i3;TRINITY_DN147_c1_g1_i4;TRINITY_DN147_c1_g1_i6;TRINITY_DN147_c1_g1_i7;TRINITY_DN147_c1_g1_i8;TRINITY_DN147_c1_g1_i9	glutaminase liver isoform, mitochondrial isoform X3 [Bombus terrestris]	Gls	Glutaminase kidney isoform, mitochondrial OS=Rattus norvegicus GN=Gls PE=1 SV=2	GO:0004359(glutaminase activity);GO:0005739(mitochondrion);GO:0005759(mitochondrial matrix);GO:0006537(glutamate biosynthetic process);GO:0006541(glutamine metabolic process);GO:0006543(glutamine catabolic process)	COG2066(Glutaminase)	K01425	glutaminase	EC:3.5.1.2	ame00250(Alanine, aspartate and glutamate metabolism);ame00220(Arginine biosynthesis);ame00471(D-Glutamine and D-glutamate metabolism)	A0A0J7KXF6.1 PF04960.13;Glutaminase;	-	3376.24	3019.9	3017.81	5258.83	6569.2	6584.56	53.22	43.47	47.55	96.64	134.03	134.82	48.08	121.83	-1.26469	down	5.34026e-06	0.00185489	yes
TRINITY_DN1986_c0_g2	10819	TRINITY_DN1986_c0_g2_i1;TRINITY_DN1986_c0_g2_i2;TRINITY_DN1986_c0_g2_i3;TRINITY_DN1986_c0_g2_i4	PREDICTED: apolipophorins [Megachile rotundata]	-	Apolipophorins OS=Locusta migratoria PE=1 SV=2	GO:0005102(receptor binding);GO:0005319(lipid transporter activity);GO:0005504(fatty acid binding);GO:0005576(extracellular region);GO:0005615(extracellular space);GO:0006810(transport);GO:0006869(lipid transport);GO:0007224(smoothened signaling pathway);GO:0008017(microtubule binding);GO:0016055(Wnt signaling pathway);GO:0019841(retinol binding);GO:0020037(heme binding);GO:0030139(endocytic vesi…	ENOG410Z6MR(Domain of Unknown Function (DUF1081))	NA	NA	NA	-	A0A088AS56.1 PF01347.20;Vitellogenin_N;	-	48231	43827.5	44063.3	65415.3	110170	198923	291.05	246.53	274.65	455.37	848.57	1682.48	270.74	995.47	-1.77596	down	5.604e-06	0.00190595	yes
TRINITY_DN862_c0_g1	1240	TRINITY_DN862_c0_g1_i1;TRINITY_DN862_c0_g1_i2;TRINITY_DN862_c0_g1_i3;TRINITY_DN862_c0_g1_i4;TRINITY_DN862_c0_g1_i5	-	-	-	-	-	-	-	-	-	-	-	777.99	546.46	541.95	954.38	1770.43	1869.82	139.87	83.19	90.65	198.66	324.62	370.72	104.57	298	-1.60084	down	5.7549e-06	0.00191732	yes
TRINITY_DN9572_c0_g1	1942	TRINITY_DN9572_c0_g1_i1;TRINITY_DN9572_c0_g1_i2;TRINITY_DN9572_c0_g1_i3	PREDICTED: carbonic anhydrase 2-like isoform X2 [Megachile rotundata]	CA2	Carbonic anhydrase 2 OS=Oryctolagus cuniculus GN=CA2 PE=1 SV=3	GO:0004089(carbonate dehydratase activity);GO:0006730(one-carbon metabolic process);GO:0031233(intrinsic component of external side of plasma membrane)	COG3338(Carbonic anhydrase)	K01672	carbonic anhydrase	EC:4.2.1.1	ame00910(Nitrogen metabolism)	A0A088ATP0.1 PF00194.19;Carb_anhydrase;	-	1628.08	1369.95	1197.57	2190.44	3140.38	3469.99	68.55	52.94	51.29	106.3	160.33	192.81	57.59	153.15	-1.37093	down	7.9275e-06	0.00249692	yes
TRINITY_DN10087_c0_g2	2612	TRINITY_DN10087_c0_g2_i1	titin isoform N2-B [Mus musculus]	Ttn	Titin OS=Mus musculus GN=Ttn PE=1 SV=1	GO:0000166(nucleotide binding);GO:0000794(condensed nuclear chromosome);GO:0001701(in utero embryonic development);GO:0001756(somitogenesis);GO:0002020(protease binding);GO:0003007(heart morphogenesis);GO:0003300(cardiac muscle hypertrophy);GO:0004672(protein kinase activity);GO:0004674(protein serine/threonine kinase activity);GO:0004713(protein tyrosine kinase activity);GO:0005200(structural co…	ENOG410XQFD(myosin light chain kinase)	K12567	titin	EC:2.7.11.1	mmu05410(Hypertrophic cardiomyopathy (HCM));mmu05414(Dilated cardiomyopathy (DCM))	G1U9S3.1 PF07679.14;I-set;	-	167.03	96.29	78.33	0	1	0	4.8	2.55	2.3	0	0.04	0	3.22	0.01	7.71185	up	7.94817e-06	0.00249692	yes
TRINITY_DN9889_c0_g1	9575	TRINITY_DN9889_c0_g1_i1;TRINITY_DN9889_c0_g1_i10;TRINITY_DN9889_c0_g1_i11;TRINITY_DN9889_c0_g1_i12;TRINITY_DN9889_c0_g1_i13;TRINITY_DN9889_c0_g1_i14;TRINITY_DN9889_c0_g1_i15;TRINITY_DN9889_c0_g1_i16;TRINITY_DN9889_c0_g1_i17;TRINITY_DN9889_c0_g1_i18;TRINITY_DN9889_c0_g1_i19;TRINITY_DN9889_c0_g1_i20;TRINITY_DN9889_c0_g1_i21;TRINITY_DN9889_c0_g1_i22;TRINITY_DN9889_c0_g1_i23;TRINITY_DN9889_c0_g1_i24;…	PREDICTED: uncharacterized protein LOC100879380 isoform X1 [Megachile rotundata]	PRSS12	Neurotrypsin OS=Homo sapiens GN=PRSS12 PE=2 SV=2	GO:0004252(serine-type endopeptidase activity);GO:0005044(scavenger receptor activity);GO:0005576(extracellular region);GO:0006030(chitin metabolic process);GO:0006508(proteolysis);GO:0007614(short-term memory);GO:0007616(long-term memory);GO:0008061(chitin binding);GO:0016020(membrane);GO:0042593(glucose homeostasis);GO:0043567(regulation of insulin-like growth factor receptor signaling pathway)	COG5640(protease)	NA	NA	NA	-	F4X7R3.1 PF00089.24;Trypsin;	-	10812.8	9836.84	9733.81	15548.1	21460.9	26541.3	140.09	127.27	140.33	203.5	304.84	429.86	135.9	312.73	-1.36804	down	7.95343e-06	0.00249692	yes
TRINITY_DN1916_c1_g1	7310	TRINITY_DN1916_c1_g1_i1	PREDICTED: collagen alpha-1(IV) chain [Megachile rotundata]	-	Collagen alpha-2(IV) chain OS=Ascaris suum PE=2 SV=1	GO:0005198(structural molecule activity);GO:0005201(extracellular matrix structural constituent);GO:0005576(extracellular region);GO:0005581(collagen trimer);GO:0005587(collagen type IV trimer);GO:0005604(basement membrane);GO:0008104(protein localization);GO:0009792(embryo development ending in birth or egg hatching);GO:0016043(cellular component organization);GO:0030020(extracellular matrix str…	ENOG410XNMM(collagen, type)	K06237	collagen, type IV, alpha	-	pbar04512(ECM-receptor interaction);pbar04933(AGE-RAGE signaling pathway in diabetic complications)	F4W7A9.1 PF01413.17;C4;	-	15252.6	14050.4	14396.5	20117.7	35319.5	50869.7	138.28	118.28	134.55	211.56	409.16	645.77	130.37	422.16	-1.59128	down	8.64087e-06	0.00266155	yes
TRINITY_DN4251_c1_g1	2028	TRINITY_DN4251_c1_g1_i1;TRINITY_DN4251_c1_g1_i2	-	-	-	-	-	-	-	-	-	-	-	805.26	696.67	762	1382.77	1853.82	1398.83	31.68	25.18	30.58	63.08	89.13	73.25	29.15	75.15	-1.32217	down	9.67077e-06	0.00292362	yes
TRINITY_DN5755_c0_g1	6516	TRINITY_DN5755_c0_g1_i1;TRINITY_DN5755_c0_g1_i2;TRINITY_DN5755_c0_g1_i3;TRINITY_DN5755_c0_g1_i4;TRINITY_DN5755_c0_g1_i5	PREDICTED: uncharacterized protein LOC105565523 isoform X1 [Vollenhovia emeryi]	-	-	-	ENOG4111YKV(NA)	-	-	-	-	-	-	2638.22	2168.54	2590.44	4094.31	5252.64	4983.73	27.87	21.2	28.2	50.49	70.92	73.12	25.76	64.84	-1.24718	down	9.96719e-06	0.00295844	yes
TRINITY_DN2961_c0_g1	7056	TRINITY_DN2961_c0_g1_i1;TRINITY_DN2961_c0_g1_i10;TRINITY_DN2961_c0_g1_i11;TRINITY_DN2961_c0_g1_i12;TRINITY_DN2961_c0_g1_i13;TRINITY_DN2961_c0_g1_i14;TRINITY_DN2961_c0_g1_i15;TRINITY_DN2961_c0_g1_i16;TRINITY_DN2961_c0_g1_i18;TRINITY_DN2961_c0_g1_i19;TRINITY_DN2961_c0_g1_i2;TRINITY_DN2961_c0_g1_i20;TRINITY_DN2961_c0_g1_i21;TRINITY_DN2961_c0_g1_i22;TRINITY_DN2961_c0_g1_i23;TRINITY_DN2961_c0_g1_i24;T…	PREDICTED: uncharacterized protein LOC108547719 isoform X1 [Eufriesea mexicana]	-	-	GO:0022416(chaeta development);GO:0031672(A band);GO:0035220(wing disc development)	ENOG4111JGD(NA)	-	-	-	-	A0A087ZVB1.1 PF15929.3;Myofilin;	-	49119.3	43101.5	47521.8	74139.3	103384	95688.2	2131.46	1618.52	2085.27	3781.72	5889.65	6346.1	1945.08	5339.16	-1.26088	down	1.02073e-05	0.00297561	yes
TRINITY_DN25790_c0_g1	1653	TRINITY_DN25790_c0_g1_i1	unnamed protein product (mitochondrion) [Mus musculus]	Mtnd4	NADH-ubiquinone oxidoreductase chain 4 OS=Mus musculus GN=Mtnd4 PE=1 SV=1	GO:0003954(NADH dehydrogenase activity);GO:0005739(mitochondrion);GO:0005747(mitochondrial respiratory chain complex I);GO:0006120(mitochondrial electron transport, NADH to ubiquinone);GO:0007568(aging);GO:0008137(NADH dehydrogenase (ubiquinone) activity);GO:0009060(aerobic respiration);GO:0015990(electron transport coupled proton transport);GO:0016020(membrane);GO:0016021(integral component of m…	COG1008(subunit m)	K03881	NADH-ubiquinone oxidoreductase chain 4	EC:1.6.5.3	mmu00190(Oxidative phosphorylation);mmu04723(Retrograde endocannabinoid signaling);mmu04714(Thermogenesis);mmu05012(Parkinson disease)	Q7JCY6.1 PF00361.18;Proton_antipo_M;	-	3752.95	1369.67	1193.96	140	3	2	193.57	64.59	62.55	8.37	0.19	0.13	106.9	2.9	5.15331	up	1.03942e-05	0.00297693	yes
TRINITY_DN18687_c0_g1	4738	TRINITY_DN18687_c0_g1_i1;TRINITY_DN18687_c0_g1_i2;TRINITY_DN18687_c0_g1_i3;TRINITY_DN18687_c0_g1_i4;TRINITY_DN18687_c0_g1_i5;TRINITY_DN18687_c0_g1_i6	PREDICTED: AP-2 complex subunit alpha [Megachile rotundata]	alpha-Adaptin	AP-2 complex subunit alpha OS=Anopheles gambiae GN=alpha-Adaptin PE=3 SV=4	GO:0003674(molecular_function);GO:0005886(plasma membrane);GO:0005905(clathrin-coated pit);GO:0015031(protein transport);GO:0048488(synaptic vesicle endocytosis)	ENOG410XNQE(Adaptor-related protein complex 2, alpha)	K11824	AP-2 complex subunit alpha	-	bter04144(Endocytosis)	T1I007.1 PF01602.18;Adaptin_N;	-	1599.84	1465.73	1344.37	2288.49	3062.56	3361.63	39.43	37.31	33.96	63.47	76.46	78.76	36.9	72.9	-1.28325	down	1.17501e-05	0.00330726	yes
TRINITY_DN1562_c0_g1	2231	TRINITY_DN1562_c0_g1_i1;TRINITY_DN1562_c0_g1_i2;TRINITY_DN1562_c0_g1_i3;TRINITY_DN1562_c0_g1_i4;TRINITY_DN1562_c0_g1_i5;TRINITY_DN1562_c0_g1_i6;TRINITY_DN1562_c0_g1_i7	PREDICTED: uncharacterized protein LOC100875510 [Megachile rotundata]	-	-	-	ENOG410Z9T5(NA)	NA	NA	NA	-	-	-	33.32	3815.58	57.54	21	19	13	1.28	133.99	2.24	0.94	0.89	0.64	45.84	0.82	5.87543	up	1.26921e-05	0.00351184	yes
TRINITY_DN226_c0_g1	5318	TRINITY_DN226_c0_g1_i1;TRINITY_DN226_c0_g1_i10;TRINITY_DN226_c0_g1_i11;TRINITY_DN226_c0_g1_i12;TRINITY_DN226_c0_g1_i13;TRINITY_DN226_c0_g1_i14;TRINITY_DN226_c0_g1_i15;TRINITY_DN226_c0_g1_i16;TRINITY_DN226_c0_g1_i17;TRINITY_DN226_c0_g1_i18;TRINITY_DN226_c0_g1_i19;TRINITY_DN226_c0_g1_i2;TRINITY_DN226_c0_g1_i20;TRINITY_DN226_c0_g1_i21;TRINITY_DN226_c0_g1_i22;TRINITY_DN226_c0_g1_i23;TRINITY_DN226_c0_…	PREDICTED: sodium-coupled monocarboxylate transporter 1 [Megachile rotundata]	SLC5A12	Sodium-coupled monocarboxylate transporter 2 OS=Homo sapiens GN=SLC5A12 PE=2 SV=2	GO:0005887(integral component of plasma membrane);GO:0015293(symporter activity)	COG0591(symporter)	NA	NA	NA	-	A0A088AGB8.1 PF00474.15;SSF;	-	1577.05	1494.9	1456.17	2351.02	2936.52	4919.33	24.49	21.66	22.07	40.86	56.11	100.99	22.74	65.99	-1.48443	down	1.31538e-05	0.00357894	yes
TRINITY_DN14773_c0_g1	605	TRINITY_DN14773_c0_g1_i1	fatty acid-binding protein, heart [Mus musculus]	Fabp3	Fatty acid-binding protein, heart OS=Mus musculus GN=Fabp3 PE=1 SV=5	GO:0005324(long-chain fatty acid transporter activity);GO:0005504(fatty acid binding);GO:0005615(extracellular space);GO:0005737(cytoplasm);GO:0005829(cytosol);GO:0008092(cytoskeletal protein binding);GO:0008289(lipid binding);GO:0015909(long-chain fatty acid transport);GO:0016528(sarcoplasm);GO:0036041(long-chain fatty acid binding);GO:0042632(cholesterol homeostasis);GO:0044539(long-chain fatty…	ENOG4111US8(acid binding protein)	K08752	fatty acid-binding protein 3, muscle and heart	-	mmu03320(PPAR signaling pathway)	P07483.2 PF00061.21;Lipocalin;	-	136.07	59.88	58.01	0	0	0	45.11	17.58	18.5	0	0	0	27.06	0	9.26299	up	1.36145e-05	0.00364356	yes
TRINITY_DN322_c0_g1	1436	TRINITY_DN322_c0_g1_i1;TRINITY_DN322_c0_g1_i10;TRINITY_DN322_c0_g1_i11;TRINITY_DN322_c0_g1_i12;TRINITY_DN322_c0_g1_i13;TRINITY_DN322_c0_g1_i14;TRINITY_DN322_c0_g1_i15;TRINITY_DN322_c0_g1_i16;TRINITY_DN322_c0_g1_i17;TRINITY_DN322_c0_g1_i18;TRINITY_DN322_c0_g1_i19;TRINITY_DN322_c0_g1_i2;TRINITY_DN322_c0_g1_i20;TRINITY_DN322_c0_g1_i21;TRINITY_DN322_c0_g1_i22;TRINITY_DN322_c0_g1_i23;TRINITY_DN322_c0_…	PREDICTED: endoglucanase-like [Eufriesea mexicana]	-	-	-	-	-	-	-	-	-	-	877.17	798.06	1185	1242.19	2436.01	9622.22	99.26	84.17	134.9	150.72	296.53	1251.78	106.11	566.34	-2.54948	down	1.60629e-05	0.00422946	yes
TRINITY_DN265_c0_g1	4543	TRINITY_DN265_c0_g1_i1;TRINITY_DN265_c0_g1_i2	PREDICTED: serine/threonine-protein kinase svkA isoform X2 [Megachile rotundata]	STK26	Serine/threonine-protein kinase 26 OS=Homo sapiens GN=STK26 PE=1 SV=2	GO:0000278(mitotic cell cycle);GO:0005737(cytoplasm);GO:0006915(apoptotic process);GO:0045595(regulation of cell differentiation)	ENOG410XP9G(mitogen-activated protein kinase kinase kinase kinase)	NA	NA	NA	-	T1J4U9.1 PF00069.23;Pkinase;	-	2616.59	2294.5	2374.96	3473.79	5259.37	5964.23	42.33	34.29	39.38	65.04	107.63	133.3	38.67	101.99	-1.31309	down	1.7367e-05	0.00450026	yes
TRINITY_DN17174_c0_g1	486	TRINITY_DN17174_c0_g1_i1;TRINITY_DN17174_c0_g1_i2;TRINITY_DN17174_c0_g1_i3;TRINITY_DN17174_c0_g1_i4	COLlagen [Caenorhabditis elegans]	col-155	Putative cuticle collagen 155 OS=Caenorhabditis elegans GN=col-155 PE=3 SV=3	GO:0042302(structural constituent of cuticle)	ENOG410YHSS(structural constituent of cuticle)	-	-	-	-	Q18302.1 PF01484.15;Col_cuticle_N;	-	72.97	73.16	68.6	0	0	0	42.2	44.72	42.86	0	0	0	43.26	0	9.02655	up	1.97306e-05	0.00503284	yes
TRINITY_DN225_c0_g1	15057	TRINITY_DN225_c0_g1_i1;TRINITY_DN225_c0_g1_i10;TRINITY_DN225_c0_g1_i11;TRINITY_DN225_c0_g1_i12;TRINITY_DN225_c0_g1_i13;TRINITY_DN225_c0_g1_i14;TRINITY_DN225_c0_g1_i15;TRINITY_DN225_c0_g1_i16;TRINITY_DN225_c0_g1_i17;TRINITY_DN225_c0_g1_i18;TRINITY_DN225_c0_g1_i19;TRINITY_DN225_c0_g1_i2;TRINITY_DN225_c0_g1_i20;TRINITY_DN225_c0_g1_i21;TRINITY_DN225_c0_g1_i22;TRINITY_DN225_c0_g1_i23;TRINITY_DN225_c0_…	PREDICTED: titin [Habropoda laboriosa]	Ttn	Titin OS=Mus musculus GN=Ttn PE=1 SV=1	GO:0003779(actin binding);GO:0005515(protein binding);GO:0030018(Z disc);GO:0031430(M band)	ENOG410ZVAD(IGc2)	NA	NA	NA	-	A0A088A9C6.1 PF07679.14;I-set;	-	6133.37	4508.65	6898.62	8795.78	13567.8	13922.5	65.82	46.39	76.43	92.39	158.04	192.92	62.88	147.78	-1.3413	down	2.14854e-05	0.00539614	yes
TRINITY_DN948_c0_g1	8129	TRINITY_DN948_c0_g1_i1;TRINITY_DN948_c0_g1_i10;TRINITY_DN948_c0_g1_i11;TRINITY_DN948_c0_g1_i12;TRINITY_DN948_c0_g1_i13;TRINITY_DN948_c0_g1_i14;TRINITY_DN948_c0_g1_i15;TRINITY_DN948_c0_g1_i16;TRINITY_DN948_c0_g1_i17;TRINITY_DN948_c0_g1_i18;TRINITY_DN948_c0_g1_i19;TRINITY_DN948_c0_g1_i2;TRINITY_DN948_c0_g1_i20;TRINITY_DN948_c0_g1_i21;TRINITY_DN948_c0_g1_i22;TRINITY_DN948_c0_g1_i3;TRINITY_DN948_c0_g…	PREDICTED: flocculation protein FLO11, partial [Apis cerana]	sty	Protein sprouty OS=Drosophila melanogaster GN=sty PE=1 SV=2	GO:0001745(compound eye morphogenesis);GO:0001763(morphogenesis of a branching structure);GO:0005622(intracellular);GO:0005829(cytosol);GO:0005886(plasma membrane);GO:0007169(transmembrane receptor protein tyrosine kinase signaling pathway);GO:0007424(open tracheal system development);GO:0007426(tracheal outgrowth, open tracheal system);GO:0007429(secondary branching, open tracheal system);GO:000…	ENOG4111S05(Sprouty homolog)	K17383	protein sprouty homolog 2	-	bter04013(MAPK signaling pathway - fly)	A0A088AIB3.1 PF05210.11;Sprouty;	zf-GATA	2569.08	2213.5	2797.05	3386.15	5596.84	7781.02	47.24	38.15	54.56	73.74	132.8	196.83	46.65	134.46	-1.44933	down	2.53289e-05	0.00626506	yes
TRINITY_DN3702_c0_g1	12007	TRINITY_DN3702_c0_g1_i1;TRINITY_DN3702_c0_g1_i2	PREDICTED: hemocytin [Megachile rotundata]	-	Hemocytin OS=Bombyx mori PE=2 SV=1	GO:0005576(extracellular region);GO:0006030(chitin metabolic process);GO:0007599(hemostasis);GO:0008061(chitin binding);GO:0035006(melanization defense response);GO:0042060(wound healing);GO:0042381(hemolymph coagulation);GO:0042803(protein homodimerization activity)	ENOG410XNSK(oligomeric mucus gel-forming)	K03900	von Willebrand factor	-	mde04512(ECM-receptor interaction)	A0A087ZSR0.1 PF00094.23;VWD;	-	1804.39	1790.62	1661.25	2454.49	3573.59	4838.83	15.55	14.85	14.53	22.12	34.76	55.78	14.98	37.55	-1.35488	down	2.57925e-05	0.0062845	yes
TRINITY_DN17969_c0_g1	4066	TRINITY_DN17969_c0_g1_i1;TRINITY_DN17969_c0_g1_i2	PREDICTED: leucine-rich repeat neuronal protein 1-like [Eufriesea mexicana]	-	-	-	COG4886(leucine Rich Repeat)	K10170	toll-like receptor 8	-	cpic04620(Toll-like receptor signaling pathway)	A0A088AE67.1 PF13855.4;LRR_8;	-	1812.63	1795.83	1755.17	3477.55	3370.99	2874.44	31.17	28.59	31.02	69.35	73.17	68.25	30.26	70.26	-1.14956	down	2.72823e-05	0.00654977	yes
TRINITY_DN628_c0_g1	5585	TRINITY_DN628_c0_g1_i1	-	-	-	-	-	-	-	-	-	-	-	1445.43	1582.93	1029.53	2007.88	2889.52	3324.67	17.5	17.78	12.84	28.2	44.51	56.08	16.04	42.93	-1.32576	down	2.7741e-05	0.00656336	yes
TRINITY_DN16460_c0_g1	2671	TRINITY_DN16460_c0_g1_i1	PREDICTED: poly(U)-specific endoribonuclease homolog isoform X2 [Eufriesea mexicana]	CG2145	Poly(U)-specific endoribonuclease homolog OS=Drosophila melanogaster GN=CG2145 PE=2 SV=1	GO:0003723(RNA binding);GO:0004521(endoribonuclease activity);GO:0005575(cellular_component);GO:0090502(RNA phosphodiester bond hydrolysis, endonucleolytic)	ENOG410XX8E(Poly(U)-specific)	NA	NA	NA	-	A0A088AM28.1 PF09412.8;XendoU;	-	6876.65	7539.69	5717.42	9788.86	12812	17654	192.36	194.49	163.78	317.5	445.24	669.67	183.54	477.47	-1.30918	down	3.13744e-05	0.00717817	yes
TRINITY_DN2931_c0_g1	7819	TRINITY_DN2931_c0_g1_i1;TRINITY_DN2931_c0_g1_i2;TRINITY_DN2931_c0_g1_i3	-	-	-	-	-	-	-	-	-	-	-	4193.51	3900.36	3596.31	5546.38	7771.8	8288.39	35.4	30.57	31.35	54.35	83.92	98.11	32.44	78.79	-1.18632	down	3.15789e-05	0.00717817	yes
TRINITY_DN5328_c0_g1	1593	TRINITY_DN5328_c0_g1_i1;TRINITY_DN5328_c0_g1_i2;TRINITY_DN5328_c0_g1_i3;TRINITY_DN5328_c0_g1_i4;TRINITY_DN5328_c0_g1_i5	PREDICTED: uncharacterized protein LOC108549775 [Eufriesea mexicana]	Chrna3	Neuronal acetylcholine receptor subunit alpha-3 OS=Mus musculus GN=Chrna3 PE=2 SV=1	GO:0005892(acetylcholine-gated channel complex);GO:0007271(synaptic transmission, cholinergic);GO:0015464(acetylcholine receptor activity);GO:0042166(acetylcholine binding)	ENOG410XQGR(cholinergic receptor, nicotinic)	K09525	DnaJ homolog subfamily C member 5	-	dpl04141(Protein processing in endoplasmic reticulum)	A0A088AP81.1 PF02931.21;Neur_chan_LBD;	-	86	116	152.02	526	786	308	4.89	6.55	8.84	35.11	53.97	22.87	6.76	37.32	-2.46128	down	3.16587e-05	0.00717817	yes
TRINITY_DN24841_c0_g1	1560	TRINITY_DN24841_c0_g1_i1;TRINITY_DN24841_c0_g1_i2;TRINITY_DN24841_c0_g1_i3	PREDICTED: phosphate carrier protein, mitochondrial [Megachile rotundata]	SLC25A3	Phosphate carrier protein, mitochondrial OS=Homo sapiens GN=SLC25A3 PE=1 SV=2	GO:0005740(mitochondrial envelope);GO:0005743(mitochondrial inner membrane);GO:0006817(phosphate ion transport);GO:0006839(mitochondrial transport);GO:0015114(phosphate ion transmembrane transporter activity);GO:0016021(integral component of membrane);GO:0022857(transmembrane transporter activity)	ENOG410XPST(Phosphate carrier protein)	NA	NA	NA	-	A0A088ASM4.1 PF00153.25;Mito_carr;	-	54354.6	49401	41875.5	85267.3	94029.3	82859	3214.18	2664.99	2512.39	5807.83	6549.77	6265.06	2797.19	6207.55	-1.14346	down	3.21984e-05	0.00720053	yes
TRINITY_DN27560_c0_g1	7175	TRINITY_DN27560_c0_g1_i1	PREDICTED: collagen alpha-2(IV) chain isoform X2 [Megachile rotundata]	Col4a1	Collagen alpha-1(IV) chain OS=Mus musculus GN=Col4a1 PE=1 SV=4	GO:0001525(angiogenesis);GO:0001569(branching involved in blood vessel morphogenesis);GO:0005201(extracellular matrix structural constituent);GO:0005576(extracellular region);GO:0005581(collagen trimer);GO:0005587(collagen type IV trimer);GO:0005604(basement membrane);GO:0005615(extracellular space);GO:0007420(brain development);GO:0007528(neuromuscular junction development);GO:0031012(extracellu…	ENOG410XNMM(collagen, type)	K06237	collagen, type IV, alpha	-	ame04512(ECM-receptor interaction);ame04933(AGE-RAGE signaling pathway in diabetic complications)	A0A088A3U7.1 PF01413.17;C4;	-	10703.2	10331.6	10262.5	13026.1	23719.9	37839.3	98.98	88.71	97.83	139.73	280.22	489.84	95.17	303.26	-1.56517	down	3.35153e-05	0.00739374	yes
TRINITY_DN401_c0_g1	3857	TRINITY_DN401_c0_g1_i1;TRINITY_DN401_c0_g1_i10;TRINITY_DN401_c0_g1_i11;TRINITY_DN401_c0_g1_i12;TRINITY_DN401_c0_g1_i13;TRINITY_DN401_c0_g1_i14;TRINITY_DN401_c0_g1_i15;TRINITY_DN401_c0_g1_i16;TRINITY_DN401_c0_g1_i17;TRINITY_DN401_c0_g1_i18;TRINITY_DN401_c0_g1_i19;TRINITY_DN401_c0_g1_i2;TRINITY_DN401_c0_g1_i20;TRINITY_DN401_c0_g1_i21;TRINITY_DN401_c0_g1_i22;TRINITY_DN401_c0_g1_i23;TRINITY_DN401_c0_…	protein yippee-like 1 isoform X1 [Bombus impatiens]	YPEL1	Protein yippee-like 1 OS=Chlorocebus aethiops GN=YPEL1 PE=3 SV=1	GO:0005634(nucleus);GO:0046872(metal ion binding)	ENOG4111VJ1(Yippee-like)	NA	NA	NA	-	E5SCW4.1 PF03226.12;Yippee-Mis18;	-	1087.5	950.22	967.51	1661.61	1833.78	2135.72	67	53.33	61.14	124.49	138.72	176.32	60.49	146.51	-1.20592	down	3.45264e-05	0.00751525	yes
TRINITY_DN20472_c0_g1	4645	TRINITY_DN20472_c0_g1_i1;TRINITY_DN20472_c0_g1_i2;TRINITY_DN20472_c0_g1_i3;TRINITY_DN20472_c0_g1_i4;TRINITY_DN20472_c0_g1_i5;TRINITY_DN20472_c0_g1_i6;TRINITY_DN20472_c0_g1_i8;TRINITY_DN20472_c0_g1_i9	PREDICTED: DDB1- and CUL4-associated factor 6-like isoform X2 [Megachile rotundata]	DCAF6	DDB1- and CUL4-associated factor 6 OS=Homo sapiens GN=DCAF6 PE=1 SV=1	GO:0005634(nucleus);GO:0005737(cytoplasm);GO:0005925(focal adhesion);GO:0030374(ligand-dependent nuclear receptor transcription coactivator activity);GO:0045944(positive regulation of transcription by RNA polymerase II);GO:0080008(Cul4-RING E3 ubiquitin ligase complex)	ENOG410XQZP(ddb1 and cul4 associated factor)	NA	NA	NA	-	H3AJ19.1 PF12894.5;ANAPC4_WD40;	-	2027.6	1774.79	1931.57	2421.71	4386.93	5065.5	37.42	30.88	36.47	51.22	98.27	124.66	34.92	91.38	-1.35136	down	3.74165e-05	0.00803717	yes
TRINITY_DN3188_c1_g1	2599	TRINITY_DN3188_c1_g1_i1	-	-	-	-	-	-	-	-	-	-	-	605.95	448.07	553.65	751.97	1514.98	1425.93	17.52	11.94	16.39	25.21	54.34	55.81	15.28	45.12	-1.49378	down	3.85446e-05	0.00817196	yes
TRINITY_DN484_c0_g1	5618	TRINITY_DN484_c0_g1_i1	PREDICTED: transcription factor AP-1 [Megachile rotundata]	JUN	Transcription factor AP-1 OS=Serinus canaria GN=JUN PE=2 SV=1	GO:0000122(negative regulation of transcription by RNA polymerase II);GO:0000790(nuclear chromatin);GO:0000978(RNA polymerase II proximal promoter sequence-specific DNA binding);GO:0000981(RNA polymerase II transcription factor activity, sequence-specific DNA binding);GO:0003713(transcription coactivator activity);GO:0005667(transcription factor complex);GO:0008134(transcription factor binding);G…	ENOG410XRWH(proto-oncogene)	K04448	transcription factor AP-1	-	ame04013(MAPK signaling pathway - fly);ame04310(Wnt signaling pathway);ame04137(Mitophagy - animal);ame04214(Apoptosis - fly);ame04624(Toll and Imd signaling pathway);ame04933(AGE-RAGE signaling pathway in diabetic complications)	A0A088ANX5.1 PF03957.11;Jun;	TF_bZIP	4413.98	4031.47	4305.42	6811.57	7575.16	7915.8	53.11	44.99	53.35	95.06	115.95	132.69	50.48	114.57	-1.10307	down	3.93071e-05	0.00822678	yes
TRINITY_DN246_c0_g1	8252	TRINITY_DN246_c0_g1_i1;TRINITY_DN246_c0_g1_i2;TRINITY_DN246_c0_g1_i3;TRINITY_DN246_c0_g1_i4;TRINITY_DN246_c0_g1_i5;TRINITY_DN246_c0_g1_i6;TRINITY_DN246_c0_g1_i7;TRINITY_DN246_c0_g1_i8	PREDICTED: delta-1-pyrroline-5-carboxylate synthase isoform X1 [Megachile rotundata]	ALDH18A1	Delta-1-pyrroline-5-carboxylate synthase OS=Homo sapiens GN=ALDH18A1 PE=1 SV=2	GO:0004349(glutamate 5-kinase activity);GO:0004350(glutamate-5-semialdehyde dehydrogenase activity);GO:0005739(mitochondrion);GO:0005743(mitochondrial inner membrane);GO:0006561(proline biosynthetic process);GO:0007293(germarium-derived egg chamber formation);GO:0017084(delta1-pyrroline-5-carboxylate synthetase activity);GO:0055114(oxidation-reduction process);GO:0060429(epithelium development)	COG0014(Catalyzes the NADPH dependent reduction of L-gamma- glutamyl 5-phosphate into L-glutamate 5-semialdehyde and phosphate. The product spontaneously undergoes cyclization to form 1-pyrroline-5-carboxylate (By similarity));COG0263(Catalyzes the transfer of a phosphate group to glutamate to form glutamate 5-phosphate which rapidly cyclizes to 5- oxoproline (By similarity))	K12657	delta-1-pyrroline-5-carboxylate synthetase	EC:2.7.2.11 1.2.1.41	bter00330(Arginine and proline metabolism)	A0A088A822.1 PF00171.20;Aldedh;	-	24630.6	25690	22235.7	32571.4	50418	62854.9	543.24	536.14	507.94	827.79	1397.58	1908.12	529.11	1377.83	-1.31302	down	4.06233e-05	0.00839462	yes
TRINITY_DN26801_c0_g1	785	TRINITY_DN26801_c0_g1_i1	cysteine and glycine-rich protein 3 [Cricetulus griseus]	Csrp3	Cysteine and glycine-rich protein 3 OS=Mus musculus GN=Csrp3 PE=1 SV=1	GO:0002026(regulation of the force of heart contraction);GO:0003300(cardiac muscle hypertrophy);GO:0003779(actin binding);GO:0005515(protein binding);GO:0005634(nucleus);GO:0005737(cytoplasm);GO:0005856(cytoskeleton);GO:0006351(transcription, DNA-templated);GO:0006355(regulation of transcription, DNA-templated);GO:0006874(cellular calcium ion homeostasis);GO:0007275(multicellular organism develop…	ENOG410Z840(Cysteine and glycine-rich protein 3 (Cardiac LIM protein))	NA	NA	NA	-	G3TKW3.1 PF00412.20;LIM;	-	86	40	50	0	0	0	15.67	6.4	8.87	0	0	0	10.31	0	8.73838	up	4.24758e-05	0.00866771	yes
TRINITY_DN3061_c0_g5	12087	TRINITY_DN3061_c0_g5_i1;TRINITY_DN3061_c0_g5_i10;TRINITY_DN3061_c0_g5_i11;TRINITY_DN3061_c0_g5_i12;TRINITY_DN3061_c0_g5_i13;TRINITY_DN3061_c0_g5_i14;TRINITY_DN3061_c0_g5_i15;TRINITY_DN3061_c0_g5_i16;TRINITY_DN3061_c0_g5_i17;TRINITY_DN3061_c0_g5_i18;TRINITY_DN3061_c0_g5_i2;TRINITY_DN3061_c0_g5_i3;TRINITY_DN3061_c0_g5_i4;TRINITY_DN3061_c0_g5_i5;TRINITY_DN3061_c0_g5_i6;TRINITY_DN3061_c0_g5_i7;TRINIT…	PREDICTED: papilin isoform X6 [Megachile rotundata]	Ppn	Papilin OS=Drosophila melanogaster GN=Ppn PE=1 SV=2	GO:0004222(metalloendopeptidase activity);GO:0004867(serine-type endopeptidase inhibitor activity);GO:0005201(extracellular matrix structural constituent);GO:0005604(basement membrane);GO:0008270(zinc ion binding);GO:0030198(extracellular matrix organization)	ENOG410XQNP(serine peptidase inhibitor, Kunitz type)	NA	NA	NA	-	A0A088A656.1 PF05986.12;ADAM_spacer1;	-	690.01	747.21	658.47	1049.61	1548	1544.6	4.86	4.98	4.57	7.81	12.68	14.32	4.8	11.6	-1.28207	down	4.42567e-05	0.00891964	yes
TRINITY_DN3962_c1_g1	7451	TRINITY_DN3962_c1_g1_i1;TRINITY_DN3962_c1_g1_i2;TRINITY_DN3962_c1_g1_i3;TRINITY_DN3962_c1_g1_i4;TRINITY_DN3962_c1_g1_i5	PREDICTED: ribosomal protein S6 kinase alpha-5 isoform X2 [Megachile rotundata]	RPS6KA5	Ribosomal protein S6 kinase alpha-5 OS=Gallus gallus GN=RPS6KA5 PE=2 SV=1	GO:0005634(nucleus);GO:0005737(cytoplasm);GO:0035175(histone kinase activity (H3-S10 specific));GO:0035556(intracellular signal transduction);GO:0043987(histone H3-S10 phosphorylation);GO:0043988(histone H3-S28 phosphorylation);GO:0045944(positive regulation of transcription by RNA polymerase II)	ENOG410XNPH(protein serine/threonine kinase activity)	NA	NA	NA	-	A0A087ZP94.1 PF00069.23;Pkinase;	-	1102	815.11	1028.61	1491.89	1966.83	2308.16	13.89	11.44	13.38	19.66	31.33	41.07	12.9	30.69	-1.26787	down	4.92967e-05	0.00975212	yes
TRINITY_DN4872_c0_g3	2359	TRINITY_DN4872_c0_g3_i1	PREDICTED: transferrin [Megachile rotundata]	-	Transferrin OS=Blaberus discoidalis PE=1 SV=1	GO:0005047(signal recognition particle binding);GO:0005576(extracellular region);GO:0005615(extracellular space);GO:0005785(signal recognition particle receptor complex);GO:0005886(plasma membrane);GO:0009620(response to fungus);GO:0042048(olfactory behavior)	ENOG410XQ36(antigen p97 (melanoma associated) identified by monoclonal antibodies 133.2 and 96.5)	NA	NA	NA	-	A0A088AFH7.1 PF00405.15;Transferrin;	-	7693.98	6524.94	7271.26	8087.83	17883.7	27449.6	250.33	195.45	241.89	305.1	718.08	1201.95	229.22	741.71	-1.62469	down	4.9582e-05	0.00975212	yes
TRINITY_DN239_c0_g1	2641	TRINITY_DN239_c0_g1_i1;TRINITY_DN239_c0_g1_i2;TRINITY_DN239_c0_g1_i3;TRINITY_DN239_c0_g1_i4;TRINITY_DN239_c0_g1_i5;TRINITY_DN239_c0_g1_i6;TRINITY_DN239_c0_g1_i7;TRINITY_DN239_c0_g1_i8;TRINITY_DN239_c0_g1_i9	PREDICTED: ankyrin-3-like [Megachile rotundata]	-	-	-	COG0666(Ankyrin Repeat)	-	-	-	-	T1HSD4.1 PF12796.5;Ank_2;	-	850.31	719.18	732.85	1253.13	1604.03	1433.61	42.02	28.7	30.47	64.47	89.18	74.39	33.73	76.01	-1.19209	down	5.57439e-05	0.0106337	yes
TRINITY_DN1002_c0_g2	7267	TRINITY_DN1002_c0_g2_i1;TRINITY_DN1002_c0_g2_i2;TRINITY_DN1002_c0_g2_i3;TRINITY_DN1002_c0_g2_i4	PREDICTED: titin isoform X1 [Megachile rotundata]	NELFE	Negative elongation factor E OS=Bos taurus GN=NELFE PE=2 SV=1	GO:0000398(mRNA splicing, via spliceosome);GO:0003676(nucleic acid binding);GO:0005634(nucleus)	ENOG41126VV(NA)	NA	NA	NA	-	-	-	7834.75	6244.09	8261.05	10278.7	15903.2	17095.8	87.99	64.98	95.36	134.27	228.1	268.89	82.78	210.42	-1.24991	down	5.60038e-05	0.0106337	yes
TRINITY_DN26275_c0_g1	273	TRINITY_DN26275_c0_g1_i1	-	-	-	-	-	-	-	-	-	-	-	1.46	0	2.11	0	251.68	642.64	1.64	0	2.41	0	395.25	1089.48	1.35	494.91	-8.35396	down	5.63386e-05	0.0106337	yes
TRINITY_DN2023_c0_g1	6790	TRINITY_DN2023_c0_g1_i1;TRINITY_DN2023_c0_g1_i2;TRINITY_DN2023_c0_g1_i3	PREDICTED: RB1-inducible coiled-coil protein 1 isoform X1 [Megachile rotundata]	RB1CC1	RB1-inducible coiled-coil protein 1 OS=Homo sapiens GN=RB1CC1 PE=1 SV=3	GO:0000045(autophagosome assembly);GO:0001934(positive regulation of protein phosphorylation);GO:0019901(protein kinase binding);GO:0034045(phagophore assembly site membrane);GO:1990316(Atg1/ULK1 kinase complex)	ENOG410XSY4(RB1-inducible coiled-coil 1)	K17589	RB1-inducible coiled-coil protein 1	-	bim04140(Autophagy - animal)	A0A088A1N7.1 PF10377.7;ATG11;	-	1780.28	1548.7	1938.61	2295.97	3764.18	4790.44	19.27	15.92	21.74	28.59	51.29	71.7	18.98	50.53	-1.34393	down	5.66698e-05	0.0106337	yes
TRINITY_DN4483_c0_g1	780	TRINITY_DN4483_c0_g1_i1	PREDICTED: actin, clone 205-like isoform X1 [Apis florea]	-	Actin, muscle OS=Manduca sexta PE=2 SV=1	GO:0000281(mitotic cytokinesis);GO:0005200(structural constituent of cytoskeleton);GO:0005884(actin filament);GO:0005886(plasma membrane);GO:0007010(cytoskeleton organization);GO:0007507(heart development);GO:0050807(regulation of synapse organization);GO:0098529(neuromuscular junction development, skeletal muscle fiber)	COG5277(Actin-related protein)	K05692	actin beta/gamma 1	-	aga04391(Hippo signaling pathway -fly);aga04145(Phagosome);aga04745(Phototransduction - fly)	A0A0B2VWK9.1 PF00022.17;Actin;	-	321.63	251.42	396.44	527.71	906.31	1101.96	59.42	40.75	71.3	112.82	168.26	218.17	57.16	166.42	-1.6849	down	5.76629e-05	0.0106971	yes
TRINITY_DN3301_c0_g2	911	TRINITY_DN3301_c0_g2_i1	actin [Daphnia magna]	-	Actin, clone 211 OS=Artemia sp. PE=2 SV=1	GO:0005200(structural constituent of cytoskeleton);GO:0005884(actin filament);GO:0006909(phagocytosis);GO:0007010(cytoskeleton organization);GO:0014866(skeletal myofibril assembly);GO:0071689(muscle thin filament assembly)	COG5277(Actin-related protein)	K05692	actin beta/gamma 1	-	rro04015(Rap1 signaling pathway);rro04390(Hippo signaling pathway);rro04145(Phagosome);rro04210(Apoptosis);rro04510(Focal adhesion);rro04520(Adherens junction);rro04530(Tight junction);rro04810(Regulation of actin cytoskeleton);rro04611(Platelet activation);rro04670(Leukocyte transendothelial migration);rro04921(Oxytocin signaling pathway);rro04919(Thyroid hormone signaling pathway);rro04714(Ther…	W5JTF2.1 PF00022.17;Actin;	-	696.95	668.04	842.5	1012.13	1774.89	1817.2	93.3	79.45	111.39	156.78	255.1	280.02	94.71	230.63	-1.35537	down	6.09064e-05	0.0111719	yes
TRINITY_DN12388_c0_g2	1092	TRINITY_DN12388_c0_g2_i1	NADH dehydrogenase subunit 5 (mitochondrion) [Osmia excavata]	ND5	NADH-ubiquinone oxidoreductase chain 5 OS=Locusta migratoria GN=ND5 PE=3 SV=1	GO:0008137(NADH dehydrogenase (ubiquinone) activity);GO:0042773(ATP synthesis coupled electron transport)	COG1009(subunit l)	K03883	NADH-ubiquinone oxidoreductase chain 5	EC:1.6.5.3	fcd00190(Oxidative phosphorylation)	E3VRV1.1 PF00361.18;Proton_antipo_M;	-	606.81	518.74	436.12	1346.82	2423.42	573.24	58.5	45	42.05	150.35	263.77	67.26	48.52	160.46	-1.74338	down	6.41353e-05	0.0116334	yes
TRINITY_DN1757_c1_g1	5877	TRINITY_DN1757_c1_g1_i1;TRINITY_DN1757_c1_g1_i2;TRINITY_DN1757_c1_g1_i3;TRINITY_DN1757_c1_g1_i4;TRINITY_DN1757_c1_g1_i5;TRINITY_DN1757_c1_g1_i6	PREDICTED: protein purity of essence isoform X1 [Megachile rotundata]	poe	Protein purity of essence OS=Drosophila melanogaster GN=poe PE=1 SV=1	GO:0004842(ubiquitin-protein transferase activity);GO:0005516(calmodulin binding);GO:0005654(nucleoplasm);GO:0005813(centrosome);GO:0005829(cytosol);GO:0007286(spermatid development);GO:0007291(sperm individualization);GO:0008270(zinc ion binding);GO:0016020(membrane);GO:0042065(glial cell growth);GO:0042066(perineurial glial growth);GO:0043186(P granule)	ENOG410ZXQI(Putative zinc finger in N-recognin (UBR box))	NA	NA	NA	-	A0A088AK76.1 PF02207.18;zf-UBR;	-	796.26	491.84	774.9	1118.35	1523.77	1604.3	9.24	5.29	9.26	15.03	22.51	25.96	7.93	21.17	-1.3348	down	6.64192e-05	0.0118266	yes
TRINITY_DN1398_c0_g1	20016	TRINITY_DN1398_c0_g1_i1;TRINITY_DN1398_c0_g1_i10;TRINITY_DN1398_c0_g1_i11;TRINITY_DN1398_c0_g1_i13;TRINITY_DN1398_c0_g1_i14;TRINITY_DN1398_c0_g1_i15;TRINITY_DN1398_c0_g1_i16;TRINITY_DN1398_c0_g1_i17;TRINITY_DN1398_c0_g1_i18;TRINITY_DN1398_c0_g1_i19;TRINITY_DN1398_c0_g1_i2;TRINITY_DN1398_c0_g1_i20;TRINITY_DN1398_c0_g1_i21;TRINITY_DN1398_c0_g1_i22;TRINITY_DN1398_c0_g1_i23;TRINITY_DN1398_c0_g1_i24;T…	PREDICTED: muscle M-line assembly protein unc-89-like isoform X1 [Megachile rotundata]	unc-89	Muscle M-line assembly protein unc-89 OS=Caenorhabditis elegans GN=unc-89 PE=1 SV=3	GO:0004672(protein kinase activity);GO:0004674(protein serine/threonine kinase activity);GO:0005089(Rho guanyl-nucleotide exchange factor activity);GO:0005515(protein binding);GO:0005523(tropomyosin binding);GO:0005524(ATP binding);GO:0006468(protein phosphorylation);GO:0007527(adult somatic muscle development);GO:0019901(protein kinase binding);GO:0031430(M band);GO:0035023(regulation of Rho pro…	ENOG410XQFD(myosin light chain kinase)	NA	NA	NA	-	A0A088A5W9.1 PF00069.23;Pkinase;	-	13324.1	9272.64	14138.9	16937.9	27317.7	30722.1	95.65	63.3	104.66	149.82	269.98	317.27	87.87	245.69	-1.32522	down	6.66493e-05	0.0118266	yes
TRINITY_DN12205_c0_g2	1882	TRINITY_DN12205_c0_g2_i1;TRINITY_DN12205_c0_g2_i2	unnamed protein product [Mus musculus]	DES	Desmin OS=Sus scrofa GN=DES PE=1 SV=4	GO:0005198(structural molecule activity);GO:0005882(intermediate filament);GO:0005916(fascia adherens);GO:0008092(cytoskeletal protein binding);GO:0014704(intercalated disc);GO:0030018(Z disc);GO:0031594(neuromuscular junction);GO:0042383(sarcolemma);GO:0042802(identical protein binding);GO:0045109(intermediate filament organization);GO:0070062(extracellular exosome)	ENOG410XRBS(vimentin)	K07610	desmin	-	ssc05410(Hypertrophic cardiomyopathy (HCM));ssc05412(Arrhythmogenic right ventricular cardiomyopathy (ARVC));ssc05414(Dilated cardiomyopathy (DCM))	H3BAT7.1 PF00038.19;Filament;	-	198	117.13	106	4	0	1	8.58	4.66	4.68	0.2	0	0.06	5.97	0.09	6.00193	up	6.7537e-05	0.0118417	yes
TRINITY_DN332_c0_g2	6028	TRINITY_DN332_c0_g2_i1;TRINITY_DN332_c0_g2_i10;TRINITY_DN332_c0_g2_i11;TRINITY_DN332_c0_g2_i12;TRINITY_DN332_c0_g2_i13;TRINITY_DN332_c0_g2_i14;TRINITY_DN332_c0_g2_i2;TRINITY_DN332_c0_g2_i3;TRINITY_DN332_c0_g2_i4;TRINITY_DN332_c0_g2_i5;TRINITY_DN332_c0_g2_i6;TRINITY_DN332_c0_g2_i7;TRINITY_DN332_c0_g2_i8;TRINITY_DN332_c0_g2_i9	PREDICTED: ubiquitin thioesterase trabid-like [Apis dorsata]	trbd	Ubiquitin thioesterase trabid OS=Drosophila melanogaster GN=trbd PE=1 SV=1	GO:0004843(thiol-dependent ubiquitin-specific protease activity);GO:0005515(protein binding);GO:0005634(nucleus);GO:0005737(cytoplasm);GO:0007010(cytoskeleton organization);GO:0016477(cell migration);GO:0016579(protein deubiquitination);GO:0030177(positive regulation of Wnt signaling pathway);GO:0035523(protein K29-linked deubiquitination);GO:0036459(thiol-dependent ubiquitinyl hydrolase activity…	ENOG410XS64(zinc finger, RAN-binding domain containing 1)	NA	NA	NA	-	E9J592.1 PF02338.17;OTU;	-	2558.15	2280.32	2001.26	3512.72	4418.62	3976.84	33.01	27.75	26.74	51.95	70.59	70.33	29.17	64.29	-1.0961	down	6.81849e-05	0.0118417	yes
TRINITY_DN449_c0_g2	3444	TRINITY_DN449_c0_g2_i1;TRINITY_DN449_c0_g2_i2;TRINITY_DN449_c0_g2_i3;TRINITY_DN449_c0_g2_i4	PREDICTED: WAS/WASL-interacting protein family member 1-like isoform X1 [Habropoda laboriosa]	-	-	GO:0008150(biological_process);GO:0016020(membrane);GO:0016021(integral component of membrane)	ENOG41126PF(low density lipoprotein receptor class A domain containing 4)	-	-	-	-	-	-	1176.6	1390.67	1389.83	1855.92	2646.88	2856.41	26.47	28.6	31.15	46.45	71.51	84.71	28.74	67.56	-1.19291	down	7.41183e-05	0.0126778	yes
TRINITY_DN809_c0_g1	12195	TRINITY_DN809_c0_g1_i1;TRINITY_DN809_c0_g1_i10;TRINITY_DN809_c0_g1_i11;TRINITY_DN809_c0_g1_i12;TRINITY_DN809_c0_g1_i13;TRINITY_DN809_c0_g1_i14;TRINITY_DN809_c0_g1_i15;TRINITY_DN809_c0_g1_i16;TRINITY_DN809_c0_g1_i17;TRINITY_DN809_c0_g1_i18;TRINITY_DN809_c0_g1_i19;TRINITY_DN809_c0_g1_i2;TRINITY_DN809_c0_g1_i20;TRINITY_DN809_c0_g1_i21;TRINITY_DN809_c0_g1_i22;TRINITY_DN809_c0_g1_i23;TRINITY_DN809_c0_…	PREDICTED: voltage-dependent calcium channel type A subunit alpha-1 isoform X7 [Megachile rotundata]	CAC	Voltage-dependent calcium channel type A subunit alpha-1 OS=Apis mellifera GN=CAC PE=2 SV=1	GO:0005886(plasma membrane);GO:0008331(high voltage-gated calcium channel activity);GO:0086010(membrane depolarization during action potential)	COG1226(PotAssium voltage-gated channel)	NA	NA	NA	-	C9D7C2.1 PF00520.29;Ion_trans;	-	1712.93	1366.14	1737.75	2268.33	3170.09	3760.01	13.89	10.31	14.28	19.08	31.72	43.86	12.83	31.55	-1.23209	down	7.45525e-05	0.0126778	yes
TRINITY_DN954_c0_g2	9929	TRINITY_DN954_c0_g2_i1;TRINITY_DN954_c0_g2_i2	uncharacterized protein LOC100643209 [Bombus terrestris]	stnB	Protein stoned-B OS=Drosophila melanogaster GN=stnB PE=1 SV=4	GO:0005515(protein binding);GO:0005886(plasma membrane);GO:0007268(chemical synaptic transmission);GO:0008021(synaptic vesicle);GO:0016021(integral component of membrane);GO:0030139(endocytic vesicle);GO:0048488(synaptic vesicle endocytosis);GO:0048489(synaptic vesicle transport);GO:0048786(presynaptic active zone);GO:0048788(cytoskeleton of presynaptic active zone);GO:0097110(scaffold protein bi…	ENOG410XQHF(stonin 2)	NA	NA	NA	-	K7J344.1 PF00928.19;Adap_comp_sub;	-	662.75	446.83	562.21	784.42	1452.95	1356.72	4.35	2.73	3.81	5.99	12.25	12.54	3.63	10.26	-1.39809	down	7.80234e-05	0.0130106	yes
TRINITY_DN428_c1_g3	1469	TRINITY_DN428_c1_g3_i1	3-phosphoinositide-dependent protein kinase 1 isoform X2 [Bombus terrestris]	Pdk1	3-phosphoinositide-dependent protein kinase 1 OS=Drosophila melanogaster GN=Pdk1 PE=1 SV=4	GO:0004674(protein serine/threonine kinase activity);GO:0005622(intracellular);GO:0018105(peptidyl-serine phosphorylation);GO:0035556(intracellular signal transduction)	ENOG410XRT8(3phosphoinositidedependent protein kinase)	K06276	3-phosphoinositide dependent protein kinase-1	EC:2.7.11.1	bim04068(FoxO signaling pathway);bim04150(mTOR signaling pathway);bim04140(Autophagy - animal)	A0A087ZVX1.1 PF00069.23;Pkinase;	-	422.37	242.3	405.77	609.56	862.79	1286.86	25.71	13.44	25	42.99	62.23	100.67	21.38	68.63	-1.67025	down	7.81033e-05	0.0130106	yes
TRINITY_DN9093_c1_g1	795	TRINITY_DN9093_c1_g1_i1;TRINITY_DN9093_c1_g1_i2;TRINITY_DN9093_c1_g1_i3	COLlagen [Caenorhabditis elegans]	col-40	Cuticle collagen 40 OS=Caenorhabditis elegans GN=col-40 PE=3 SV=3	GO:0005581(collagen trimer);GO:0016020(membrane);GO:0016021(integral component of membrane);GO:0042302(structural constituent of cuticle)	ENOG410XNMM(collagen, type)	K10599	pre-mRNA-processing factor 19	EC:2.3.2.27	tsp03040(Spliceosome);tsp04120(Ubiquitin mediated proteolysis)	A0A0N4W7W3.1 PF01484.15;Col_cuticle_N;	-	46	46	42	0	0	0	8.15	7.16	7.26	0	0	0	7.52	0	8.34559	up	8.25243e-05	0.0136082	yes
TRINITY_DN2037_c0_g1	4777	TRINITY_DN2037_c0_g1_i1;TRINITY_DN2037_c0_g1_i10;TRINITY_DN2037_c0_g1_i11;TRINITY_DN2037_c0_g1_i12;TRINITY_DN2037_c0_g1_i13;TRINITY_DN2037_c0_g1_i14;TRINITY_DN2037_c0_g1_i15;TRINITY_DN2037_c0_g1_i16;TRINITY_DN2037_c0_g1_i17;TRINITY_DN2037_c0_g1_i18;TRINITY_DN2037_c0_g1_i19;TRINITY_DN2037_c0_g1_i2;TRINITY_DN2037_c0_g1_i20;TRINITY_DN2037_c0_g1_i21;TRINITY_DN2037_c0_g1_i22;TRINITY_DN2037_c0_g1_i23;T…	PREDICTED: phosphoenolpyruvate carboxykinase [GTP]-like isoform X1 [Megachile rotundata]	Pepck	Phosphoenolpyruvate carboxykinase [GTP] OS=Drosophila melanogaster GN=Pepck PE=2 SV=2	GO:0004613(phosphoenolpyruvate carboxykinase (GTP) activity);GO:0005525(GTP binding);GO:0005739(mitochondrion);GO:0005829(cytosol);GO:0006090(pyruvate metabolic process);GO:0006094(gluconeogenesis);GO:0006807(nitrogen compound metabolic process);GO:0019543(propionate catabolic process);GO:0030145(manganese ion binding);GO:0033993(response to lipid);GO:0042594(response to starvation);GO:0046327(gl…	COG1274(Catalyzes the conversion of oxaloacetate (OAA) to phosphoenolpyruvate (PEP), the rate-limiting step in the metabolic pathway that produces glucose from lactate and other precursors derived from the citric acid cycle (By similarity))	K01596	phosphoenolpyruvate carboxykinase (GTP)	EC:4.1.1.32	bter00010(Glycolysis / Gluconeogenesis);bter00020(Citrate cycle (TCA cycle));bter00620(Pyruvate metabolism);bter04068(FoxO signaling pathway)	A0A088AIZ2.1 PF00821.16;PEPCK;	-	19817	15962.3	17599	24409.8	33981.8	43456.6	453.68	336.66	413.44	646.49	979.91	1369.24	401.26	998.55	-1.23554	down	8.76464e-05	0.0143083	yes
TRINITY_DN5509_c0_g1	5287	TRINITY_DN5509_c0_g1_i1;TRINITY_DN5509_c0_g1_i10;TRINITY_DN5509_c0_g1_i11;TRINITY_DN5509_c0_g1_i12;TRINITY_DN5509_c0_g1_i2;TRINITY_DN5509_c0_g1_i3;TRINITY_DN5509_c0_g1_i4;TRINITY_DN5509_c0_g1_i5;TRINITY_DN5509_c0_g1_i6;TRINITY_DN5509_c0_g1_i7;TRINITY_DN5509_c0_g1_i8;TRINITY_DN5509_c0_g1_i9	serine-rich adhesin for platelets isoform X1 [Bombus terrestris]	nhl-1	RING finger protein nhl-1 OS=Caenorhabditis elegans GN=nhl-1 PE=1 SV=2	GO:0004842(ubiquitin-protein transferase activity);GO:0006941(striated muscle contraction);GO:0008270(zinc ion binding);GO:0008345(larval locomotory behavior);GO:0016567(protein ubiquitination);GO:0030018(Z disc);GO:0030239(myofibril assembly);GO:0046716(muscle cell cellular homeostasis);GO:0046872(metal ion binding);GO:0048747(muscle fiber development)	ENOG410XSQC(nhl repeat containing protein)	NA	NA	NA	-	F4WIS7.1 PF13445.4;zf-RING_UBOX;	-	14112	9987.86	15843.8	19269.7	28016.7	30502.9	378.85	248.75	438.46	608.76	954.88	1132.49	355.35	898.71	-1.25536	down	9.38334e-05	0.0150194	yes
TRINITY_DN17329_c0_g1	385	TRINITY_DN17329_c0_g1_i1;TRINITY_DN17329_c0_g1_i2	hypothetical protein CAEBREN_14598 [Caenorhabditis brenneri]	col-10	Cuticle collagen 10 OS=Caenorhabditis briggsae GN=col-10 PE=3 SV=1	GO:0005198(structural molecule activity);GO:0005581(collagen trimer);GO:0042302(structural constituent of cuticle)	ENOG410XNMM(collagen, type)	-	-	-	-	E3NUB5.1 PF01484.15;Col_cuticle_N;	-	40.52	38.69	50.21	0	0	0	27.95	26.08	35.12	0	0	0	29.72	0	8.30717	up	9.38427e-05	0.0150194	yes
TRINITY_DN9478_c1_g1	540	TRINITY_DN9478_c1_g1_i1;TRINITY_DN9478_c1_g1_i2;TRINITY_DN9478_c1_g1_i3;TRINITY_DN9478_c1_g1_i4	-	-	-	-	-	-	-	-	-	-	-	443.25	287.06	426.38	406.01	1315.3	1769.99	362.8	224.5	365.67	410.89	1308.18	1963.46	317.66	1227.51	-1.89933	down	9.58954e-05	0.015199	yes
TRINITY_DN2279_c2_g1	2782	TRINITY_DN2279_c2_g1_i1	PREDICTED: plasminogen activator inhibitor 1 isoform X1 [Chlorocebus sabaeus]	SERPINE1	Plasminogen activator inhibitor 1 OS=Homo sapiens GN=SERPINE1 PE=1 SV=1	GO:0001300(chronological cell aging);GO:0001525(angiogenesis);GO:0002020(protease binding);GO:0002576(platelet degranulation);GO:0004867(serine-type endopeptidase inhibitor activity);GO:0005102(receptor binding);GO:0005515(protein binding);GO:0005576(extracellular region);GO:0005615(extracellular space);GO:0005886(plasma membrane);GO:0007623(circadian rhythm);GO:0010469(regulation of receptor act…	COG4826(serine-type endopeptidase inhibitor activity)	K03982	plasminogen activator inhibitor 1	-	csab04390(Hippo signaling pathway);csab04371(Apelin signaling pathway);csab04066(HIF-1 signaling pathway);csab04115(p53 signaling pathway);csab04218(Cellular senescence);csab04610(Complement and coagulation cascades);csab04933(AGE-RAGE signaling pathway in diabetic complications);csab05142(Chagas disease (American trypanosomiasis))	G7P138.1 PF00079.18;Serpin;	-	817.88	867.26	7	12	0	0	21.79	21.32	0.19	0.37	0	0	14.43	0.12	6.79189	up	0.000103595	0.0162615	yes
TRINITY_DN25421_c0_g1	1353	TRINITY_DN25421_c0_g1_i1	creatine kinase S-type [Cricetulus griseus]	Ckmt2	Creatine kinase S-type, mitochondrial OS=Mus musculus GN=Ckmt2 PE=1 SV=1	GO:0000166(nucleotide binding);GO:0003824(catalytic activity);GO:0004111(creatine kinase activity);GO:0005524(ATP binding);GO:0005739(mitochondrion);GO:0005743(mitochondrial inner membrane);GO:0006603(phosphocreatine metabolic process);GO:0016020(membrane);GO:0016301(kinase activity);GO:0016310(phosphorylation);GO:0016740(transferase activity);GO:0016772(transferase activity, transferring phospho…	COG3869(ATP guanido phosphotransferase)	K00933	creatine kinase	EC:2.7.3.2	mmu00330(Arginine and proline metabolism)	M3YA62.1 PF00217.17;ATP-gua_Ptrans;	-	119	47	52	1	0	0	8.17	2.93	3.6	0.08	0	0	4.9	0.03	7.05805	up	0.000105499	0.0164026	yes
TRINITY_DN1222_c0_g3	4285	TRINITY_DN1222_c0_g3_i1;TRINITY_DN1222_c0_g3_i2;TRINITY_DN1222_c0_g3_i3;TRINITY_DN1222_c0_g3_i4;TRINITY_DN1222_c0_g3_i5;TRINITY_DN1222_c0_g3_i6	PREDICTED: dual specificity protein phosphatase 10 isoform X1 [Megachile rotundata]	DUSP10	Dual specificity protein phosphatase 10 OS=Homo sapiens GN=DUSP10 PE=1 SV=1	GO:0043508(negative regulation of JUN kinase activity)	COG2453(dual specificity phosphatase)	K20216	dual specificity phosphatase 10	EC:3.1.3.16 3.1.3.48	bter04013(MAPK signaling pathway - fly);bter04214(Apoptosis - fly)	F4WQE5.1 PF00782.18;DSPc;	-	1700.77	1483.57	1974.49	2691.47	3053.72	3510.7	37.68	31.28	45.94	71.71	90.35	109.18	38.3	90.41	-1.13898	down	0.000109666	0.0168896	yes
TRINITY_DN2301_c0_g1	4175	TRINITY_DN2301_c0_g1_i1;TRINITY_DN2301_c0_g1_i10;TRINITY_DN2301_c0_g1_i11;TRINITY_DN2301_c0_g1_i12;TRINITY_DN2301_c0_g1_i13;TRINITY_DN2301_c0_g1_i14;TRINITY_DN2301_c0_g1_i15;TRINITY_DN2301_c0_g1_i16;TRINITY_DN2301_c0_g1_i17;TRINITY_DN2301_c0_g1_i18;TRINITY_DN2301_c0_g1_i19;TRINITY_DN2301_c0_g1_i2;TRINITY_DN2301_c0_g1_i20;TRINITY_DN2301_c0_g1_i21;TRINITY_DN2301_c0_g1_i22;TRINITY_DN2301_c0_g1_i23;T…	PREDICTED: uncharacterized protein LOC100879168 [Megachile rotundata]	-	-	-	ENOG41100A7(EGF_like)	-	-	-	-	-	-	609.8	706.21	547.73	1080.04	1308.17	1085.01	18.54	19.27	14.84	31.15	39.82	37.44	17.55	36.14	-1.19207	down	0.000112378	0.0171253	yes
TRINITY_DN17150_c0_g2	4568	TRINITY_DN17150_c0_g2_i1;TRINITY_DN17150_c0_g2_i2	-	-	-	-	-	-	-	-	-	-	-	626.98	543.75	718.38	952.64	1299.35	1483.49	9.47	7.61	11.16	16.68	24.85	31.05	9.41	24.19	-1.27995	down	0.000113294	0.0171253	yes
TRINITY_DN896_c0_g1	8792	TRINITY_DN896_c0_g1_i1;TRINITY_DN896_c0_g1_i10;TRINITY_DN896_c0_g1_i11;TRINITY_DN896_c0_g1_i12;TRINITY_DN896_c0_g1_i13;TRINITY_DN896_c0_g1_i14;TRINITY_DN896_c0_g1_i15;TRINITY_DN896_c0_g1_i16;TRINITY_DN896_c0_g1_i17;TRINITY_DN896_c0_g1_i18;TRINITY_DN896_c0_g1_i19;TRINITY_DN896_c0_g1_i2;TRINITY_DN896_c0_g1_i20;TRINITY_DN896_c0_g1_i21;TRINITY_DN896_c0_g1_i22;TRINITY_DN896_c0_g1_i23;TRINITY_DN896_c0_…	2-oxoglutarate dehydrogenase, mitochondrial isoform X4 [Ceratina calcarata]	OGDH	2-oxoglutarate dehydrogenase, mitochondrial OS=Macaca fascicularis GN=OGDH PE=2 SV=1	GO:0004591(oxoglutarate dehydrogenase (succinyl-transferring) activity);GO:0005739(mitochondrion);GO:0005829(cytosol);GO:0006099(tricarboxylic acid cycle);GO:0045252(oxoglutarate dehydrogenase complex)	COG0567(2-oxoglutarate dehydrogenase, E1)	K00164	2-oxoglutarate dehydrogenase E1 component	EC:1.2.4.2	ame00020(Citrate cycle (TCA cycle));ame00310(Lysine degradation);ame00380(Tryptophan metabolism)	W4WX23.1 PF00676.18;E1_dh;	-	18958.8	16016.6	15935.3	29255.3	31422.7	25989	302.34	250.1	270.09	579.72	702.11	663.4	274.18	648.41	-1.05908	down	0.000116038	0.0171668	yes
TRINITY_DN617_c0_g2	1177	TRINITY_DN617_c0_g2_i1	-	-	-	-	-	-	-	-	-	-	-	576.46	468.38	634.45	816.33	1302.7	1266.17	49.11	36.05	54.26	80.54	127.19	133.51	46.47	113.75	-1.30484	down	0.00011702	0.0171668	yes
TRINITY_DN2332_c0_g2	3566	TRINITY_DN2332_c0_g2_i1;TRINITY_DN2332_c0_g2_i2;TRINITY_DN2332_c0_g2_i3;TRINITY_DN2332_c0_g2_i4;TRINITY_DN2332_c0_g2_i5	PREDICTED: spondin-1 [Megachile rotundata]	Spon1	Spondin-1 OS=Rattus norvegicus GN=Spon1 PE=1 SV=1	GO:0004867(serine-type endopeptidase inhibitor activity);GO:0005576(extracellular region)	ENOG410XQHP(Extracellular matrix protein)	NA	NA	NA	-	A0A088AUJ4.1 PF06468.11;Spond_N;	-	5062.19	5656.74	4400.98	6289.41	9520.96	14472.3	137.77	142.72	122.16	199.26	324.3	539.96	134.22	354.51	-1.315	down	0.000117429	0.0171668	yes
TRINITY_DN6158_c1_g1	6829	TRINITY_DN6158_c1_g1_i1;TRINITY_DN6158_c1_g1_i2	PREDICTED: uncharacterized protein LOC100878620 [Megachile rotundata]	TESK2	Dual specificity testis-specific protein kinase 2 OS=Homo sapiens GN=TESK2 PE=1 SV=1	GO:0001700(embryonic development via the syncytial blastoderm);GO:0004672(protein kinase activity);GO:0004674(protein serine/threonine kinase activity);GO:0005524(ATP binding);GO:0005737(cytoplasm);GO:0006468(protein phosphorylation);GO:0007015(actin filament organization);GO:0010906(regulation of glucose metabolic process);GO:0045177(apical part of cell);GO:0045873(negative regulation of sevenle…	COG0515(Serine Threonine protein kinase)	NA	NA	NA	-	K7J8V4.1 PF07714.15;Pkinase_Tyr;	-	687.01	630.19	762.1	854.77	1579.96	2033.99	6.83	5.81	7.79	9.84	20.04	28.25	6.81	19.38	-1.40669	down	0.000117795	0.0171668	yes
TRINITY_DN281_c0_g1	6328	TRINITY_DN281_c0_g1_i1;TRINITY_DN281_c0_g1_i2;TRINITY_DN281_c0_g1_i3;TRINITY_DN281_c0_g1_i4;TRINITY_DN281_c0_g1_i6;TRINITY_DN281_c0_g1_i7	PREDICTED: protein FAM160B2-like [Megachile rotundata]	Hex-t2	Hexokinase type 2 OS=Drosophila melanogaster GN=Hex-t2 PE=2 SV=4	GO:0001678(cellular glucose homeostasis);GO:0004340(glucokinase activity);GO:0004396(hexokinase activity);GO:0005524(ATP binding);GO:0005536(glucose binding);GO:0005829(cytosol);GO:0006096(glycolytic process);GO:0008865(fructokinase activity);GO:0019158(mannokinase activity);GO:0046835(carbohydrate phosphorylation);GO:0060361(flight)	ENOG410XTDG(Family with sequence similarity 160, member)	K00844	hexokinase	EC:2.7.1.1	bter00010(Glycolysis / Gluconeogenesis);bter00051(Fructose and mannose metabolism);bter00052(Galactose metabolism);bter00500(Starch and sucrose metabolism);bter00520(Amino sugar and nucleotide sugar metabolism);bter00524(Neomycin, kanamycin and gentamicin biosynthesis)	A0A088A6W9.1 PF10257.7;RAI16-like;	-	9062.74	8459.79	7055.45	12307.7	14831	14668.6	164.9	141.1	132.17	255.06	333.97	363.75	146.06	317.59	-1.06532	down	0.000119636	0.0171668	yes
TRINITY_DN240_c0_g1	6917	TRINITY_DN240_c0_g1_i1;TRINITY_DN240_c0_g1_i10;TRINITY_DN240_c0_g1_i11;TRINITY_DN240_c0_g1_i12;TRINITY_DN240_c0_g1_i13;TRINITY_DN240_c0_g1_i14;TRINITY_DN240_c0_g1_i15;TRINITY_DN240_c0_g1_i2;TRINITY_DN240_c0_g1_i3;TRINITY_DN240_c0_g1_i4;TRINITY_DN240_c0_g1_i5;TRINITY_DN240_c0_g1_i6;TRINITY_DN240_c0_g1_i7;TRINITY_DN240_c0_g1_i8;TRINITY_DN240_c0_g1_i9	PREDICTED: multidrug resistance protein homolog 49 isoform X2 [Megachile rotundata]	Mdr49	Multidrug resistance protein homolog 49 OS=Drosophila melanogaster GN=Mdr49 PE=2 SV=2	GO:0016021(integral component of membrane);GO:0042626(ATPase activity, coupled to transmembrane movement of substances);GO:0055085(transmembrane transport)	COG1132((ABC) transporter)	K05658	ATP-binding cassette, subfamily B (MDR/TAP), member 1	EC:3.6.3.44	ame02010(ABC transporters)	A0A088AUI4.1 PF00664.21;ABC_membrane;	-	14965.1	11534.4	14679.3	17896.7	26881.8	37203.8	160.38	113.25	160.94	222.89	373.31	565.38	144.86	387.19	-1.29762	down	0.000119879	0.0171668	yes
TRINITY_DN1468_c1_g1	8107	TRINITY_DN1468_c1_g1_i1;TRINITY_DN1468_c1_g1_i2	PREDICTED: E3 ubiquitin-protein ligase HUWE1 [Megachile rotundata]	HUWE1	E3 ubiquitin-protein ligase HUWE1 OS=Homo sapiens GN=HUWE1 PE=1 SV=3	GO:0004842(ubiquitin-protein transferase activity);GO:0005634(nucleus);GO:0005737(cytoplasm)	COG5021(ubiquitin protein ligase)	K10592	E3 ubiquitin-protein ligase HUWE1	EC:2.3.2.26	ame04120(Ubiquitin mediated proteolysis)	E9I8G5.1 PF06025.10;DUF913;	-	1650.99	1116.35	1730.51	1767.63	3628.05	4559.85	13.42	8.43	14.51	16.67	37.74	51.98	12.12	35.46	-1.44652	down	0.000127441	0.0180911	yes
TRINITY_DN1435_c0_g1	6031	TRINITY_DN1435_c0_g1_i1;TRINITY_DN1435_c0_g1_i2;TRINITY_DN1435_c0_g1_i3;TRINITY_DN1435_c0_g1_i4;TRINITY_DN1435_c0_g1_i5;TRINITY_DN1435_c0_g1_i7;TRINITY_DN1435_c0_g1_i8	PREDICTED: diuretic hormone receptor-like isoform X1 [Megachile rotundata]	-	Diuretic hormone receptor OS=Acheta domesticus PE=2 SV=1	GO:0004930(G-protein coupled receptor activity);GO:0004948(calcitonin receptor activity);GO:0005887(integral component of plasma membrane);GO:0007166(cell surface receptor signaling pathway);GO:0007186(G-protein coupled receptor signaling pathway);GO:0008036(diuretic hormone receptor activity);GO:0008188(neuropeptide receptor activity);GO:0009755(hormone-mediated signaling pathway);GO:0016021(int…	ENOG410XRS2(Receptor)	K04578	corticotropin releasing hormone receptor 1	-	ame04080(Neuroactive ligand-receptor interaction)	A0A088ACK0.1 PF00002.22;7tm_2;	-	523.53	397.01	427.48	704.38	995.75	1066.62	8.13	5.92	7.64	12.11	17.74	22.94	7.23	17.6	-1.3362	down	0.000132355	0.0184055	yes
TRINITY_DN13716_c0_g1	1296	TRINITY_DN13716_c0_g1_i1	elongation factor 1-alpha 1-like protein [Euroglyphus maynei]	-	Elongation factor 1-alpha OS=Bombyx mori PE=2 SV=1	GO:0003746(translation elongation factor activity);GO:0003924(GTPase activity);GO:0005622(intracellular)	COG5256(This protein promotes the GTP-dependent binding of aminoacyl-tRNA to the A-site of ribosomes during protein biosynthesis (By similarity))	K03231	elongation factor 1-alpha	-	isc03013(RNA transport)	L5K105.1 PF00009.25;GTP_EFTU;	-	37.02	77	23	0	0	0	2.71	5.12	1.7	0	0	0	3.18	0	8.36418	up	0.00013275	0.0184055	yes
TRINITY_DN388_c1_g4	3091	TRINITY_DN388_c1_g4_i1	ecdysone-inducible protein E75 isoform X4 [Pogonomyrmex barbatus]	E75	Ecdysone-inducible protein E75 OS=Choristoneura fumiferana GN=E75 PE=2 SV=1	GO:0000122(negative regulation of transcription by RNA polymerase II);GO:0000976(transcription regulatory region sequence-specific DNA binding);GO:0000977(RNA polymerase II regulatory region sequence-specific DNA binding);GO:0003677(DNA binding);GO:0003700(DNA binding transcription factor activity);GO:0003707(steroid hormone receptor activity);GO:0004879(nuclear receptor activity);GO:0005634(nucl…	ENOG410XT74(receptor)	NA	NA	NA	-	E2BWY1.1 PF00104.28;Hormone_recep;	THR-like	616.65	525.97	769.37	872.27	1410.37	1805.69	14.51	11.43	18.57	23.8	41.5	58.05	14.84	41.12	-1.3954	down	0.000133038	0.0184055	yes
TRINITY_DN285_c0_g1	10831	TRINITY_DN285_c0_g1_i1;TRINITY_DN285_c0_g1_i10;TRINITY_DN285_c0_g1_i101;TRINITY_DN285_c0_g1_i102;TRINITY_DN285_c0_g1_i103;TRINITY_DN285_c0_g1_i104;TRINITY_DN285_c0_g1_i105;TRINITY_DN285_c0_g1_i106;TRINITY_DN285_c0_g1_i107;TRINITY_DN285_c0_g1_i108;TRINITY_DN285_c0_g1_i109;TRINITY_DN285_c0_g1_i11;TRINITY_DN285_c0_g1_i12;TRINITY_DN285_c0_g1_i13;TRINITY_DN285_c0_g1_i14;TRINITY_DN285_c0_g1_i15;TRINITY…	PREDICTED: uncharacterized protein LOC100877112 isoform X1 [Megachile rotundata]	CG43427	Uncharacterized protein CG43427 OS=Drosophila melanogaster GN=CG43427 PE=2 SV=1	GO:0019904(protein domain specific binding);GO:0031430(M band);GO:0046872(metal ion binding)	ENOG410YWPP(NA)	NA	NA	NA	-	E9I9A5.1 PF15949.3;DUF4757;	-	9392.75	8651.03	8646.94	11316.4	16724	22514.2	130.81	111.83	125.97	184.76	309.86	478.03	122.87	324.22	-1.22761	down	0.000134167	0.0184057	yes
TRINITY_DN232_c0_g1	6773	TRINITY_DN232_c0_g1_i1;TRINITY_DN232_c0_g1_i10;TRINITY_DN232_c0_g1_i11;TRINITY_DN232_c0_g1_i2;TRINITY_DN232_c0_g1_i3;TRINITY_DN232_c0_g1_i4;TRINITY_DN232_c0_g1_i5;TRINITY_DN232_c0_g1_i6;TRINITY_DN232_c0_g1_i7;TRINITY_DN232_c0_g1_i8;TRINITY_DN232_c0_g1_i9	PREDICTED: calcium-transporting ATPase sarcoplasmic/endoplasmic reticulum type isoform X3 [Megachile rotundata]	Ca-P60A	Calcium-transporting ATPase sarcoplasmic/endoplasmic reticulum type OS=Drosophila melanogaster GN=Ca-P60A PE=1 SV=2	GO:0000166(nucleotide binding);GO:0005388(calcium-transporting ATPase activity);GO:0005515(protein binding);GO:0005783(endoplasmic reticulum);GO:0005789(endoplasmic reticulum membrane);GO:0006635(fatty acid beta-oxidation);GO:0006874(cellular calcium ion homeostasis);GO:0007274(neuromuscular synaptic transmission);GO:0007629(flight behavior);GO:0008553(proton-exporting ATPase activity, phosphoryl…	COG0474(P-type atpase)	K05853	Ca2+ transporting ATPase, sarcoplasmic/endoplasmic reticulum	EC:3.6.3.8	bmy04020(Calcium signaling pathway)	E2BNY3.1 PF00702.24;Hydrolase;	-	91825.9	59688.8	92596.6	111189	167871	201915	942.97	570.43	977.96	1319.79	2190.68	2891.34	830.45	2133.94	-1.27626	down	0.000135498	0.0184334	yes
TRINITY_DN3824_c0_g8	1327	TRINITY_DN3824_c0_g8_i1	-	-	-	-	-	-	-	-	-	-	-	379.71	320.17	394.43	528.9	905.92	1120.49	26.84	20.55	28.13	43.31	74.85	100.24	25.17	72.8	-1.52475	down	0.000136911	0.0184717	yes
TRINITY_DN6123_c0_g1	4272	TRINITY_DN6123_c0_g1_i1;TRINITY_DN6123_c0_g1_i2;TRINITY_DN6123_c0_g1_i3;TRINITY_DN6123_c0_g1_i4;TRINITY_DN6123_c0_g1_i5	PREDICTED: alpha,alpha-trehalose-phosphate synthase [UDP-forming] [Megachile rotundata]	TPS1	Alpha,alpha-trehalose-phosphate synthase [UDP-forming] OS=Candida albicans (strain SC5314 / ATCC MYA-2876) GN=TPS1 PE=2 SV=1	GO:0003825(alpha,alpha-trehalose-phosphate synthase (UDP-forming) activity);GO:0004805(trehalose-phosphatase activity);GO:0005737(cytoplasm);GO:0005946(alpha,alpha-trehalose-phosphate synthase complex (UDP-forming));GO:0005992(trehalose biosynthetic process);GO:0016791(phosphatase activity);GO:0045494(photoreceptor cell maintenance);GO:0070413(trehalose metabolism in response to stress)	COG0380(synthase);COG1877(trehalose biosynthetic process)	K16055	trehalose 6-phosphate synthase/phosphatase	EC:2.4.1.15 3.1.3.12	ame00500(Starch and sucrose metabolism)	E2ANA9.1 PF00982.19;Glyco_transf_20;	-	10923.6	9490.19	9467.3	13721.5	17460.6	22476.5	230.92	186.72	207.35	325.68	448.2	636.79	208.33	470.22	-1.14888	down	0.000141649	0.0189542	yes
TRINITY_DN799_c1_g2	968	TRINITY_DN799_c1_g2_i1	COLlagen [Caenorhabditis elegans]	col-12	Cuticle collagen 12 OS=Caenorhabditis elegans GN=col-12 PE=3 SV=1	GO:0005581(collagen trimer);GO:0016020(membrane);GO:0016021(integral component of membrane);GO:0042302(structural constituent of cuticle)	ENOG410XNMM(collagen, type)	-	-	-	-	K7GTK5.1 PF01484.15;Col_cuticle_N;	-	44	62.83	65.07	1	0	0	5.25	6.69	7.7	0.14	0	0	6.55	0.05	6.72231	up	0.000143784	0.0190835	yes
TRINITY_DN1048_c1_g1	4604	TRINITY_DN1048_c1_g1_i1;TRINITY_DN1048_c1_g1_i2;TRINITY_DN1048_c1_g1_i3	max dimerization protein 1 isoform X1 [Bombus terrestris]	Mxd1	Max dimerization protein 1 OS=Mus musculus GN=Mxd1 PE=1 SV=2	GO:0000122(negative regulation of transcription by RNA polymerase II);GO:0000790(nuclear chromatin);GO:0000978(RNA polymerase II proximal promoter sequence-specific DNA binding);GO:0003677(DNA binding);GO:0005515(protein binding);GO:0005634(nucleus);GO:0005654(nucleoplasm);GO:0005739(mitochondrion);GO:0005829(cytosol);GO:0006351(transcription, DNA-templated);GO:0006355(regulation of transcription…	ENOG4111X99(Max dimerization protein)	NA	NA	NA	-	K7INS8.1 PF00010.24;HLH;	bHLH	991.57	892.72	1014.26	1165.47	2171.67	2243.82	14.9	12.44	15.7	20.32	41.31	46.65	14.35	36.09	-1.24213	down	0.000164048	0.0215974	yes
TRINITY_DN25829_c0_g1	818	TRINITY_DN25829_c0_g1_i1	telethonin [Mus musculus]	Tcap	Telethonin OS=Mus musculus GN=Tcap PE=1 SV=1	GO:0001756(somitogenesis);GO:0003300(cardiac muscle hypertrophy);GO:0005515(protein binding);GO:0005737(cytoplasm);GO:0007512(adult heart development);GO:0008307(structural constituent of muscle);GO:0014898(cardiac muscle hypertrophy in response to stress);GO:0030018(Z disc);GO:0030240(skeletal muscle thin filament assembly);GO:0030241(skeletal muscle myosin thick filament assembly);GO:0030674(pr…	ENOG4111SDJ(Titin-cap)	NA	NA	NA	-	M3WCB9.1 PF09470.8;Telethonin;	-	58	28	26	0	0	0	9.67	4.11	4.24	0	0	0	6.01	0	8.08464	up	0.000166798	0.0216948	yes
TRINITY_DN89_c1_g3	3661	TRINITY_DN89_c1_g3_i1	-	-	-	-	-	-	-	-	-	-	-	1074.68	762.15	1042.98	1320.14	2125.31	1889.18	20.8	13.65	20.74	29.64	51.77	50.31	18.4	43.91	-1.17982	down	0.000167445	0.0216948	yes
TRINITY_DN26358_c0_g1	756	TRINITY_DN26358_c0_g1_i1	cytochrome c oxidase subunit III [Dermatophagoides pteronyssinus]	mt:CoIII	Cytochrome c oxidase subunit 3 OS=Aedes aegypti GN=mt:CoIII PE=3 SV=1	GO:0004129(cytochrome-c oxidase activity);GO:0005739(mitochondrion);GO:0005751(mitochondrial respiratory chain complex IV);GO:0006123(mitochondrial electron transport, cytochrome c to oxygen);GO:0009055(electron transfer activity);GO:0009060(aerobic respiration);GO:0015453(oxidoreduction-driven active transmembrane transporter activity);GO:0016020(membrane);GO:0019646(aerobic electron transport c…	COG1845(Cytochrome C Oxidase, Subunit III)	K02262	cytochrome c oxidase subunit 3	-	zne00190(Oxidative phosphorylation)	B0FWD1.1 PF00510.16;COX3;	-	25	120	19	0	0	0	4.95	20.81	3.65	0	0	0	9.8	0	8.61628	up	0.000173102	0.0218583	yes
TRINITY_DN11619_c0_g2	1128	TRINITY_DN11619_c0_g2_i1	Glutamate Receptor Level Decreased [Caenorhabditis elegans]	Rbm15b	Putative RNA-binding protein 15B OS=Mus musculus GN=Rbm15b PE=1 SV=2	GO:0000398(mRNA splicing, via spliceosome);GO:0003676(nucleic acid binding);GO:0003723(RNA binding);GO:0005634(nucleus)	ENOG410XSAC(modulation by virus of host morphology or physiology)	NA	NA	NA	-	H2KYB8.1 PF00076.20;RRM_1;	-	29	34.03	36.75	0	0	0	2.65	2.8	3.36	0	0	0	2.94	0	7.92834	up	0.00017311	0.0218583	yes
TRINITY_DN755_c0_g1	4480	TRINITY_DN755_c0_g1_i1;TRINITY_DN755_c0_g1_i2;TRINITY_DN755_c0_g1_i3;TRINITY_DN755_c0_g1_i4;TRINITY_DN755_c0_g1_i5;TRINITY_DN755_c0_g1_i6;TRINITY_DN755_c0_g1_i7;TRINITY_DN755_c0_g1_i8;TRINITY_DN755_c0_g1_i9	Putative protein disulfide-isomerase C1F5.02, partial [Eufriesea mexicana]	-	-	-	COG0526(Thioredoxin)	-	-	-	-	-	-	2419.36	1774.91	2743.06	3443.56	4418.13	4522.97	70.91	46.05	82.03	117.33	150.77	176.74	66.33	148.28	-1.12782	down	0.000175977	0.0218583	yes
TRINITY_DN9494_c0_g1	5780	TRINITY_DN9494_c0_g1_i1;TRINITY_DN9494_c0_g1_i2;TRINITY_DN9494_c0_g1_i3;TRINITY_DN9494_c0_g1_i4;TRINITY_DN9494_c0_g1_i5;TRINITY_DN9494_c0_g1_i6;TRINITY_DN9494_c0_g1_i7;TRINITY_DN9494_c0_g1_i8	PREDICTED: hypoxia-inducible factor 1-alpha-like isoform X1 [Megachile rotundata]	Npas2	Neuronal PAS domain-containing protein 2 OS=Mus musculus GN=Npas2 PE=1 SV=1	GO:0003700(DNA binding transcription factor activity);GO:0005500(juvenile hormone binding);GO:0005634(nucleus);GO:0005667(transcription factor complex);GO:0005737(cytoplasm);GO:0006355(regulation of transcription, DNA-templated);GO:0008134(transcription factor binding);GO:0010906(regulation of glucose metabolic process);GO:0035626(juvenile hormone mediated signaling pathway);GO:0043069(negative r…	ENOG4110EHH(PAS fold)	NA	NA	NA	-	E2AD09.1 PF14598.4;PAS_11;	bHLH	1398.72	926.63	1437.74	1768.43	2524.59	2810.28	19.33	14.23	20.1	27.62	41.4	53.9	17.89	40.97	-1.21124	down	0.000176273	0.0218583	yes
TRINITY_DN16363_c0_g1	3068	TRINITY_DN16363_c0_g1_i1;TRINITY_DN16363_c0_g1_i2;TRINITY_DN16363_c0_g1_i3	PREDICTED: protein vestigial [Megachile rotundata]	vg	Protein vestigial OS=Drosophila melanogaster GN=vg PE=1 SV=1	GO:0001745(compound eye morphogenesis);GO:0005515(protein binding);GO:0005634(nucleus);GO:0007346(regulation of mitotic cell cycle);GO:0007451(dorsal/ventral lineage restriction, imaginal disc);GO:0007472(wing disc morphogenesis);GO:0007473(wing disc proximal/distal pattern formation);GO:0007476(imaginal disc-derived wing morphogenesis);GO:0007480(imaginal disc-derived leg morphogenesis);GO:00074…	ENOG410Y23M(vestigial like 2 (Drosophila))	-	-	-	-	W4W0K1.1 PF07545.12;Vg_Tdu;	-	273	244.03	161.04	521.31	585	712.72	6.85	6.14	4.14	15.95	18.45	24.66	5.71	19.69	-1.73072	down	0.000177692	0.0218583	yes
TRINITY_DN16905_c0_g1	10313	TRINITY_DN16905_c0_g1_i1;TRINITY_DN16905_c0_g1_i2;TRINITY_DN16905_c0_g1_i3	PREDICTED: fibrillin-2-like isoform X1 [Megachile rotundata]	FBN3	Fibrillin-3 OS=Homo sapiens GN=FBN3 PE=2 SV=3	GO:0005201(extracellular matrix structural constituent);GO:0009653(anatomical structure morphogenesis);GO:0031012(extracellular matrix);GO:0090287(regulation of cellular response to growth factor stimulus)	ENOG410XSTY(Latent transforming growth factor beta binding protein 2)	NA	NA	NA	-	E2B1E5.1 PF00683.15;TB;	-	1658.86	1877.8	1762.05	2259.18	3327	4162.49	10.87	11.34	11.88	17.01	27.46	38.11	11.36	27.53	-1.1833	down	0.000179121	0.0218583	yes
TRINITY_DN123_c0_g1	4278	TRINITY_DN123_c0_g1_i1	PREDICTED: transcription factor SOX-4 [Megachile rotundata]	Sox14	Putative transcription factor SOX-14 OS=Drosophila melanogaster GN=Sox14 PE=2 SV=3	GO:0005634(nucleus);GO:0006357(regulation of transcription by RNA polymerase II);GO:0007552(metamorphosis);GO:0008301(DNA binding, bending);GO:0016322(neuron remodeling);GO:0043565(sequence-specific DNA binding);GO:0048813(dendrite morphogenesis);GO:1904799(regulation of neuron remodeling)	ENOG4111PMB(SRY (Sex determining region Y)-box)	NA	NA	NA	-	K7IR60.1 PF00505.17;HMG_box;	HMG	942.96	1383.5	1311.65	1708.11	2347.99	2704.24	15.31	20.81	21.9	32.17	48.2	60.74	19.34	47.04	-1.19336	down	0.000179633	0.0218583	yes
TRINITY_DN1904_c0_g5	1613	TRINITY_DN1904_c0_g5_i1	cytochrome c oxidase subunit III (mitochondrion) [Mus musculus]	mt-Co3	Cytochrome c oxidase subunit 3 OS=Mus musculus GN=mt-Co3 PE=1 SV=2	GO:0004129(cytochrome-c oxidase activity);GO:0005739(mitochondrion);GO:0005743(mitochondrial inner membrane);GO:0005751(mitochondrial respiratory chain complex IV);GO:0006123(mitochondrial electron transport, cytochrome c to oxygen);GO:0008535(respiratory chain complex IV assembly);GO:0009055(electron transfer activity);GO:0009060(aerobic respiration);GO:0015002(heme-copper terminal oxidase activ…	COG1845(Cytochrome C Oxidase, Subunit III)	K02262	cytochrome c oxidase subunit 3	-	mmu00190(Oxidative phosphorylation);mmu04260(Cardiac muscle contraction);mmu04714(Thermogenesis);mmu05010(Alzheimer disease);mmu05012(Parkinson disease);mmu05016(Huntington disease);mmu04932(Non-alcoholic fatty liver disease (NAFLD))	Q7H115.1 PF00510.16;COX3;	-	7970.54	3253.36	2988.78	529.6	12	5	425.2	158.59	161.84	32.74	0.77	0.35	248.54	11.29	4.41204	up	0.000179944	0.0218583	yes
TRINITY_DN5907_c0_g1	6635	TRINITY_DN5907_c0_g1_i1;TRINITY_DN5907_c0_g1_i10;TRINITY_DN5907_c0_g1_i11;TRINITY_DN5907_c0_g1_i12;TRINITY_DN5907_c0_g1_i13;TRINITY_DN5907_c0_g1_i14;TRINITY_DN5907_c0_g1_i2;TRINITY_DN5907_c0_g1_i5;TRINITY_DN5907_c0_g1_i6;TRINITY_DN5907_c0_g1_i7;TRINITY_DN5907_c0_g1_i8;TRINITY_DN5907_c0_g1_i9	PREDICTED: peroxidasin homolog [Megachile rotundata]	Pxn	Peroxidasin OS=Drosophila melanogaster GN=Pxn PE=1 SV=1	GO:0004601(peroxidase activity);GO:0005615(extracellular space);GO:0006909(phagocytosis);GO:0006979(response to oxidative stress);GO:0020037(heme binding);GO:0030198(extracellular matrix organization);GO:0055114(oxidation-reduction process)	ENOG410XPZ3(prostaglandin G H synthase and cyclooxygenase)	NA	NA	NA	-	A0A088A0S4.1 PF03098.13;An_peroxidase;	-	4189.44	3872.57	4069.71	4831.88	7357.85	12217.8	50.59	47.05	52.17	69.84	115.54	201.48	49.94	128.95	-1.32038	down	0.000180928	0.0218583	yes
TRINITY_DN3844_c0_g1	6483	TRINITY_DN3844_c0_g1_i1;TRINITY_DN3844_c0_g1_i10;TRINITY_DN3844_c0_g1_i11;TRINITY_DN3844_c0_g1_i2;TRINITY_DN3844_c0_g1_i3;TRINITY_DN3844_c0_g1_i4;TRINITY_DN3844_c0_g1_i5;TRINITY_DN3844_c0_g1_i6;TRINITY_DN3844_c0_g1_i7;TRINITY_DN3844_c0_g1_i8;TRINITY_DN3844_c0_g1_i9	PREDICTED: glycine receptor subunit alpha-4 isoform X10 [Megachile rotundata]	glc-1	Glutamate-gated chloride channel alpha OS=Caenorhabditis elegans GN=glc-1 PE=1 SV=1	GO:0008068(extracellularly glutamate-gated chloride channel activity)	ENOG410XP43(Glycine receptor)	NA	NA	NA	-	K7J087.1 PF02931.21;Neur_chan_LBD;	-	719.02	484.08	702.45	1036.53	1306.8	1304.95	14.26	7.75	14.13	21.65	25.04	28.76	12.05	25.15	-1.23008	down	0.000182097	0.0218583	yes
TRINITY_DN12961_c0_g1	6278	TRINITY_DN12961_c0_g1_i1;TRINITY_DN12961_c0_g1_i2;TRINITY_DN12961_c0_g1_i3;TRINITY_DN12961_c0_g1_i4;TRINITY_DN12961_c0_g1_i5;TRINITY_DN12961_c0_g1_i6;TRINITY_DN12961_c0_g1_i7	PREDICTED: cysteine-rich motor neuron 1 protein isoform X1 [Megachile rotundata]	kcp	Kielin/chordin-like protein OS=Xenopus laevis GN=kcp PE=2 SV=1	-	ENOG410Z6K0(Cysteine rich transmembrane BMP regulator 1)	-	-	-	-	A0A0J7L0E7.1 PF00093.16;VWC;	-	3648.9	2744.93	3593.28	4338.88	5998.97	8558.49	42.63	32.47	42.67	58.51	86.22	132.52	39.26	92.42	-1.22422	down	0.000185758	0.0219804	yes
TRINITY_DN27684_c0_g1	1166	TRINITY_DN27684_c0_g1_i1	creatine kinase M-type [Mus musculus]	Ckm	Creatine kinase M-type OS=Mus musculus GN=Ckm PE=1 SV=1	GO:0000166(nucleotide binding);GO:0003824(catalytic activity);GO:0004111(creatine kinase activity);GO:0005524(ATP binding);GO:0005737(cytoplasm);GO:0006603(phosphocreatine metabolic process);GO:0016301(kinase activity);GO:0016310(phosphorylation);GO:0016740(transferase activity);GO:0016772(transferase activity, transferring phosphorus-containing groups);GO:0046314(phosphocreatine biosynthetic pro…	COG3869(ATP guanido phosphotransferase)	K00933	creatine kinase	EC:2.7.3.2	mmu00330(Arginine and proline metabolism)	A0A0G2JSP8.1 PF00217.17;ATP-gua_Ptrans;	-	109	56	43	0	1	1	9.43	4.37	3.73	0	0.1	0.11	5.84	0.07	6.17598	up	0.000185807	0.0219804	yes
TRINITY_DN19281_c1_g1	2118	TRINITY_DN19281_c1_g1_i1	-	-	-	-	-	-	-	-	-	-	-	928.06	638.44	778.26	1238.08	1346.55	1836.95	34.55	21.84	29.57	53.43	61.44	91.32	28.65	68.73	-1.2187	down	0.000193975	0.0227364	yes
TRINITY_DN2201_c0_g1	5778	TRINITY_DN2201_c0_g1_i1;TRINITY_DN2201_c0_g1_i2;TRINITY_DN2201_c0_g1_i3	PREDICTED: zinc finger protein 1 [Megachile rotundata]	zfh1	Zinc finger protein 1 OS=Drosophila melanogaster GN=zfh1 PE=1 SV=2	GO:0000122(negative regulation of transcription by RNA polymerase II);GO:0000977(RNA polymerase II regulatory region sequence-specific DNA binding);GO:0003677(DNA binding);GO:0005634(nucleus);GO:0007280(pole cell migration);GO:0007399(nervous system development);GO:0007498(mesoderm development);GO:0007507(heart development);GO:0007516(hemocyte development);GO:0008045(motor neuron axon guidance);G…	ENOG410ZFMZ(zinc finger E-box binding homeobox)	NA	NA	NA	-	K7J0J6.1 PF00046.27;Homeobox;	zf-C2H2	618.13	683.73	764.45	942.66	1414.97	1625.82	7.21	7.42	9.24	15.36	21.22	30.7	7.96	22.43	-1.24598	down	0.000197399	0.0227364	yes
TRINITY_DN26051_c0_g1	834	TRINITY_DN26051_c0_g1_i1	NADH dehydrogenase subunit 2 (mitochondrion) [Rhizoglyphus robini]	-	-	-	-	-	-	-	-	-	-	18	134	20	0	0	0	2.88	18.91	3.14	0	0	0	8.31	0	8.68386	up	0.000198605	0.0227364	yes
TRINITY_DN1044_c1_g2	5821	TRINITY_DN1044_c1_g2_i1;TRINITY_DN1044_c1_g2_i10;TRINITY_DN1044_c1_g2_i2;TRINITY_DN1044_c1_g2_i3;TRINITY_DN1044_c1_g2_i4;TRINITY_DN1044_c1_g2_i5;TRINITY_DN1044_c1_g2_i6;TRINITY_DN1044_c1_g2_i7;TRINITY_DN1044_c1_g2_i8;TRINITY_DN1044_c1_g2_i9	PREDICTED: MAP kinase-activating death domain protein isoform X7 [Apis florea]	Rab3-GEF	MAP kinase-activating death domain protein OS=Drosophila melanogaster GN=Rab3-GEF PE=2 SV=2	GO:0017112(Rab guanyl-nucleotide exchange factor activity)	ENOG410XP23(map-kinase activating death domain)	NA	NA	NA	-	E2BNE5.1 PF02141.19;DENN;	-	937.4	826.63	872.73	1217.42	1625.97	1837.99	13.11	10.98	12.84	18.97	26.24	32.22	12.31	25.81	-1.12755	down	0.000199959	0.0227364	yes
TRINITY_DN7100_c0_g3	2290	TRINITY_DN7100_c0_g3_i1	PREDICTED: protein amnionless-like [Megachile rotundata]	-	-	GO:0003674(molecular_function);GO:0008150(biological_process);GO:0016020(membrane);GO:0016021(integral component of membrane)	ENOG410XS7P(Amnionless homolog (Mouse))	NA	NA	NA	-	E2ADX9.1 PF14828.4;Amnionless;	-	34	51	28.01	259	413	162	1.15	1.58	0.97	10.14	17.17	7.34	1.23	11.55	-3.16051	down	0.00020004	0.0227364	yes
TRINITY_DN26315_c0_g1	1142	TRINITY_DN26315_c0_g1_i1	-	-	-	-	-	-	-	-	-	-	-	41.88	28.19	28.39	0	0	0	3.75	2.27	2.55	0	0	0	2.86	0	7.8953	up	0.000200554	0.0227364	yes
TRINITY_DN207_c1_g1	6369	TRINITY_DN207_c1_g1_i1;TRINITY_DN207_c1_g1_i10;TRINITY_DN207_c1_g1_i13;TRINITY_DN207_c1_g1_i14;TRINITY_DN207_c1_g1_i2;TRINITY_DN207_c1_g1_i3;TRINITY_DN207_c1_g1_i4;TRINITY_DN207_c1_g1_i5;TRINITY_DN207_c1_g1_i6;TRINITY_DN207_c1_g1_i7;TRINITY_DN207_c1_g1_i9	PREDICTED: LOW QUALITY PROTEIN: probable JmjC domain-containing histone demethylation protein 2C [Eufriesea mexicana]	JMJD1C	Probable JmjC domain-containing histone demethylation protein 2C OS=Homo sapiens GN=JMJD1C PE=1 SV=2	GO:0030097(hemopoiesis);GO:0061515(myeloid cell development)	ENOG410XTAA(lysine (K)-specific demethylase)	NA	NA	NA	-	-	-	1161.64	852.33	1375.93	1263.97	2713.59	3590.45	19.18	13.52	23.1	23.96	53.23	81.19	18.6	52.79	-1.45939	down	0.000202344	0.0227506	yes
TRINITY_DN1070_c0_g3	9249	TRINITY_DN1070_c0_g3_i1;TRINITY_DN1070_c0_g3_i2;TRINITY_DN1070_c0_g3_i3;TRINITY_DN1070_c0_g3_i4;TRINITY_DN1070_c0_g3_i5	PREDICTED: uncharacterized protein LOC100875107 isoform X1 [Megachile rotundata]	Kmt2e	Histone-lysine N-methyltransferase 2E OS=Mus musculus GN=Kmt2e PE=1 SV=2	GO:0001047(core promoter binding);GO:0005634(nucleus);GO:0005700(polytene chromosome);GO:0006343(establishment of chromatin silencing);GO:0016573(histone acetylation);GO:0035327(transcriptionally active chromatin);GO:0042054(histone methyltransferase activity);GO:0048477(oogenesis);GO:0070868(heterochromatin organization involved in chromatin silencing)	ENOG4111FV9(myeloid lymphoid or mixed-lineage leukemia 5 (trithorax homolog, Drosophila))	K09189	histone-lysine N-methyltransferase MLL5	EC:2.1.1.43	bter00310(Lysine degradation)	A0A087ZSU6.1 PF00856.26;SET;	-	1002.47	879.82	1047.92	1084.62	2196.16	2851.75	7.15	5.83	7.71	8.98	20.09	28.6	6.9	19.22	-1.36955	down	0.00020473	0.0227506	yes
TRINITY_DN4615_c0_g1	6765	TRINITY_DN4615_c0_g1_i1;TRINITY_DN4615_c0_g1_i10;TRINITY_DN4615_c0_g1_i100;TRINITY_DN4615_c0_g1_i101;TRINITY_DN4615_c0_g1_i102;TRINITY_DN4615_c0_g1_i103;TRINITY_DN4615_c0_g1_i104;TRINITY_DN4615_c0_g1_i105;TRINITY_DN4615_c0_g1_i106;TRINITY_DN4615_c0_g1_i107;TRINITY_DN4615_c0_g1_i108;TRINITY_DN4615_c0_g1_i109;TRINITY_DN4615_c0_g1_i11;TRINITY_DN4615_c0_g1_i110;TRINITY_DN4615_c0_g1_i111;TRINITY_DN461…	PREDICTED: lethal(2) giant larvae protein homolog 1 isoform X1 [Megachile rotundata]	Llgl1	Lethal(2) giant larvae protein homolog 1 OS=Rattus norvegicus GN=Llgl1 PE=1 SV=1	GO:0005096(GTPase activator activity);GO:0005886(plasma membrane);GO:0008593(regulation of Notch signaling pathway);GO:0017137(Rab GTPase binding);GO:0017157(regulation of exocytosis);GO:0019905(syntaxin binding);GO:0022008(neurogenesis);GO:0030864(cortical actin cytoskeleton);GO:0030866(cortical actin cytoskeleton organization);GO:0032878(regulation of establishment or maintenance of cell polari…	ENOG410XS6Z(Lethal giant larvae homolog)	K06094	lethal(2) giant larvae protein	-	ame04391(Hippo signaling pathway -fly)	A0A088ATY3.1 PF08596.8;Lgl_C;	-	3531.01	2858.03	3691.38	4085.33	6412.45	8922.4	61.86	45.39	69.7	81.27	151.82	221.53	58.98	151.54	-1.24998	down	0.000205966	0.0227506	yes
TRINITY_DN16621_c0_g1	4469	TRINITY_DN16621_c0_g1_i1;TRINITY_DN16621_c0_g1_i10;TRINITY_DN16621_c0_g1_i11;TRINITY_DN16621_c0_g1_i12;TRINITY_DN16621_c0_g1_i13;TRINITY_DN16621_c0_g1_i14;TRINITY_DN16621_c0_g1_i2;TRINITY_DN16621_c0_g1_i3;TRINITY_DN16621_c0_g1_i4;TRINITY_DN16621_c0_g1_i5;TRINITY_DN16621_c0_g1_i6;TRINITY_DN16621_c0_g1_i7;TRINITY_DN16621_c0_g1_i8;TRINITY_DN16621_c0_g1_i9	PREDICTED: nidogen-2 isoform X1 [Megachile rotundata]	NID1	Nidogen-1 OS=Homo sapiens GN=NID1 PE=1 SV=3	GO:0005509(calcium ion binding);GO:0005604(basement membrane);GO:0007160(cell-matrix adhesion)	ENOG410XR8N(nidogen 1)	NA	NA	NA	-	A0A087ZZ55.1 PF07474.10;G2F;	-	2582.74	2630.82	2514.91	2951.2	4873.36	8178.46	65.12	68.03	66.59	64.77	110.25	216.37	66.58	130.46	-1.36357	down	0.000208562	0.0227506	yes
TRINITY_DN580_c1_g2	6687	TRINITY_DN580_c1_g2_i1;TRINITY_DN580_c1_g2_i2	PREDICTED: dystroglycan-like isoform X1 [Megachile rotundata]	DAG1	Dystroglycan OS=Bos taurus GN=DAG1 PE=1 SV=1	GO:0005509(calcium ion binding);GO:0005515(protein binding);GO:0005886(plasma membrane);GO:0006110(regulation of glycolytic process);GO:0007016(cytoskeletal anchoring at plasma membrane);GO:0007163(establishment or maintenance of cell polarity);GO:0007293(germarium-derived egg chamber formation);GO:0007295(growth of a germarium-derived egg chamber);GO:0007309(oocyte axis specification);GO:0007314…	ENOG410XQTU(Dystroglycan 1 (Dystrophin-associated glycoprotein 1))	K06265	dystroglycan 1	-	ame04512(ECM-receptor interaction)	A0A088A6L1.1 PF05454.9;DAG1;	-	2040.77	1989.93	1712.42	2192.25	3694.14	5583.6	21.7	19.64	18.74	27.25	50.36	83.16	20.03	53.59	-1.31035	down	0.00020937	0.0227506	yes
TRINITY_DN1070_c0_g2	9606	TRINITY_DN1070_c0_g2_i1;TRINITY_DN1070_c0_g2_i2;TRINITY_DN1070_c0_g2_i3;TRINITY_DN1070_c0_g2_i4;TRINITY_DN1070_c0_g2_i5;TRINITY_DN1070_c0_g2_i6	PREDICTED: LOW QUALITY PROTEIN: uncharacterized protein LOC100883400 [Megachile rotundata]	-	-	GO:0005886(plasma membrane);GO:0008157(protein phosphatase 1 binding);GO:0016328(lateral plasma membrane)	ENOG4111C79(NA)	-	-	-	-	-	-	6282.11	4408.2	6186.75	7522.56	10975	11844.7	47.6	31.01	48.16	65.9	106.6	125.61	42.26	99.37	-1.1419	down	0.00020969	0.0227506	yes
TRINITY_DN4343_c0_g1	3637	TRINITY_DN4343_c0_g1_i1	PREDICTED: leukocyte elastase inhibitor [Dufourea novaeangliae]	Spn28Dc	Serine protease inhibitor 28Dc OS=Drosophila melanogaster GN=Spn28Dc PE=2 SV=2	GO:0004867(serine-type endopeptidase inhibitor activity);GO:0005615(extracellular space)	COG4826(serine-type endopeptidase inhibitor activity)	K13963	serpin B	-	mmu05146(Amoebiasis)	A0A088AS87.1 PF00079.18;Serpin;	-	624.51	650.66	537.9	891.61	1310.64	1122.15	12.18	11.74	10.78	20.17	32.16	30.1	11.57	27.48	-1.16933	down	0.000210435	0.0227506	yes
TRINITY_DN17789_c0_g3	989	TRINITY_DN17789_c0_g3_i1	heat shock protein [Tyrophagus putrescentiae]	HSPA1A	Heat shock 70 kDa protein 1A OS=Homo sapiens GN=HSPA1A PE=1 SV=1	GO:0005524(ATP binding)	COG0443(Heat shock protein)	K03283	heat shock 70kDa protein 1/2/6/8	-	tut03040(Spliceosome);tut04141(Protein processing in endoplasmic reticulum);tut04144(Endocytosis)	B7PAR6.1 PF00012.18;HSP70;	-	25.09	71.06	22	0	0	0	2.88	7.29	2.51	0	0	0	4.23	0	8.14988	up	0.000212217	0.0227924	yes
TRINITY_DN6183_c0_g1	5262	TRINITY_DN6183_c0_g1_i1	PREDICTED: uncharacterized protein LOC100877442 [Megachile rotundata]	HPSE	Heparanase OS=Bos taurus GN=HPSE PE=2 SV=2	GO:0005975(carbohydrate metabolic process);GO:0008284(positive regulation of cell proliferation);GO:0016020(membrane);GO:0016798(hydrolase activity, acting on glycosyl bonds);GO:0030198(extracellular matrix organization);GO:0043395(heparan sulfate proteoglycan binding)	ENOG410YDJW(Heparanase)	K07964	heparanase	EC:3.2.1.166	dnx00531(Glycosaminoglycan degradation)	K7JJN4.1 PF03662.12;Glyco_hydro_79n;	-	672.85	2344.91	123.13	13	136	6	8.69	28.1	1.64	0.19	2.23	0.11	12.81	0.84	4.07009	up	0.000221131	0.0233383	yes
TRINITY_DN23607_c0_g1	5132	TRINITY_DN23607_c0_g1_i1;TRINITY_DN23607_c0_g1_i2;TRINITY_DN23607_c0_g1_i3;TRINITY_DN23607_c0_g1_i4;TRINITY_DN23607_c0_g1_i5;TRINITY_DN23607_c0_g1_i6;TRINITY_DN23607_c0_g1_i7	PREDICTED: protein mesh isoform X1 [Megachile rotundata]	-	Protein mesh OS=Bombyx mori PE=1 SV=1	GO:0005515(protein binding);GO:0005920(smooth septate junction);GO:0007160(cell-matrix adhesion);GO:0090528(smooth septate junction assembly)	ENOG410YZ7Z(sushi domain containing 2)	NA	NA	NA	-	A0A088AMW9.1 PF00094.23;VWD;	-	2226.31	2059.42	2449.5	2622.13	4186.22	7760.61	41.73	38.59	51.12	53.22	83.41	166.43	43.81	101.02	-1.42658	down	0.00022142	0.0233383	yes
TRINITY_DN563_c1_g1	553	TRINITY_DN563_c1_g1_i1	-	-	-	-	-	-	-	-	-	-	-	0	0	0	0	129.81	218.21	0	0	0	0	44.8	79.76	0	41.52	-10.0409	down	0.000221589	0.0233383	yes
TRINITY_DN10087_c0_g3	1144	TRINITY_DN10087_c0_g3_i1	PREDICTED: titin isoform X2 [Mus musculus]	Ttn	Titin OS=Mus musculus GN=Ttn PE=1 SV=1	GO:0000166(nucleotide binding);GO:0000794(condensed nuclear chromosome);GO:0001701(in utero embryonic development);GO:0001756(somitogenesis);GO:0002020(protease binding);GO:0003007(heart morphogenesis);GO:0003300(cardiac muscle hypertrophy);GO:0004672(protein kinase activity);GO:0004674(protein serine/threonine kinase activity);GO:0004713(protein tyrosine kinase activity);GO:0005200(structural co…	ENOG410XQFD(myosin light chain kinase)	K12567	titin	EC:2.7.11.1	mmu05410(Hypertrophic cardiomyopathy (HCM));mmu05414(Dilated cardiomyopathy (DCM))	G3HAC6.1 PF07679.14;I-set;	-	57.78	23.71	21.67	0	0	0	5.16	1.91	1.94	0	0	0	3	0	7.97727	up	0.000228631	0.0239257	yes
TRINITY_DN2033_c0_g1	3744	TRINITY_DN2033_c0_g1_i1;TRINITY_DN2033_c0_g1_i2;TRINITY_DN2033_c0_g1_i3;TRINITY_DN2033_c0_g1_i4;TRINITY_DN2033_c0_g1_i5;TRINITY_DN2033_c0_g1_i6;TRINITY_DN2033_c0_g1_i7;TRINITY_DN2033_c0_g1_i8	PREDICTED: alkaline phosphatase 4-like isoform X1 [Megachile rotundata]	Aph4	Alkaline phosphatase 4 OS=Drosophila melanogaster GN=Aph4 PE=2 SV=3	GO:0004035(alkaline phosphatase activity);GO:0005576(extracellular region);GO:0005615(extracellular space);GO:0007399(nervous system development);GO:0009986(cell surface);GO:0016311(dephosphorylation);GO:0032504(multicellular organism reproduction);GO:0042045(epithelial fluid transport)	COG1785(alkaline phosphatase)	K01077	alkaline phosphatase	EC:3.1.3.1	ame00730(Thiamine metabolism);ame00790(Folate biosynthesis)	A0A088AUU8.1 PF00245.18;Alk_phosphatase;	-	6065.74	5791.24	5720.84	6420.15	11875.3	16682.7	177.55	157.99	175.41	221.88	438.3	651.16	170.32	437.11	-1.30129	down	0.000232648	0.0241887	yes
TRINITY_DN26390_c0_g1	303	TRINITY_DN26390_c0_g1_i1	-	-	-	-	-	-	-	-	-	-	-	6.73	0	4.2	0	606.74	530.6	6.31	0	4	0	734.11	694.62	3.44	476.24	-6.93076	down	0.000234108	0.0241887	yes
TRINITY_DN1381_c1_g1	4402	TRINITY_DN1381_c1_g1_i1;TRINITY_DN1381_c1_g1_i2	PREDICTED: POU domain, class 2, transcription factor 1-like isoform X2 [Megachile rotundata]	nub	Protein nubbin OS=Drosophila melanogaster GN=nub PE=2 SV=1	GO:0000976(transcription regulatory region sequence-specific DNA binding);GO:0002809(negative regulation of antibacterial peptide biosynthetic process);GO:0006357(regulation of transcription by RNA polymerase II);GO:0007389(pattern specification process);GO:0007402(ganglion mother cell fate determination);GO:0007419(ventral cord development);GO:0035220(wing disc development);GO:0036022(limb joint…	ENOG410XQ7X(POU class)	NA	NA	NA	-	K1PV68.1 PF00157.15;Pou;	Pou	328.13	276.35	260.59	446.91	709.1	1004.24	5.23	4.08	4.26	8.27	14.31	22.16	4.52	14.91	-1.62898	down	0.000244095	0.0248343	yes
TRINITY_DN14046_c0_g1	1117	TRINITY_DN14046_c0_g1_i1	cytochrome oxidase subunit 1 (mitochondrion) [Rhizoglyphus robini]	MT-CO1	Cytochrome c oxidase subunit 1 OS=Myxine glutinosa GN=MT-CO1 PE=3 SV=2	GO:0045277(respiratory chain complex IV)	COG0843(Cytochrome C oxidase subunit I)	K02256	cytochrome c oxidase subunit 1	EC:1.9.3.1	obi00190(Oxidative phosphorylation)	Q34391.2 PF00115.18;COX1;	-	30.09	83.35	15	0	0	0	2.79	6.97	1.39	0	0	0	3.72	0	8.26161	up	0.000244441	0.0248343	yes
TRINITY_DN775_c0_g1	14894	TRINITY_DN775_c0_g1_i1;TRINITY_DN775_c0_g1_i11;TRINITY_DN775_c0_g1_i12;TRINITY_DN775_c0_g1_i13;TRINITY_DN775_c0_g1_i14;TRINITY_DN775_c0_g1_i15;TRINITY_DN775_c0_g1_i16;TRINITY_DN775_c0_g1_i17;TRINITY_DN775_c0_g1_i19;TRINITY_DN775_c0_g1_i2;TRINITY_DN775_c0_g1_i20;TRINITY_DN775_c0_g1_i21;TRINITY_DN775_c0_g1_i22;TRINITY_DN775_c0_g1_i23;TRINITY_DN775_c0_g1_i24;TRINITY_DN775_c0_g1_i25;TRINITY_DN775_c0_…	PREDICTED: microtubule-associated protein futsch, partial [Megachile rotundata]	futsch	Microtubule-associated protein futsch OS=Drosophila melanogaster GN=futsch PE=1 SV=4	GO:0000226(microtubule cytoskeleton organization);GO:0003779(actin binding);GO:0005515(protein binding);GO:0005829(cytosol);GO:0005874(microtubule);GO:0005875(microtubule associated complex);GO:0007017(microtubule-based process);GO:0007399(nervous system development);GO:0007409(axonogenesis);GO:0007528(neuromuscular junction development);GO:0008017(microtubule binding);GO:0008088(axo-dendritic tr…	ENOG410XRYM(Microtubule-associated protein)	NA	NA	NA	-	-	-	1236.61	1124.67	1073.53	1354.43	2504.33	2539.32	10.82	10.23	9.48	10.19	14.82	18.71	10.18	14.57	-1.19593	down	0.000245278	0.0248343	yes
TRINITY_DN11348_c0_g1	696	TRINITY_DN11348_c0_g1_i1	myozenin-2 isoform 1 [Mus musculus]	Myoz2	Myozenin-2 OS=Mus musculus GN=Myoz2 PE=1 SV=1	GO:0003779(actin binding);GO:0005737(cytoplasm);GO:0015629(actin cytoskeleton);GO:0030018(Z disc);GO:0030239(myofibril assembly);GO:0031433(telethonin binding);GO:0051373(FATZ binding)	ENOG410ZK6W(Myozenin 2)	-	-	-	-	A0A0G2KAQ5.1 PF05556.9;Calsarcin;	-	63	25	19	0	0	0	15.08	5.23	4.39	0	0	0	8.23	0	8.01601	up	0.000246442	0.0248343	yes
TRINITY_DN2832_c0_g2	1239	TRINITY_DN2832_c0_g2_i1	heat shock protein beta-7 [Mus musculus]	Hspb7	Heat shock protein beta-7 OS=Mus musculus GN=Hspb7 PE=1 SV=3	GO:0005634(nucleus);GO:0005654(nucleoplasm);GO:0005737(cytoplasm);GO:0005739(mitochondrion);GO:0009408(response to heat);GO:0015629(actin cytoskeleton);GO:0016235(aggresome);GO:0031005(filamin binding)	ENOG410YERS(Heat shock protein)	NA	NA	NA	-	H2R9G0.1 PF00011.19;HSP20;	-	159.27	87.27	55	3.06	0	0	12.51	6.21	4.35	0.28	0	0	7.69	0.09	6.20103	up	0.000251509	0.0250384	yes
TRINITY_DN1927_c0_g1	7645	TRINITY_DN1927_c0_g1_i1;TRINITY_DN1927_c0_g1_i10;TRINITY_DN1927_c0_g1_i12;TRINITY_DN1927_c0_g1_i13;TRINITY_DN1927_c0_g1_i14;TRINITY_DN1927_c0_g1_i2;TRINITY_DN1927_c0_g1_i3;TRINITY_DN1927_c0_g1_i4;TRINITY_DN1927_c0_g1_i5;TRINITY_DN1927_c0_g1_i6;TRINITY_DN1927_c0_g1_i7;TRINITY_DN1927_c0_g1_i8;TRINITY_DN1927_c0_g1_i9	PREDICTED: phosphofurin acidic cluster sorting protein 2 isoform X7 [Megachile rotundata]	PACS2	Phosphofurin acidic cluster sorting protein 2 OS=Homo sapiens GN=PACS2 PE=1 SV=3	GO:0044325(ion channel binding)	ENOG410XQNV(phosphofurin acidic cluster sorting protein)	-	-	-	-	A0A088ABT8.1 PF10254.7;Pacs-1;	-	1792.86	1591.19	1525.82	2218.3	3187.56	2894.71	29.6	26.23	25.91	55.71	94.23	88.68	27.25	79.54	-1.05284	down	0.000251534	0.0250384	yes
TRINITY_DN4850_c0_g1	2518	TRINITY_DN4850_c0_g1_i1;TRINITY_DN4850_c0_g1_i10;TRINITY_DN4850_c0_g1_i11;TRINITY_DN4850_c0_g1_i12;TRINITY_DN4850_c0_g1_i13;TRINITY_DN4850_c0_g1_i14;TRINITY_DN4850_c0_g1_i15;TRINITY_DN4850_c0_g1_i16;TRINITY_DN4850_c0_g1_i17;TRINITY_DN4850_c0_g1_i18;TRINITY_DN4850_c0_g1_i19;TRINITY_DN4850_c0_g1_i2;TRINITY_DN4850_c0_g1_i20;TRINITY_DN4850_c0_g1_i22;TRINITY_DN4850_c0_g1_i23;TRINITY_DN4850_c0_g1_i24;T…	PREDICTED: LOW QUALITY PROTEIN: uncharacterized protein LOC105663484 [Megachile rotundata]	-	-	-	ENOG4111C0C(NA)	-	-	-	-	-	-	18135.5	20277.5	15352.2	23772.3	30264.8	43604.3	2278.25	2212.28	2090.39	4026.11	5356.66	8682.26	2193.64	6021.68	-1.1716	down	0.000254094	0.0251399	yes
TRINITY_DN776_c1_g2	3581	TRINITY_DN776_c1_g2_i1	-	-	-	-	-	-	-	-	-	-	-	366.1	233.3	352.65	593.53	864.64	729.13	7.27	4.28	7.19	13.66	21.58	19.9	6.25	18.38	-1.48832	down	0.000258323	0.0254044	yes
TRINITY_DN21999_c0_g1	2971	TRINITY_DN21999_c0_g1_i1;TRINITY_DN21999_c0_g1_i2;TRINITY_DN21999_c0_g1_i3;TRINITY_DN21999_c0_g1_i4;TRINITY_DN21999_c0_g1_i5	PREDICTED: MAM and LDL-receptor class A domain-containing protein 2-like isoform X1 [Megachile rotundata]	-	MAM and LDL-receptor class A domain-containing protein 2 (Fragment) OS=Acropora millepora PE=1 SV=1	GO:0005615(extracellular space);GO:0005794(Golgi apparatus);GO:0046658(anchored component of plasma membrane)	ENOG410XPYU(MAM domain containing glycosylphosphatidylinositol anchor)	NA	NA	NA	-	A0A088AS55.1 PF00629.21;MAM;	-	745.72	896.55	677.68	1404.44	1483.94	1146.64	24.49	27	22.74	53.64	60.23	50.81	24.74	54.89	-1.09029	down	0.000260696	0.0254842	yes
TRINITY_DN2071_c1_g1	1812	TRINITY_DN2071_c1_g1_i1;TRINITY_DN2071_c1_g1_i2	PREDICTED: complexin isoform X2 [Megachile rotundata]	-	-	-	ENOG410ZHUI(complexin)	NA	NA	NA	-	A0A088AF21.1 PF05835.10;Synaphin;	-	412.93	365.3	339.56	614.36	890.01	797.47	21.76	18.61	19.12	38.95	58.04	56.52	19.83	51.17	-1.33644	down	0.000267108	0.025802	yes
TRINITY_DN999_c0_g1	6334	TRINITY_DN999_c0_g1_i1;TRINITY_DN999_c0_g1_i2;TRINITY_DN999_c0_g1_i3;TRINITY_DN999_c0_g1_i4	PREDICTED: uncharacterized protein LOC100877957 [Megachile rotundata]	Kdm4B	Probable lysine-specific demethylase 4B OS=Drosophila melanogaster GN=Kdm4B PE=3 SV=3	GO:0005634(nucleus);GO:0016577(histone demethylation);GO:0032454(histone demethylase activity (H3-K9 specific));GO:0033169(histone H3-K9 demethylation);GO:0045892(negative regulation of transcription, DNA-templated);GO:0051864(histone demethylase activity (H3-K36 specific));GO:0070544(histone H3-K36 demethylation)	COG5141(phd finger)	NA	NA	NA	-	E2A2I7.1 PF02373.20;JmjC;	Others	857.78	657.52	955.25	1187.58	1627.6	1673.78	9.19	6.55	10.54	14.78	22.19	25.07	8.76	20.68	-1.15434	down	0.000272206	0.0260769	yes
TRINITY_DN17180_c0_g2	6492	TRINITY_DN17180_c0_g2_i1	PREDICTED: uncharacterized protein LOC100882272 [Megachile rotundata]	HMCN1	Hemicentin-1 OS=Homo sapiens GN=HMCN1 PE=1 SV=2	GO:0070492(oligosaccharide binding)	ENOG4111MVR(EGF_like)	NA	NA	NA	-	E2BI18.1 PF02494.14;HYR;	-	632.01	517.97	457.85	801.09	1154.72	1081.32	6.5	4.95	4.86	9.56	15.16	15.55	5.44	13.42	-1.21488	down	0.000273502	0.0260769	yes
TRINITY_DN948_c0_g5	2783	TRINITY_DN948_c0_g5_i1	PREDICTED: mothers against decapentaplegic homolog 7 [Habropoda laboriosa]	-	-	-	ENOG410XQKU(SMAD family member)	K04677	mothers against decapentaplegic homolog 6	-	bter04350(TGF-beta signaling pathway)	-	-	265.48	252.18	310.02	364.06	742.52	1141.92	7.07	6.2	8.46	11.24	24.62	41.33	7.24	25.73	-1.75112	down	0.000274746	0.0260769	yes
TRINITY_DN3096_c0_g1	6073	TRINITY_DN3096_c0_g1_i1;TRINITY_DN3096_c0_g1_i10;TRINITY_DN3096_c0_g1_i100;TRINITY_DN3096_c0_g1_i101;TRINITY_DN3096_c0_g1_i102;TRINITY_DN3096_c0_g1_i103;TRINITY_DN3096_c0_g1_i104;TRINITY_DN3096_c0_g1_i105;TRINITY_DN3096_c0_g1_i106;TRINITY_DN3096_c0_g1_i107;TRINITY_DN3096_c0_g1_i108;TRINITY_DN3096_c0_g1_i109;TRINITY_DN3096_c0_g1_i11;TRINITY_DN3096_c0_g1_i110;TRINITY_DN3096_c0_g1_i111;TRINITY_DN309…	probable citrate synthase 2, mitochondrial [Bombus impatiens]	AAEL002956	Probable citrate synthase 1, mitochondrial OS=Aedes aegypti GN=AAEL002956 PE=3 SV=1	GO:0004108(citrate (Si)-synthase activity);GO:0005759(mitochondrial matrix);GO:0005975(carbohydrate metabolic process)	COG0372(citrate synthase)	K01647	citrate synthase	EC:2.3.3.1	bim00020(Citrate cycle (TCA cycle));bim00630(Glyoxylate and dicarboxylate metabolism)	F4W8I9.1 PF00285.19;Citrate_synt;	-	34430.7	30912.9	26013	48287.4	52836.2	48225.1	417.43	349.73	324.79	680.18	820.73	814.25	363.98	771.72	-1.0055	down	0.000276366	0.0260791	yes
TRINITY_DN3440_c0_g1	930	TRINITY_DN3440_c0_g1_i1	-	-	-	-	-	-	-	-	-	-	-	14.3	97.42	25.26	0	0	0	1.84	11.15	3.22	0	0	0	5.4	0	8.35157	up	0.00028404	0.0266492	yes
TRINITY_DN6489_c0_g1	699	TRINITY_DN6489_c0_g1_i1	cytochrome c oxidase subunit II (mitochondrion) [Sancassania berlesei]	COII	Cytochrome c oxidase subunit 2 OS=Branchiostoma floridae GN=COII PE=3 SV=1	GO:0004129(cytochrome-c oxidase activity);GO:0045277(respiratory chain complex IV)	COG1622(Subunits I and II form the functional core of the enzyme complex. Electrons originating in cytochrome c are transferred via heme a and Cu(A) to the binuclear center formed by heme a3 and Cu(B) (By similarity))	K02261	cytochrome c oxidase subunit 2	-	zne00190(Oxidative phosphorylation)	Q3SUL5.1 PF00116.18;COX2;	-	19	92	19	0	0	0	4.5	19.06	4.34	0	0	0	9.3	0	8.28449	up	0.000287225	0.0266782	yes
TRINITY_DN14_c1_g1	2211	TRINITY_DN14_c1_g1_i1	elongation factor 1-alpha [Apis mellifera]	-	Elongation factor 1-alpha OS=Apis mellifera PE=3 SV=1	GO:0003746(translation elongation factor activity);GO:0003924(GTPase activity);GO:0005525(GTP binding);GO:0005737(cytoplasm);GO:0005853(eukaryotic translation elongation factor 1 complex);GO:0006412(translation);GO:0006414(translational elongation)	COG5256(This protein promotes the GTP-dependent binding of aminoacyl-tRNA to the A-site of ribosomes during protein biosynthesis (By similarity))	K03231	elongation factor 1-alpha	-	ame03013(RNA transport)	L5K105.1 PF00009.25;GTP_EFTU;	-	2739.51	2136.22	2617.89	2929.6	5172.92	5626.03	96.61	69.29	94.3	119.78	224.24	265.81	86.73	203.28	-1.17156	down	0.000287618	0.0266782	yes
TRINITY_DN990_c0_g1	5897	TRINITY_DN990_c0_g1_i1;TRINITY_DN990_c0_g1_i2;TRINITY_DN990_c0_g1_i3;TRINITY_DN990_c0_g1_i4	PREDICTED: mucin-17 [Megachile rotundata]	PTPN7	Tyrosine-protein phosphatase non-receptor type 7 OS=Homo sapiens GN=PTPN7 PE=1 SV=3	GO:0004725(protein tyrosine phosphatase activity);GO:0005575(cellular_component);GO:0006470(protein dephosphorylation)	COG5599(protein tyrosine phosphatase)	NA	NA	NA	-	A0A087ZNH8.1 PF00102.25;Y_phosphatase;	-	1165.42	981.77	1048.93	1218.99	2229	2718.93	20.56	17.29	17.62	23.59	41.51	54.15	18.49	39.75	-1.25174	down	0.00028996	0.0267435	yes
TRINITY_DN2130_c0_g1	4416	TRINITY_DN2130_c0_g1_i1	-	-	-	-	-	-	-	-	-	-	-	3126.26	3008.35	2874.53	3770.39	5910.77	5472.69	49.01	43.68	46.35	68.55	117.23	118.77	46.35	101.52	-1.0461	down	0.000292144	0.0267935	yes
TRINITY_DN1110_c0_g2	1403	TRINITY_DN1110_c0_g2_i1	PREDICTED: neprilysin-like [Megachile rotundata]	-	Neprilysin-1 OS=Trittame loki PE=1 SV=1	GO:0004222(metalloendopeptidase activity);GO:0005886(plasma membrane);GO:0006508(proteolysis);GO:0008233(peptidase activity);GO:0008237(metallopeptidase activity);GO:0016020(membrane);GO:0016021(integral component of membrane);GO:0016787(hydrolase activity);GO:0046872(metal ion binding)	COG3590(endothelin-converting enzyme)	NA	NA	NA	-	A0A0J7L0T2.1 PF05649.11;Peptidase_M13_N;	-	200.99	212.01	168.1	496.23	624.02	481.69	13.08	12.55	11.06	37.41	47.83	40.02	12.23	41.75	-1.7553	down	0.000293785	0.0267935	yes
TRINITY_DN5076_c0_g1	6575	TRINITY_DN5076_c0_g1_i1;TRINITY_DN5076_c0_g1_i2;TRINITY_DN5076_c0_g1_i3;TRINITY_DN5076_c0_g1_i4;TRINITY_DN5076_c0_g1_i5;TRINITY_DN5076_c0_g1_i7	PREDICTED: RNA-binding protein Nova-1 isoform X1 [Megachile rotundata]	NOVA1	RNA-binding protein Nova-1 OS=Macaca fascicularis GN=NOVA1 PE=2 SV=1	GO:0000398(mRNA splicing, via spliceosome);GO:0003729(mRNA binding);GO:0005634(nucleus);GO:0005829(cytosol)	ENOG410XRZD(Neuro-oncological ventral antigen)	NA	NA	NA	-	E9JAZ8.1 PF00013.27;KH_1;	Others	730.96	613.74	680.15	919.83	1523.64	1265.61	13.81	12.08	13.19	19.51	37.66	36.97	13.03	31.38	-1.16469	down	0.000298768	0.0270966	yes
TRINITY_DN3408_c0_g1	6615	TRINITY_DN3408_c0_g1_i1;TRINITY_DN3408_c0_g1_i10;TRINITY_DN3408_c0_g1_i11;TRINITY_DN3408_c0_g1_i12;TRINITY_DN3408_c0_g1_i13;TRINITY_DN3408_c0_g1_i14;TRINITY_DN3408_c0_g1_i15;TRINITY_DN3408_c0_g1_i16;TRINITY_DN3408_c0_g1_i17;TRINITY_DN3408_c0_g1_i18;TRINITY_DN3408_c0_g1_i19;TRINITY_DN3408_c0_g1_i2;TRINITY_DN3408_c0_g1_i20;TRINITY_DN3408_c0_g1_i21;TRINITY_DN3408_c0_g1_i3;TRINITY_DN3408_c0_g1_i4;TRI…	PREDICTED: protein kinase C, brain isozyme [Megachile rotundata]	Pkc53E	Protein kinase C, brain isozyme OS=Drosophila melanogaster GN=Pkc53E PE=2 SV=2	GO:0004674(protein serine/threonine kinase activity);GO:0005622(intracellular);GO:0018105(peptidyl-serine phosphorylation);GO:0035556(intracellular signal transduction)	ENOG410XNPH(protein serine/threonine kinase activity)	K02677	classical protein kinase C alpha type	EC:2.7.11.13	bter04310(Wnt signaling pathway);bter04070(Phosphatidylinositol signaling system);bter04150(mTOR signaling pathway);bter04745(Phototransduction - fly);bter04933(AGE-RAGE signaling pathway in diabetic complications)	A0A067QT55.1 PF00069.23;Pkinase;	-	3207.07	3227.83	2797.5	3698.55	5760.95	6614.05	36.49	33.85	32.85	50.12	85.31	104.01	34.4	79.81	-1.10326	down	0.000301991	0.0272376	yes
TRINITY_DN7873_c0_g1	2031	TRINITY_DN7873_c0_g1_i1;TRINITY_DN7873_c0_g1_i2;TRINITY_DN7873_c0_g1_i3	retinal dehydrogenase 1 isoform X1 [Pan troglodytes]	ALDH1A1	Retinal dehydrogenase 1 OS=Homo sapiens GN=ALDH1A1 PE=1 SV=2	GO:0001758(retinal dehydrogenase activity);GO:0004029(aldehyde dehydrogenase (NAD) activity);GO:0005096(GTPase activator activity);GO:0005497(androgen binding);GO:0005737(cytoplasm);GO:0005829(cytosol);GO:0006069(ethanol oxidation);GO:0006081(cellular aldehyde metabolic process);GO:0018479(benzaldehyde dehydrogenase (NAD+) activity);GO:0042572(retinol metabolic process);GO:0043547(positive regula…	COG1012(Dehydrogenase)	K07249	retinal dehydrogenase	EC:1.2.1.36	hsa00830(Retinol metabolism)	F7CKH3.1 PF00171.20;Aldedh;	-	475.1	413	2	5	0	0	18.87	14.9	0.08	0.23	0	0	11.28	0.08	7.07336	up	0.000308429	0.0275691	yes
TRINITY_DN20122_c0_g1	1116	TRINITY_DN20122_c0_g1_i1	myomesin-1 isoform 2 [Mus musculus]	Myom1	Myomesin-1 OS=Mus musculus GN=Myom1 PE=1 SV=2	GO:0005200(structural constituent of cytoskeleton);GO:0005737(cytoplasm);GO:0005856(cytoskeleton);GO:0005859(muscle myosin complex);GO:0005865(striated muscle thin filament);GO:0006936(muscle contraction);GO:0006941(striated muscle contraction);GO:0007015(actin filament organization);GO:0008307(structural constituent of muscle);GO:0010628(positive regulation of gene expression);GO:0010737(protein…	ENOG410ZSRR(myomesin)	NA	NA	NA	-	G1R5D9.1 PF07679.14;I-set;	-	51.73	18	25	0	0	0	4.81	1.51	2.33	0	0	0	2.88	0	7.85116	up	0.000309044	0.0275691	yes
TRINITY_DN8655_c0_g1	4255	TRINITY_DN8655_c0_g1_i1;TRINITY_DN8655_c0_g1_i2;TRINITY_DN8655_c0_g1_i3;TRINITY_DN8655_c0_g1_i4;TRINITY_DN8655_c0_g1_i5;TRINITY_DN8655_c0_g1_i6	PREDICTED: 6-phosphofructo-2-kinase/fructose-2,6-bisphosphatase-like isoform X1 [Megachile rotundata]	-	6-phosphofructo-2-kinase/fructose-2,6-bisphosphatase OS=Lithobates catesbeiana PE=2 SV=1	GO:0003824(catalytic activity);GO:0003873(6-phosphofructo-2-kinase activity);GO:0005524(ATP binding);GO:0006000(fructose metabolic process);GO:0006003(fructose 2,6-bisphosphate metabolic process);GO:0008152(metabolic process);GO:0046983(protein dimerization activity)	COG0406(Phosphoglycerate mutase)	K01103	6-phosphofructo-2-kinase / fructose-2,6-biphosphatase 3	EC:2.7.1.105 3.1.3.46	bim00051(Fructose and mannose metabolism)	A0A087ZN70.1 PF01591.16;6PF2K;	-	23006.7	21558.4	19719.4	27572.6	37610.1	45675.3	447.76	415.36	397.75	535.01	789.99	1051	420.29	792	-1.09014	down	0.000312617	0.0277363	yes
TRINITY_DN855_c0_g1	1203	TRINITY_DN855_c0_g1_i1;TRINITY_DN855_c0_g1_i2	PREDICTED: pro-resilin-like [Megachile rotundata]	resilin	Pro-resilin OS=Drosophila melanogaster GN=resilin PE=1 SV=1	GO:0005615(extracellular space);GO:0008010(structural constituent of chitin-based larval cuticle);GO:0031012(extracellular matrix);GO:0040003(chitin-based cuticle development);GO:0042302(structural constituent of cuticle)	ENOG41101NF(URI1, prefoldin-like chaperone)	K05747	Wiskott-Aldrich syndrome protein	-	fcd04144(Endocytosis)	A0A087ZNY8.1 PF00379.21;Chitin_bind_4;	-	1341.98	1147.86	766.95	1283.6	2269.52	3086.67	111.7	86.37	64.13	123.7	217.04	318.29	87.4	219.68	-1.34112	down	0.000320764	0.0283053	yes
TRINITY_DN1502_c0_g1	3686	TRINITY_DN1502_c0_g1_i1;TRINITY_DN1502_c0_g1_i10;TRINITY_DN1502_c0_g1_i11;TRINITY_DN1502_c0_g1_i12;TRINITY_DN1502_c0_g1_i13;TRINITY_DN1502_c0_g1_i14;TRINITY_DN1502_c0_g1_i15;TRINITY_DN1502_c0_g1_i16;TRINITY_DN1502_c0_g1_i17;TRINITY_DN1502_c0_g1_i18;TRINITY_DN1502_c0_g1_i2;TRINITY_DN1502_c0_g1_i20;TRINITY_DN1502_c0_g1_i21;TRINITY_DN1502_c0_g1_i22;TRINITY_DN1502_c0_g1_i23;TRINITY_DN1502_c0_g1_i24;T…	PREDICTED: kynurenine/alpha-aminoadipate aminotransferase, mitochondrial-like [Megachile rotundata]	Aadat	Kynurenine/alpha-aminoadipate aminotransferase, mitochondrial OS=Mus musculus GN=Aadat PE=1 SV=1	GO:0005634(nucleus);GO:0005829(cytosol);GO:0008793(aromatic-amino-acid:2-oxoglutarate aminotransferase activity);GO:0009058(biosynthetic process);GO:0009072(aromatic amino acid family metabolic process);GO:0030170(pyridoxal phosphate binding);GO:0047536(2-aminoadipate transaminase activity)	COG1167(Transcriptional regulator, gntR family)	K00825	kynurenine/2-aminoadipate aminotransferase	EC:2.6.1.7 2.6.1.39	bter00300(Lysine biosynthesis);bter00310(Lysine degradation);bter00380(Tryptophan metabolism)	A0A088AJ75.1 PF00155.19;Aminotran_1_2;	-	435.99	455.18	273	898	655.26	867	15.86	15.07	10.45	37.21	28.66	42.76	13.79	36.21	-1.36344	down	0.000323891	0.0283379	yes
TRINITY_DN10903_c0_g1	395	TRINITY_DN10903_c0_g1_i1	PREDICTED: facilitated trehalose transporter Tret1-like isoform X2 [Megachile rotundata]	-	-	GO:0005351(carbohydrate:proton symporter activity);GO:0005355(glucose transmembrane transporter activity);GO:0005887(integral component of plasma membrane);GO:0016021(integral component of membrane);GO:0046323(glucose import)	ENOG410XNQK(Transporter)	NA	NA	NA	-	A0A087ZYT1.1 PF00083.22;Sugar_tr;	-	0	0	0	3.02	71.05	67.9	0	0	0	2.55	47.64	48.7	0	32.96	-8.72982	down	0.000325309	0.0283379	yes
TRINITY_DN265_c2_g1	2832	TRINITY_DN265_c2_g1_i1;TRINITY_DN265_c2_g1_i2;TRINITY_DN265_c2_g1_i3;TRINITY_DN265_c2_g1_i4;TRINITY_DN265_c2_g1_i5;TRINITY_DN265_c2_g1_i6;TRINITY_DN265_c2_g1_i7	-	-	-	-	-	-	-	-	-	-	-	2479.6	2292.87	2427.32	2830.12	4334.82	6081.55	103.76	86.69	120.05	148.77	222.61	370.5	103.5	247.29	-1.1862	down	0.000326342	0.0283379	yes
TRINITY_DN2445_c0_g2	5319	TRINITY_DN2445_c0_g2_i1;TRINITY_DN2445_c0_g2_i3	-	-	-	-	-	-	-	-	-	-	-	665.56	516.76	570.41	820.52	1373.12	1087.47	8.5	6.13	7.52	12.16	22.32	19.35	7.38	17.94	-1.19466	down	0.000333817	0.0288337	yes
TRINITY_DN1526_c0_g1	4831	TRINITY_DN1526_c0_g1_i10;TRINITY_DN1526_c0_g1_i11;TRINITY_DN1526_c0_g1_i12;TRINITY_DN1526_c0_g1_i2;TRINITY_DN1526_c0_g1_i3;TRINITY_DN1526_c0_g1_i4;TRINITY_DN1526_c0_g1_i5;TRINITY_DN1526_c0_g1_i6;TRINITY_DN1526_c0_g1_i7;TRINITY_DN1526_c0_g1_i8;TRINITY_DN1526_c0_g1_i9	PREDICTED: serine/threonine-protein kinase tricorner-like isoform X1 [Apis dorsata]	trc	Serine/threonine-protein kinase tricorner OS=Drosophila pseudoobscura pseudoobscura GN=trc PE=3 SV=1	GO:0004674(protein serine/threonine kinase activity);GO:0005622(intracellular);GO:0018105(peptidyl-serine phosphorylation);GO:0035556(intracellular signal transduction)	ENOG410XQC0(serine threonine-protein kinase)	NA	NA	NA	-	A0A0J7LA65.1 PF00069.23;Pkinase;	-	4987.79	4502.75	4937.66	5968.95	8389.39	10341.2	110.37	92.15	108.71	137.14	212.59	284.5	103.74	211.41	-1.07733	down	0.000343917	0.0294085	yes
TRINITY_DN98_c0_g1	5950	TRINITY_DN98_c0_g1_i1;TRINITY_DN98_c0_g1_i2;TRINITY_DN98_c0_g1_i3;TRINITY_DN98_c0_g1_i4;TRINITY_DN98_c0_g1_i5;TRINITY_DN98_c0_g1_i6;TRINITY_DN98_c0_g1_i7	PREDICTED: AF4/FMR2 family member 4 isoform X1 [Megachile rotundata]	lilli	AF4/FMR2 family member 4 OS=Drosophila willistoni GN=lilli PE=3 SV=1	GO:0003700(DNA binding transcription factor activity);GO:0005634(nucleus);GO:0006355(regulation of transcription, DNA-templated);GO:0007366(periodic partitioning by pair rule gene);GO:0008361(regulation of cell size);GO:0032368(regulation of lipid transport);GO:0042051(compound eye photoreceptor development);GO:0051493(regulation of cytoskeleton organization)	ENOG410XRXU(AF4 FMR2 family, member)	NA	NA	NA	-	A0A088AUJ2.1 PF05110.11;AF-4;	AF-4	1400.32	1026.11	1375.43	1454	2684.02	3152.51	18.12	11.33	19.04	20.22	42.64	53.85	16.16	38.9	-1.23928	down	0.000344075	0.0294085	yes
TRINITY_DN3343_c0_g2	1178	TRINITY_DN3343_c0_g2_i1	PREDICTED: peptidyl-prolyl cis-trans isomerase 5 [Megachile rotundata]	cyn-5	Peptidyl-prolyl cis-trans isomerase 5 OS=Caenorhabditis elegans GN=cyn-5 PE=1 SV=2	GO:0003755(peptidyl-prolyl cis-trans isomerase activity)	ENOG410XQQJ(Ccr4-NOT transcription complex, subunit)	NA	NA	NA	-	K7J5M8.1 PF00160.19;Pro_isomerase;	-	2360.47	2945.09	2230.41	1279.7	823.98	502.87	200.82	226.36	190.5	126.09	80.35	52.96	205.89	86.47	1.24439	up	0.00035891	0.0303451	yes
TRINITY_DN5878_c0_g1	624	TRINITY_DN5878_c0_g1_i1;TRINITY_DN5878_c0_g1_i2;TRINITY_DN5878_c0_g1_i3	muscle LIM protein 1-like [Dermatophagoides pteronyssinus]	Mlp60A	Muscle LIM protein 1 OS=Drosophila melanogaster GN=Mlp60A PE=2 SV=1	GO:0005634(nucleus);GO:0015629(actin cytoskeleton);GO:0030018(Z disc);GO:0060537(muscle tissue development)	ENOG410Z840(Cysteine and glycine-rich protein 3 (Cardiac LIM protein))	NA	NA	NA	-	B7PFU3.1 PF00412.20;LIM;	-	23	84	13	0	0	0	8.88	28.49	4.81	0	0	0	14.06	0	8.16724	up	0.000359338	0.0303451	yes
TRINITY_DN19110_c0_g1	878	TRINITY_DN19110_c0_g1_i1	PREDICTED: uncharacterized protein LOC100876028 [Megachile rotundata]	-	-	-	ENOG4111ZZE(Putative death-receptor fusion protein (DUF2428))	-	-	-	-	-	-	15.33	41.82	30.87	0	0	0	2.21	5.33	4.38	0	0	0	3.97	0	7.74097	up	0.000360785	0.0303451	yes
TRINITY_DN227_c1_g1	3117	TRINITY_DN227_c1_g1_i1;TRINITY_DN227_c1_g1_i2;TRINITY_DN227_c1_g1_i3	PREDICTED: protein gustavus [Megachile rotundata]	gus	Protein gustavus OS=Drosophila melanogaster GN=gus PE=1 SV=2	GO:0004842(ubiquitin-protein transferase activity);GO:0005515(protein binding);GO:0005634(nucleus);GO:0005737(cytoplasm);GO:0005938(cell cortex);GO:0007280(pole cell migration);GO:0007281(germ cell development);GO:0007314(oocyte anterior/posterior axis specification);GO:0007315(pole plasm assembly);GO:0007472(wing disc morphogenesis);GO:0008104(protein localization);GO:0019005(SCF ubiquitin ligas…	ENOG410XQC1(splA ryanodine receptor domain and SOCS box containing)	NA	NA	NA	-	A0A088AVN3.1 PF00622.26;SPRY;	-	859.28	721.26	857.58	1008.86	1596.31	1898.21	20.18	15.62	20.61	27.36	46.85	60.82	18.8	45.01	-1.18547	down	0.000362469	0.0303451	yes
TRINITY_DN2552_c0_g1	5068	TRINITY_DN2552_c0_g1_i1;TRINITY_DN2552_c0_g1_i10;TRINITY_DN2552_c0_g1_i11;TRINITY_DN2552_c0_g1_i12;TRINITY_DN2552_c0_g1_i2;TRINITY_DN2552_c0_g1_i3;TRINITY_DN2552_c0_g1_i4;TRINITY_DN2552_c0_g1_i5;TRINITY_DN2552_c0_g1_i6;TRINITY_DN2552_c0_g1_i7;TRINITY_DN2552_c0_g1_i8;TRINITY_DN2552_c0_g1_i9	PREDICTED: serine/threonine-protein kinase Nek3 isoform X2 [Megachile rotundata]	sbk1	Serine/threonine-protein kinase SBK1 OS=Danio rerio GN=sbk1 PE=1 SV=1	GO:0004672(protein kinase activity);GO:0004674(protein serine/threonine kinase activity);GO:0005524(ATP binding);GO:0005575(cellular_component);GO:0006468(protein phosphorylation);GO:0007498(mesoderm development);GO:0018105(peptidyl-serine phosphorylation);GO:0018107(peptidyl-threonine phosphorylation)	ENOG41112JR(SH3-binding domain kinase)	NA	NA	NA	-	E2B6Q3.1 PF00069.23;Pkinase;	-	660.64	551.34	650.86	886.74	1319.25	1142.37	10.26	8.16	11.22	16.1	25.66	23.45	9.88	21.74	-1.13672	down	0.000367669	0.0306234	yes
TRINITY_DN25119_c0_g1	587	TRINITY_DN25119_c0_g1_i1	Uncharacterized protein CELE_C23H5.8 [Caenorhabditis elegans]	-	-	-	ENOG4110I9R(NA)	-	-	-	-	-	-	46	43.37	35	1	0	0	16.33	13.72	11.97	0.42	0	0	14.01	0.14	6.24615	up	0.000373183	0.0309249	yes
TRINITY_DN17174_c1_g1	416	TRINITY_DN17174_c1_g1_i1	-	-	-	-	-	-	-	-	-	-	-	18.51	34.35	25.73	0	0	0	11.67	21.18	16.38	0	0	0	16.41	0	7.58562	up	0.000381866	0.0314847	yes
TRINITY_DN2022_c0_g1	8594	TRINITY_DN2022_c0_g1_i1;TRINITY_DN2022_c0_g1_i2	PREDICTED: sortilin-related receptor-like isoform X1 [Megachile rotundata]	SORL1	Sortilin-related receptor OS=Oryctolagus cuniculus GN=SORL1 PE=2 SV=1	GO:0001540(amyloid-beta binding);GO:0005615(extracellular space);GO:0005641(nuclear envelope lumen);GO:0005769(early endosome);GO:0005783(endoplasmic reticulum);GO:0005802(trans-Golgi network);GO:0006622(protein targeting to lysosome);GO:0006892(post-Golgi vesicle-mediated transport);GO:0014910(regulation of smooth muscle cell migration);GO:0016021(integral component of membrane);GO:0030169(low-d…	ENOG410Y3W5(Functions as a sorting receptor in the Golgi compartment required for the intracellular sorting and delivery of soluble vacuolar proteins, like carboxypeptidase Y (CPY) and proteinase A. Executes multiple rounds of sorting by cycling between the late Golgi and a prevacuolar endosome-like compartment)	K12388	sortilin	-	nfu04142(Lysosome)	E2C949.1 PF15902.3;Sortilin-Vps10;	-	4352.63	3779.94	3555.67	4568.53	6767.51	9721.31	35.84	29.05	30.8	46.12	70.9	106.84	31.9	74.62	-1.15851	down	0.000388467	0.031868	yes
TRINITY_DN1050_c0_g2	659	TRINITY_DN1050_c0_g2_i1	cytochrome c oxidase subunit II (mitochondrion) [Rattus lutreolus]	Mtco2	Cytochrome c oxidase subunit 2 OS=Mus musculus GN=Mtco2 PE=1 SV=1	GO:0004129(cytochrome-c oxidase activity);GO:0005507(copper ion binding);GO:0005739(mitochondrion);GO:0005743(mitochondrial inner membrane);GO:0005751(mitochondrial respiratory chain complex IV);GO:0016020(membrane);GO:0016021(integral component of membrane);GO:0016491(oxidoreductase activity);GO:0022900(electron transport chain);GO:0042773(ATP synthesis coupled electron transport);GO:0045277(res…	COG1622(Subunits I and II form the functional core of the enzyme complex. Electrons originating in cytochrome c are transferred via heme a and Cu(A) to the binuclear center formed by heme a3 and Cu(B) (By similarity))	K02261	cytochrome c oxidase subunit 2	-	mmu00190(Oxidative phosphorylation);mmu04260(Cardiac muscle contraction);mmu04714(Thermogenesis);mmu05010(Alzheimer disease);mmu05012(Parkinson disease);mmu05016(Huntington disease);mmu04932(Non-alcoholic fatty liver disease (NAFLD))	Q8WBA9.1 PF00116.18;COX2;	-	3214	1414.76	1224.09	217	3	1	873.7	337.23	320.14	68.55	0.75	0.26	510.36	23.19	4.43785	up	0.000392838	0.0319831	yes
TRINITY_DN1388_c0_g1	7501	TRINITY_DN1388_c0_g1_i1;TRINITY_DN1388_c0_g1_i2;TRINITY_DN1388_c0_g1_i3;TRINITY_DN1388_c0_g1_i4;TRINITY_DN1388_c0_g1_i5;TRINITY_DN1388_c0_g1_i6;TRINITY_DN1388_c0_g1_i7;TRINITY_DN1388_c0_g1_i8	Fasciclin-2 [Dufourea novaeangliae]	Fas2	Fasciclin-2 OS=Drosophila melanogaster GN=Fas2 PE=1 SV=1	GO:0001746(Bolwig's organ morphogenesis);GO:0005515(protein binding);GO:0005737(cytoplasm);GO:0005829(cytosol);GO:0005886(plasma membrane);GO:0007156(homophilic cell adhesion via plasma membrane adhesion molecules);GO:0007413(axonal fasciculation);GO:0007528(neuromuscular junction development);GO:0007611(learning or memory);GO:0007612(learning);GO:0007614(short-term memory);GO:0008038(neuron reco…	ENOG410XTGB(Neural cell adhesion molecule 1)	NA	NA	NA	-	A0A088A4Z4.1 PF07679.14;I-set;	-	1020.68	998.41	1017.98	992.84	2429.85	2814.92	15.88	14.93	17.55	22.58	77.55	117.79	16.12	72.64	-1.34141	down	0.000393789	0.0319831	yes
TRINITY_DN3954_c0_g3	6357	TRINITY_DN3954_c0_g3_i1;TRINITY_DN3954_c0_g3_i2;TRINITY_DN3954_c0_g3_i3	PREDICTED: facilitated trehalose transporter Tret1-like isoform X2 [Megachile rotundata]	Tret1	Facilitated trehalose transporter Tret1 OS=Polypedilum vanderplanki GN=Tret1 PE=1 SV=1	GO:0005351(carbohydrate:proton symporter activity);GO:0005355(glucose transmembrane transporter activity);GO:0005887(integral component of plasma membrane);GO:0046323(glucose import)	ENOG410XNQK(Transporter)	NA	NA	NA	-	A0A087ZYT1.1 PF00083.22;Sugar_tr;	-	3627.72	2618.34	1851.34	3047.18	5490.73	8524.12	38.54	25.81	20.26	37.55	76.18	130.44	28.2	81.39	-1.39277	down	0.000400651	0.0323794	yes
TRINITY_DN21_c1_g3	7532	TRINITY_DN21_c1_g3_i1;TRINITY_DN21_c1_g3_i2;TRINITY_DN21_c1_g3_i3	PREDICTED: low-density lipoprotein receptor-related protein 2 [Megachile rotundata]	Lrp2	Low-density lipoprotein receptor-related protein 2 OS=Rattus norvegicus GN=Lrp2 PE=1 SV=1	GO:0005509(calcium ion binding);GO:0005829(cytosol);GO:0005886(plasma membrane);GO:0016324(apical plasma membrane);GO:0030100(regulation of endocytosis);GO:0040003(chitin-based cuticle development);GO:0048082(regulation of adult chitin-containing cuticle pigmentation)	ENOG410XP34(beta-amyloid clearance)	NA	NA	NA	-	F7F4J4.1 PF16472.3;DUF5050;	-	860.26	628.26	873.96	922.25	1677.98	1981.7	7.76	5.28	8.22	9.44	19.42	25.41	7.09	18.09	-1.25497	down	0.000416373	0.0334842	yes
TRINITY_DN24922_c0_g1	370	TRINITY_DN24922_c0_g1_i1	PDZ and LIM domain protein Zasp [Eufriesea mexicana]	-	-	-	ENOG410XRD4(PDZ and LIM domain)	NA	NA	NA	-	-	-	0	0	1.45	3.45	84.94	127.4	0	0	1.06	3.12	65.34	105.17	0.35	57.88	-7.55428	down	0.000422354	0.033637	yes
TRINITY_DN3856_c0_g1	6818	TRINITY_DN3856_c0_g1_i1;TRINITY_DN3856_c0_g1_i2;TRINITY_DN3856_c0_g1_i3;TRINITY_DN3856_c0_g1_i4	PREDICTED: multiple epidermal growth factor-like domains protein 10 [Megachile rotundata]	-	-	-	ENOG410XQWV(multiple EGF-like-domains)	-	-	-	-	A0A088AGA0.1 PF07546.11;EMI;	-	6600.27	7242.94	6618.8	8045.15	11566.4	17927.8	67.16	68.4	69.39	94.94	150.17	255.03	68.32	166.71	-1.18632	down	0.000424481	0.033637	yes
TRINITY_DN695_c1_g1	4482	TRINITY_DN695_c1_g1_i1;TRINITY_DN695_c1_g1_i2;TRINITY_DN695_c1_g1_i4;TRINITY_DN695_c1_g1_i5;TRINITY_DN695_c1_g1_i6;TRINITY_DN695_c1_g1_i7;TRINITY_DN695_c1_g1_i8	transcriptional activator protein Pur-beta isoform X4 [Ceratina calcarata]	purb	Transcriptional activator protein Pur-beta OS=Danio rerio GN=purb PE=2 SV=3	GO:0000977(RNA polymerase II regulatory region sequence-specific DNA binding);GO:0001227(transcriptional repressor activity, RNA polymerase II transcription regulatory region sequence-specific DNA binding);GO:0003677(DNA binding);GO:0003690(double-stranded DNA binding);GO:0003723(RNA binding);GO:0003729(mRNA binding);GO:0005634(nucleus);GO:0005737(cytoplasm);GO:0031935(regulation of chromatin sil…	ENOG410Y21P(NA)	NA	NA	NA	-	K7INI5.1 PF04845.11;PurA;	Others	1852.2	1655.67	1778.41	1985.4	3323.1	4652.95	91.78	75.74	89.59	113.08	200.89	316.86	85.7	210.28	-1.22104	down	0.000424768	0.033637	yes
TRINITY_DN2180_c0_g2	9607	TRINITY_DN2180_c0_g2_i1;TRINITY_DN2180_c0_g2_i2;TRINITY_DN2180_c0_g2_i3;TRINITY_DN2180_c0_g2_i4;TRINITY_DN2180_c0_g2_i5	PREDICTED: probable cation-transporting ATPase 13A3 isoform X1 [Megachile rotundata]	ATP13A3	Probable cation-transporting ATPase 13A3 OS=Homo sapiens GN=ATP13A3 PE=1 SV=4	GO:0000166(nucleotide binding);GO:0005388(calcium-transporting ATPase activity);GO:0005887(integral component of plasma membrane);GO:0006812(cation transport);GO:0006874(cellular calcium ion homeostasis);GO:0019829(cation-transporting ATPase activity);GO:0043231(intracellular membrane-bounded organelle)	ENOG410XRCA(ATPase (type)	NA	NA	NA	-	A0A088AMF7.1 PF00122.18;E1-E2_ATPase;	-	3095.72	2752.11	3001.62	3302.52	5444.76	7557.28	28.49	25.37	28.99	34.19	60.73	97.62	27.62	64.18	-1.18796	down	0.000426515	0.033637	yes
TRINITY_DN1621_c0_g1	10810	TRINITY_DN1621_c0_g1_i1;TRINITY_DN1621_c0_g1_i2;TRINITY_DN1621_c0_g1_i3;TRINITY_DN1621_c0_g1_i4;TRINITY_DN1621_c0_g1_i5;TRINITY_DN1621_c0_g1_i6	PREDICTED: protein slit isoform X3 [Polistes dominula]	sli	Protein slit OS=Drosophila melanogaster GN=sli PE=1 SV=2	GO:0001764(neuron migration);GO:0003151(outflow tract morphogenesis);GO:0005509(calcium ion binding);GO:0005576(extracellular region);GO:0005615(extracellular space);GO:0007409(axonogenesis);GO:0007411(axon guidance);GO:0007427(epithelial cell migration, open tracheal system);GO:0007432(salivary gland boundary specification);GO:0007502(digestive tract mesoderm development);GO:0007509(mesoderm mig…	COG4886(leucine Rich Repeat)	NA	NA	NA	-	E2B242.1 PF00054.21;Laminin_G_1;	-	405.56	382.11	410.53	441.36	913.28	1493.02	2.71	2.4	2.9	3.46	7.64	13.19	2.67	8.1	-1.5598	down	0.000436649	0.0341317	yes
TRINITY_DN7007_c0_g1	6682	TRINITY_DN7007_c0_g1_i1;TRINITY_DN7007_c0_g1_i10;TRINITY_DN7007_c0_g1_i11;TRINITY_DN7007_c0_g1_i12;TRINITY_DN7007_c0_g1_i13;TRINITY_DN7007_c0_g1_i14;TRINITY_DN7007_c0_g1_i15;TRINITY_DN7007_c0_g1_i16;TRINITY_DN7007_c0_g1_i17;TRINITY_DN7007_c0_g1_i18;TRINITY_DN7007_c0_g1_i19;TRINITY_DN7007_c0_g1_i2;TRINITY_DN7007_c0_g1_i20;TRINITY_DN7007_c0_g1_i21;TRINITY_DN7007_c0_g1_i22;TRINITY_DN7007_c0_g1_i23;T…	PREDICTED: uncharacterized protein LOC100878328 isoform X1 [Megachile rotundata]	-	-	GO:0003674(molecular_function);GO:0005575(cellular_component);GO:0008150(biological_process)	ENOG411200J(NA)	-	-	-	-	-	-	813.37	752.22	838.32	1163	1520	1372.01	8.58	7.28	9.12	14.4	20.6	20.38	8.33	18.46	-1.04704	down	0.000437938	0.0341317	yes
TRINITY_DN224_c0_g1	8833	TRINITY_DN224_c0_g1_i1;TRINITY_DN224_c0_g1_i10;TRINITY_DN224_c0_g1_i11;TRINITY_DN224_c0_g1_i12;TRINITY_DN224_c0_g1_i13;TRINITY_DN224_c0_g1_i14;TRINITY_DN224_c0_g1_i15;TRINITY_DN224_c0_g1_i16;TRINITY_DN224_c0_g1_i17;TRINITY_DN224_c0_g1_i18;TRINITY_DN224_c0_g1_i19;TRINITY_DN224_c0_g1_i2;TRINITY_DN224_c0_g1_i20;TRINITY_DN224_c0_g1_i21;TRINITY_DN224_c0_g1_i22;TRINITY_DN224_c0_g1_i23;TRINITY_DN224_c0_…	PREDICTED: kinesin-like protein unc-104 isoform X11 [Megachile rotundata]	unc-104	Kinesin-like protein unc-104 OS=Aedes aegypti GN=unc-104 PE=3 SV=1	GO:0005875(microtubule associated complex);GO:0047496(vesicle transport along microtubule);GO:0048489(synaptic vesicle transport)	COG5059(Kinesin family member)	NA	NA	NA	-	F4WBT9.1 PF00225.21;Kinesin;	-	2171.56	1579.14	1789.58	2418.98	3662.48	3290.09	23.74	13.04	20.73	30.1	49.27	61.05	19.17	46.81	-1.05168	down	0.000439573	0.0341317	yes
TRINITY_DN339_c0_g2	6172	TRINITY_DN339_c0_g2_i1;TRINITY_DN339_c0_g2_i10;TRINITY_DN339_c0_g2_i2;TRINITY_DN339_c0_g2_i3;TRINITY_DN339_c0_g2_i4;TRINITY_DN339_c0_g2_i5;TRINITY_DN339_c0_g2_i6;TRINITY_DN339_c0_g2_i7;TRINITY_DN339_c0_g2_i8;TRINITY_DN339_c0_g2_i9	PREDICTED: uncharacterized protein LOC100880783 isoform X1 [Megachile rotundata]	-	-	GO:0001745(compound eye morphogenesis);GO:0005515(protein binding);GO:0005635(nuclear envelope);GO:0005640(nuclear outer membrane);GO:0005737(cytoplasm);GO:0005811(lipid droplet);GO:0005881(cytoplasmic microtubule);GO:0006869(lipid transport);GO:0006997(nucleus organization);GO:0007097(nuclear migration);GO:0007523(larval visceral muscle development);GO:0016021(integral component of membrane);GO:…	ENOG4111Q0W(NA)	-	-	-	-	K7JF83.1 PF10541.7;KASH;	-	985.08	797.31	1122.01	1181.78	1874.45	2298.37	17.95	13.72	21	29.1	48.06	62.12	17.56	46.43	-1.18128	down	0.00044115	0.0341317	yes
TRINITY_DN416_c1_g2	4222	TRINITY_DN416_c1_g2_i1;TRINITY_DN416_c1_g2_i10;TRINITY_DN416_c1_g2_i11;TRINITY_DN416_c1_g2_i12;TRINITY_DN416_c1_g2_i2;TRINITY_DN416_c1_g2_i3;TRINITY_DN416_c1_g2_i4;TRINITY_DN416_c1_g2_i5;TRINITY_DN416_c1_g2_i6;TRINITY_DN416_c1_g2_i7;TRINITY_DN416_c1_g2_i8;TRINITY_DN416_c1_g2_i9	PREDICTED: semaphorin-5A [Megachile rotundata]	SEMA5B	Semaphorin-5B OS=Homo sapiens GN=SEMA5B PE=2 SV=4	GO:0001755(neural crest cell migration);GO:0016021(integral component of membrane);GO:0030215(semaphorin receptor binding);GO:0030335(positive regulation of cell migration);GO:0045499(chemorepellent activity);GO:0048843(negative regulation of axon extension involved in axon guidance);GO:0071526(semaphorin-plexin signaling pathway)	ENOG410XQZC(Sema domain, immunoglobulin domain (Ig), transmembrane domain (TM) and short cytoplasmic domain, (Semaphorin))	K06841	semaphorin 5	-	mcc04360(Axon guidance)	A0A088AFH5.1 PF01403.17;Sema;	-	1274.05	1398.21	1593.34	1792.9	2397.13	3422.16	22.54	22.98	29.07	36.83	53.69	84.13	24.86	58.22	-1.13996	down	0.000467534	0.0358555	yes
TRINITY_DN28009_c0_g1	642	TRINITY_DN28009_c0_g1_i1	troponin C, cardiac/slow skeletal, partial [Mus musculus]	TNNC1	Troponin C, slow skeletal and cardiac muscles OS=Bos taurus GN=TNNC1 PE=1 SV=1	GO:0005509(calcium ion binding);GO:0005654(nucleoplasm);GO:0005739(mitochondrion);GO:0005861(troponin complex);GO:0014883(transition between fast and slow fiber);GO:0031013(troponin I binding);GO:0031014(troponin T binding);GO:0032972(regulation of muscle filament sliding speed);GO:0042803(protein homodimerization activity);GO:0043462(regulation of ATPase activity);GO:0048306(calcium-dependent pr…	COG5126(Calcium-binding protein)	K05865	troponin C, slow skeletal and cardiac muscles	-	mcc04020(Calcium signaling pathway);mcc04260(Cardiac muscle contraction);mcc04261(Adrenergic signaling in cardiomyocytes);mcc05410(Hypertrophic cardiomyopathy (HCM));mcc05414(Dilated cardiomyopathy (DCM))	H2M7W2.1 PF13833.4;EF-hand_8;	-	138.04	54	65	3	0	0	39.88	13.71	18.06	1.01	0	0	23.88	0.34	5.97939	up	0.000469496	0.0358555	yes
TRINITY_DN2649_c0_g2	9478	TRINITY_DN2649_c0_g2_i10;TRINITY_DN2649_c0_g2_i11;TRINITY_DN2649_c0_g2_i2;TRINITY_DN2649_c0_g2_i3;TRINITY_DN2649_c0_g2_i5;TRINITY_DN2649_c0_g2_i7;TRINITY_DN2649_c0_g2_i8	PREDICTED: junctophilin-1 isoform X1 [Megachile rotundata]	JPH1	Junctophilin-1 OS=Oryctolagus cuniculus GN=JPH1 PE=2 SV=1	GO:0003674(molecular_function);GO:0008150(biological_process);GO:0015278(calcium-release channel activity);GO:0030314(junctional membrane complex)	COG4642(whole genome shotgun sequence)	NA	NA	NA	-	-	-	6508.19	4879.67	6639.06	8500.2	10396.7	10560.5	57.02	40.01	59.22	82.81	109.81	117.1	52.08	103.24	-1.00168	down	0.00047002	0.0358555	yes
TRINITY_DN27089_c0_g1	1434	TRINITY_DN27089_c0_g1_i1	Fructose-2,6-bisphosphatase [Caenorhabditis elegans]	pfkb-1.2	6-phosphofructo-2-kinase/fructose-2,6-bisphosphatase OS=Caenorhabditis elegans GN=pfkb-1.2 PE=3 SV=2	GO:0000166(nucleotide binding);GO:0003824(catalytic activity);GO:0003873(6-phosphofructo-2-kinase activity);GO:0004331(fructose-2,6-bisphosphate 2-phosphatase activity);GO:0005524(ATP binding);GO:0006000(fructose metabolic process);GO:0006003(fructose 2,6-bisphosphate metabolic process);GO:0008152(metabolic process);GO:0016301(kinase activity);GO:0016310(phosphorylation);GO:0016311(dephosphorylat…	COG0406(Phosphoglycerate mutase)	K01103	6-phosphofructo-2-kinase / fructose-2,6-biphosphatase 3	EC:2.7.1.105 3.1.3.46	nai00051(Fructose and mannose metabolism)	A8X920.1 PF01591.16;6PF2K;	-	34	48	32	1	0	0	2.14	2.75	2.04	0.07	0	0	2.31	0.02	6.12372	up	0.000476665	0.036067	yes
TRINITY_DN11296_c0_g1	3141	TRINITY_DN11296_c0_g1_i1;TRINITY_DN11296_c0_g1_i2;TRINITY_DN11296_c0_g1_i3	PREDICTED: acyl-CoA synthetase family member 2, mitochondrial [Megachile rotundata]	Acsf2	Acyl-CoA synthetase family member 2, mitochondrial OS=Mus musculus GN=Acsf2 PE=1 SV=1	GO:0003824(catalytic activity);GO:0005777(peroxisome);GO:0008152(metabolic process)	COG0318(Amp-dependent synthetase and ligase)	NA	NA	NA	-	A0A087ZYX4.1 PF00501.26;AMP-binding;	-	3335.09	3189.65	2624.14	3438.28	5802.69	6794.78	89.94	83.31	72.78	93.29	171.2	216.4	82.01	160.3	-1.11497	down	0.000477211	0.036067	yes
TRINITY_DN900_c0_g1	3438	TRINITY_DN900_c0_g1_i1;TRINITY_DN900_c0_g1_i2;TRINITY_DN900_c0_g1_i3	PREDICTED: mediator of RNA polymerase II transcription subunit 15 [Megachile rotundata]	-	-	GO:0003674(molecular_function);GO:0008150(biological_process);GO:0016021(integral component of membrane)	ENOG4111VHA(NA)	-	-	-	-	-	-	12061.8	10415	10244.4	11858.8	19790.8	33358.3	250.92	200.32	218.77	286.09	516.95	952.49	223.34	585.18	-1.30466	down	0.00048157	0.0362251	yes
TRINITY_DN143_c0_g1	10902	TRINITY_DN143_c0_g1_i1;TRINITY_DN143_c0_g1_i10;TRINITY_DN143_c0_g1_i11;TRINITY_DN143_c0_g1_i12;TRINITY_DN143_c0_g1_i13;TRINITY_DN143_c0_g1_i14;TRINITY_DN143_c0_g1_i15;TRINITY_DN143_c0_g1_i16;TRINITY_DN143_c0_g1_i17;TRINITY_DN143_c0_g1_i18;TRINITY_DN143_c0_g1_i19;TRINITY_DN143_c0_g1_i2;TRINITY_DN143_c0_g1_i20;TRINITY_DN143_c0_g1_i21;TRINITY_DN143_c0_g1_i22;TRINITY_DN143_c0_g1_i23;TRINITY_DN143_c0_…	PREDICTED: spectrin beta chain isoform X3 [Megachile rotundata]	beta-Spec	Spectrin beta chain OS=Drosophila melanogaster GN=beta-Spec PE=1 SV=2	GO:0003779(actin binding);GO:0005200(structural constituent of cytoskeleton);GO:0005546(phosphatidylinositol-4,5-bisphosphate binding);GO:0005886(plasma membrane);GO:0007009(plasma membrane organization);GO:0007026(negative regulation of microtubule depolymerization);GO:0007274(neuromuscular synaptic transmission);GO:0007399(nervous system development);GO:0007409(axonogenesis);GO:0007411(axon gui…	COG5069(Microtubule associated monoxygenase, calponin and LIM domain containing)	NA	NA	NA	-	A0A088ANZ7.1 PF15410.4;PH_9;	-	8297.17	7481.96	8733.07	8942.58	15115	23009.2	63.17	55.14	72.63	78.57	140.87	235.54	63.65	151.66	-1.24947	down	0.000483741	0.0362251	yes
TRINITY_DN1304_c0_g3	3511	TRINITY_DN1304_c0_g3_i1	PREDICTED: serine/threonine-protein kinase 17B-like [Megachile rotundata]	STK17A	Serine/threonine-protein kinase 17A OS=Oryctolagus cuniculus GN=STK17A PE=2 SV=1	GO:0004674(protein serine/threonine kinase activity);GO:0005524(ATP binding);GO:0005634(nucleus)	ENOG410XRMJ(calcium-dependent protein kinase)	NA	NA	NA	-	K7J0Z3.1 PF00069.23;Pkinase;	-	1321.67	1139.37	1208.96	1545.35	2029.46	3036.08	26.84	21.39	25.21	36.39	51.78	84.68	24.48	57.62	-1.15673	down	0.000494641	0.0368722	yes
TRINITY_DN14688_c0_g1	1413	TRINITY_DN14688_c0_g1_i1	Heat Shock Protein [Caenorhabditis elegans]	Trap1	Heat shock protein 75 kDa, mitochondrial OS=Mus musculus GN=Trap1 PE=1 SV=1	GO:0005524(ATP binding);GO:0006457(protein folding);GO:0006950(response to stress);GO:0051082(unfolded protein binding)	COG0326(Molecular chaperone. Has ATPase activity (By similarity))	NA	NA	NA	-	G0MG95.1 PF00183.16;HSP90;	-	42.85	29	40.59	1	0	0	2.76	1.7	2.64	0.07	0	0	2.37	0.02	6.11926	up	0.000498854	0.0370172	yes
TRINITY_DN2867_c0_g1	6449	TRINITY_DN2867_c0_g1_i1;TRINITY_DN2867_c0_g1_i10;TRINITY_DN2867_c0_g1_i11;TRINITY_DN2867_c0_g1_i12;TRINITY_DN2867_c0_g1_i13;TRINITY_DN2867_c0_g1_i14;TRINITY_DN2867_c0_g1_i15;TRINITY_DN2867_c0_g1_i17;TRINITY_DN2867_c0_g1_i18;TRINITY_DN2867_c0_g1_i2;TRINITY_DN2867_c0_g1_i3;TRINITY_DN2867_c0_g1_i4;TRINITY_DN2867_c0_g1_i5;TRINITY_DN2867_c0_g1_i6;TRINITY_DN2867_c0_g1_i7;TRINITY_DN2867_c0_g1_i8	PREDICTED: fibrillin-2 isoform X1 [Megachile rotundata]	FBLN2	Fibulin-2 OS=Homo sapiens GN=FBLN2 PE=1 SV=2	GO:0005509(calcium ion binding)	ENOG410Y194(Fibulin 2)	NA	NA	NA	-	A0A088AGT8.1 PF07645.13;EGF_CA;	-	3518.31	2819.93	2647.96	3293.53	5408.01	8693.11	58.36	44	46.51	64.44	113.16	197.68	49.62	125.09	-1.26662	down	0.000507714	0.0374707	yes
TRINITY_DN2028_c0_g1	9621	TRINITY_DN2028_c0_g1_i1;TRINITY_DN2028_c0_g1_i10;TRINITY_DN2028_c0_g1_i100;TRINITY_DN2028_c0_g1_i101;TRINITY_DN2028_c0_g1_i102;TRINITY_DN2028_c0_g1_i103;TRINITY_DN2028_c0_g1_i104;TRINITY_DN2028_c0_g1_i105;TRINITY_DN2028_c0_g1_i106;TRINITY_DN2028_c0_g1_i107;TRINITY_DN2028_c0_g1_i108;TRINITY_DN2028_c0_g1_i109;TRINITY_DN2028_c0_g1_i11;TRINITY_DN2028_c0_g1_i110;TRINITY_DN2028_c0_g1_i111;TRINITY_DN202…	FERM, ARHGEF and pleckstrin domain-containing protein 1 isoform X1 [Bombus impatiens]	Farp1	FERM, RhoGEF and pleckstrin domain-containing protein 1 OS=Rattus norvegicus GN=Farp1 PE=1 SV=2	GO:0005089(Rho guanyl-nucleotide exchange factor activity);GO:0005856(cytoskeleton);GO:0008092(cytoskeletal protein binding);GO:0035023(regulation of Rho protein signal transduction)	ENOG410XP7Q(and pleckstrin domain protein)	K06082	FERM, RhoGEF and pleckstrin domain protein 2	-	srx04520(Adherens junction)	F4WQV8.1 PF00621.18;RhoGEF;	-	51553.4	60143.9	42985.7	30272.1	135431	381268	402.46	429.58	345.58	274.55	1348.68	4164.65	392.54	1929.29	-2.15961	down	0.000509556	0.0374707	yes
TRINITY_DN2192_c0_g1	14692	TRINITY_DN2192_c0_g1_i1;TRINITY_DN2192_c0_g1_i2;TRINITY_DN2192_c0_g1_i3;TRINITY_DN2192_c0_g1_i4;TRINITY_DN2192_c0_g1_i5;TRINITY_DN2192_c0_g1_i6	PREDICTED: uncharacterized protein LOC100880818 isoform X1 [Megachile rotundata]	-	Vitellogenin OS=Fenneropenaeus merguiensis PE=1 SV=2	GO:0005319(lipid transporter activity);GO:0005615(extracellular space);GO:0005886(plasma membrane);GO:0015918(sterol transport);GO:0032370(positive regulation of lipid transport);GO:0034196(acylglycerol transport);GO:0045178(basal part of cell);GO:0070325(lipoprotein particle receptor binding)	ENOG410XR10(Domain of Unknown Function (DUF1081))	NA	NA	NA	-	A0A088AUT9.1 PF01347.20;Vitellogenin_N;	-	4693.51	4361.82	4193.56	5134.63	7448.72	10436.4	20.57	17.76	18.98	26.12	42.02	64.54	19.1	44.23	-1.10468	down	0.000523522	0.0383251	yes
TRINITY_DN26754_c0_g1	1200	TRINITY_DN26754_c0_g1_i1	eukaryotic translation initiation factor 3 subunit H [Ceratina calcarata]	-	Eukaryotic translation initiation factor 3 subunit H OS=Bombyx mori PE=2 SV=1	GO:0003743(translation initiation factor activity);GO:0005829(cytosol);GO:0005852(eukaryotic translation initiation factor 3 complex);GO:0006413(translational initiation);GO:0045747(positive regulation of Notch signaling pathway)	ENOG410XSR9(Component of the eukaryotic translation initiation factor 3 (eIF-3) complex, which is involved in protein synthesis and, together with other initiation factors, stimulates binding of mRNA and methionyl-tRNAi to the 40S ribosome (By similarity))	K03247	translation initiation factor 3 subunit H	-	aec03013(RNA transport)	A0A0J7NEK3.1 PF01398.19;JAB;	-	1862.77	1913.94	1771.02	971.39	636	423.38	153.85	142.94	146.97	92.92	60.41	43.45	147.92	65.59	1.1644	up	0.000529939	0.0386217	yes
TRINITY_DN25569_c0_g1	960	TRINITY_DN25569_c0_g1_i1	DumPY: shorter than wild-type [Caenorhabditis elegans]	-	-	GO:0042302(structural constituent of cuticle);GO:0042338(cuticle development involved in collagen and cuticulin-based cuticle molting cycle)	ENOG410ZT70(NA)	-	-	-	-	G0MC27.1 PF01484.15;Col_cuticle_N;	-	19	27	24	0	0	0	2.3	2.92	2.88	0	0	0	2.7	0	7.41377	up	0.0005426	0.03929	yes
TRINITY_DN1912_c0_g1	8048	TRINITY_DN1912_c0_g1_i1;TRINITY_DN1912_c0_g1_i10;TRINITY_DN1912_c0_g1_i11;TRINITY_DN1912_c0_g1_i12;TRINITY_DN1912_c0_g1_i13;TRINITY_DN1912_c0_g1_i14;TRINITY_DN1912_c0_g1_i15;TRINITY_DN1912_c0_g1_i16;TRINITY_DN1912_c0_g1_i17;TRINITY_DN1912_c0_g1_i19;TRINITY_DN1912_c0_g1_i2;TRINITY_DN1912_c0_g1_i21;TRINITY_DN1912_c0_g1_i22;TRINITY_DN1912_c0_g1_i24;TRINITY_DN1912_c0_g1_i25;TRINITY_DN1912_c0_g1_i3;TR…	PREDICTED: sodium/potassium-transporting ATPase subunit alpha isoform X1 [Megachile rotundata]	Atpalpha	Sodium/potassium-transporting ATPase subunit alpha OS=Drosophila melanogaster GN=Atpalpha PE=1 SV=3	GO:0005391(sodium:potassium-exchanging ATPase activity);GO:0005887(integral component of plasma membrane);GO:0006883(cellular sodium ion homeostasis);GO:0015991(ATP hydrolysis coupled proton transport);GO:0030007(cellular potassium ion homeostasis);GO:0036376(sodium ion export across plasma membrane);GO:0043231(intracellular membrane-bounded organelle)	COG0474(P-type atpase)	NA	NA	NA	-	T1IZN7.1 PF00702.24;Hydrolase;	-	12462.7	11132.6	11381.5	13035.4	21503.8	28149.8	119.39	101.55	116.2	150.18	263.03	398.46	112.38	270.56	-1.14743	down	0.000545172	0.03929	yes
TRINITY_DN4158_c0_g1	10478	TRINITY_DN4158_c0_g1_i10;TRINITY_DN4158_c0_g1_i2;TRINITY_DN4158_c0_g1_i3;TRINITY_DN4158_c0_g1_i4;TRINITY_DN4158_c0_g1_i5;TRINITY_DN4158_c0_g1_i6;TRINITY_DN4158_c0_g1_i7;TRINITY_DN4158_c0_g1_i9	PREDICTED: LOW QUALITY PROTEIN: uncharacterized protein LOC100881523 [Megachile rotundata]	-	-	GO:0000122(negative regulation of transcription by RNA polymerase II);GO:0000980(RNA polymerase II distal enhancer sequence-specific DNA binding);GO:0001158(enhancer sequence-specific DNA binding);GO:0003700(DNA binding transcription factor activity);GO:0005634(nucleus);GO:0007179(transforming growth factor beta receptor signaling pathway);GO:0007399(nervous system development);GO:0007432(salivar…	ENOG41125J6(Brinker DNA-binding domain)	-	-	-	-	A0A088AC99.1 PF09607.8;BrkDBD;	-	775.63	768.99	795.46	959.83	1465.13	1717.7	10.54	11.99	11.36	15.96	18.85	19.76	11.3	18.19	-1.12526	down	0.000551941	0.0395195	yes
TRINITY_DN27708_c0_g1	1686	TRINITY_DN27708_c0_g1_i1	ankyrin repeat domain-containing protein 1 [Mus musculus]	Ankrd1	Ankyrin repeat domain-containing protein 1 OS=Mus musculus GN=Ankrd1 PE=1 SV=1	GO:0000122(negative regulation of transcription by RNA polymerase II);GO:0001085(RNA polymerase II transcription factor binding);GO:0001650(fibrillar center);GO:0002039(p53 binding);GO:0003677(DNA binding);GO:0003712(transcription cofactor activity);GO:0003714(transcription corepressor activity);GO:0005515(protein binding);GO:0005634(nucleus);GO:0005667(transcription factor complex);GO:0005737(cy…	COG0666(Ankyrin Repeat)	NA	NA	NA	-	F7E5N8.2 PF12796.5;Ank_2;	-	398.07	116.99	102.99	10	0	0	19.98	5.37	5.25	0.58	0	0	10.2	0.19	5.61094	up	0.000554594	0.039536	yes
TRINITY_DN20827_c0_g2	5784	TRINITY_DN20827_c0_g2_i1;TRINITY_DN20827_c0_g2_i2	PREDICTED: brefeldin A-inhibited guanine nucleotide-exchange protein 1 [Megachile rotundata]	ARFGEF1	Brefeldin A-inhibited guanine nucleotide-exchange protein 1 OS=Bos taurus GN=ARFGEF1 PE=1 SV=1	GO:0005086(ARF guanyl-nucleotide exchange factor activity);GO:0005802(trans-Golgi network);GO:0016192(vesicle-mediated transport)	COG5307(and Sec7 domain)	K18442	brefeldin A-inhibited guanine nucleotide-exchange protein	-	bim04144(Endocytosis)	A0A087ZNZ3.1 PF16213.3;DCB;	-	1643.96	1441.98	1575.16	1886.33	2633.34	3660.05	24.01	21.91	23.03	33.24	42.91	59.48	22.98	45.21	-1.11681	down	0.000560997	0.0398186	yes
TRINITY_DN1959_c1_g1	7789	TRINITY_DN1959_c1_g1_i1;TRINITY_DN1959_c1_g1_i2;TRINITY_DN1959_c1_g1_i3	PREDICTED: AT-rich interactive domain-containing protein 5B-like isoform X2 [Megachile rotundata]	ARID5B	AT-rich interactive domain-containing protein 5B OS=Canis lupus familiaris GN=ARID5B PE=3 SV=1	GO:0000122(negative regulation of transcription by RNA polymerase II);GO:0000977(RNA polymerase II regulatory region sequence-specific DNA binding);GO:0001227(transcriptional repressor activity, RNA polymerase II transcription regulatory region sequence-specific DNA binding);GO:0001822(kidney development);GO:0003713(transcription coactivator activity);GO:0005634(nucleus);GO:0006807(nitrogen compo…	ENOG410YZVH(Lim domain binding)	K00844	hexokinase	EC:2.7.1.1	tng00010(Glycolysis / Gluconeogenesis);tng00051(Fructose and mannose metabolism);tng00052(Galactose metabolism);tng00500(Starch and sucrose metabolism);tng00520(Amino sugar and nucleotide sugar metabolism);tng00524(Neomycin, kanamycin and gentamicin biosynthesis);tng04910(Insulin signaling pathway)	W4WB78.1 PF01388.19;ARID;	ARID	659.04	621.15	648.15	831.08	1150.01	1595.11	5.6	4.92	5.7	8.22	12.48	19	5.41	13.23	-1.19685	down	0.000566916	0.0400645	yes
TRINITY_DN4448_c0_g2	526	TRINITY_DN4448_c0_g2_i1	-	-	-	-	-	-	-	-	-	-	-	2541.85	1891.44	3155.55	2509.41	5654.7	8027.76	1135.77	774.42	1376.41	1341.05	2145.1	3227.2	1095.53	2237.78	-1.39591	down	0.000582784	0.0408508	yes
TRINITY_DN6823_c0_g2	1460	TRINITY_DN6823_c0_g2_i1	myomesin-2 [Mus musculus]	MYOM2	Myomesin-2 OS=Homo sapiens GN=MYOM2 PE=1 SV=2	GO:0002074(extraocular skeletal muscle development);GO:0005739(mitochondrion);GO:0005859(muscle myosin complex);GO:0005865(striated muscle thin filament);GO:0006936(muscle contraction);GO:0006941(striated muscle contraction);GO:0007015(actin filament organization);GO:0008307(structural constituent of muscle);GO:0019900(kinase binding);GO:0030018(Z disc);GO:0030240(skeletal muscle thin filament as…	ENOG410ZSRR(myomesin)	NA	NA	NA	-	F7AS17.1 PF07679.14;I-set;	-	67	32.22	23.14	1	0	0	4.11	1.8	1.44	0.07	0	0	2.45	0.02	6.21886	up	0.00059287	0.0413198	yes
TRINITY_DN26125_c0_g1	562	TRINITY_DN26125_c0_g1_i1	Nucleolar protein 16 [Caenorhabditis elegans]	ZK265.6	Nucleolar protein 16 OS=Caenorhabditis elegans GN=ZK265.6 PE=3 SV=1	GO:0005634(nucleus);GO:0005730(nucleolus);GO:0042273(ribosomal large subunit biogenesis)	ENOG4111QB6(NOP16 nucleolar protein homolog (Yeast))	-	-	-	-	Q94402.1 PF09420.8;Nop16;	-	27.75	22	18	0	0	0	10.84	7.73	6.8	0	0	0	8.46	0	7.36876	up	0.000595364	0.0413198	yes
TRINITY_DN1599_c0_g1	5642	TRINITY_DN1599_c0_g1_i1	BTB/POZ domain-containing protein KCTD16 [Apis mellifera]	Kctd8	BTB/POZ domain-containing protein KCTD8 OS=Mus musculus GN=Kctd8 PE=1 SV=1	GO:0002121(inter-male aggressive behavior);GO:0005886(plasma membrane);GO:0008049(male courtship behavior);GO:0030431(sleep);GO:0051260(protein homooligomerization);GO:0090327(negative regulation of locomotion involved in locomotory behavior)	ENOG410Z155(potassium channel tetramerisation domain containing)	NA	NA	NA	-	F4WWQ4.1 PF02214.20;BTB_2;	-	522.03	495.35	436.13	633.69	1038.13	1066.02	6.25	5.5	5.38	8.8	15.82	17.79	5.71	14.14	-1.21412	down	0.000598321	0.0413198	yes
TRINITY_DN3544_c1_g1	3857	TRINITY_DN3544_c1_g1_i1;TRINITY_DN3544_c1_g1_i10;TRINITY_DN3544_c1_g1_i2;TRINITY_DN3544_c1_g1_i3;TRINITY_DN3544_c1_g1_i4;TRINITY_DN3544_c1_g1_i5;TRINITY_DN3544_c1_g1_i6;TRINITY_DN3544_c1_g1_i7;TRINITY_DN3544_c1_g1_i8;TRINITY_DN3544_c1_g1_i9	heterogeneous nuclear ribonucleoprotein K isoform X1 [Apis mellifera]	HNRNPK	Heterogeneous nuclear ribonucleoprotein K OS=Macaca fascicularis GN=HNRNPK PE=2 SV=1	GO:0000790(nuclear chromatin);GO:0000978(RNA polymerase II proximal promoter sequence-specific DNA binding);GO:0005925(focal adhesion);GO:0006366(transcription by RNA polymerase II);GO:0006396(RNA processing);GO:0010988(regulation of low-density lipoprotein particle clearance);GO:0016020(membrane);GO:0043066(negative regulation of apoptotic process);GO:0045716(positive regulation of low-density l…	ENOG4111GSB(heterogeneous nuclear ribonucleoprotein k)	K12886	heterogeneous nuclear ribonucleoprotein K	-	ame03040(Spliceosome)	F4WCX3.1 PF00858.22;ASC;	-	3458.81	2991.49	3064.53	3765.02	5359.3	7120.92	66.35	52.34	59.11	85.79	129.79	181.03	59.27	132.2	-1.07714	down	0.000599865	0.0413198	yes
TRINITY_DN15315_c0_g1	706	TRINITY_DN15315_c0_g1_i1	Cuticle collagen dpy-5 [Caenorhabditis elegans]	dpy-5	Cuticle collagen dpy-5 OS=Caenorhabditis elegans GN=dpy-5 PE=3 SV=1	GO:0005581(collagen trimer);GO:0040002(collagen and cuticulin-based cuticle development);GO:0040014(regulation of multicellular organism growth);GO:0040032(post-embryonic body morphogenesis);GO:0042302(structural constituent of cuticle);GO:0042329(structural constituent of collagen and cuticulin-based cuticle);GO:0042338(cuticle development involved in collagen and cuticulin-based cuticle molting…	ENOG410XNMM(collagen, type)	NA	NA	NA	-	A8XFU5.1 PF01484.15;Col_cuticle_N;	-	26	28	15	0	0	0	6.02	5.67	3.35	0	0	0	5.01	0	7.38527	up	0.000604219	0.0414449	yes
TRINITY_DN15765_c0_g1	1428	TRINITY_DN15765_c0_g1_i1;TRINITY_DN15765_c0_g1_i2	PREDICTED: major royal jelly protein 1 [Megachile rotundata]	-	-	GO:0005576(extracellular region);GO:0016853(isomerase activity);GO:0042438(melanin biosynthetic process);GO:0048067(cuticle pigmentation)	ENOG410XT7N(Major royal jelly protein)	-	-	-	-	A0A088ATY9.1 PF03022.14;MRJP;	-	22.66	1969.42	15	15	12	23	1.44	113.83	0.96	1.1	0.9	1.87	38.74	1.29	4.97336	up	0.000613522	0.0419069	yes
TRINITY_DN3533_c0_g2	1076	TRINITY_DN3533_c0_g2_i1	PREDICTED: actin-4-like [Rhagoletis zephyria]	act-2	Actin-2 OS=Caenorhabditis elegans GN=act-2 PE=3 SV=3	GO:0000166(nucleotide binding);GO:0000281(mitotic cytokinesis);GO:0005524(ATP binding);GO:0005737(cytoplasm);GO:0005856(cytoskeleton);GO:0005884(actin filament);GO:0005938(cell cortex);GO:0007111(meiosis II cytokinesis);GO:0009792(embryo development ending in birth or egg hatching);GO:0030866(cortical actin cytoskeleton organization);GO:0040011(locomotion)	COG5277(Actin-related protein)	K05692	actin beta/gamma 1	-	aga04391(Hippo signaling pathway -fly);aga04145(Phagosome);aga04745(Phototransduction - fly)	A0A0B2VWK9.1 PF00022.17;Actin;	-	9	67	21	0	0	0	0.89	5.95	2.07	0	0	0	2.97	0	7.86835	up	0.000617189	0.0419817	yes
TRINITY_DN1424_c0_g3	2167	TRINITY_DN1424_c0_g3_i1;TRINITY_DN1424_c0_g3_i2	PREDICTED: transcriptional coactivator YAP1 [Megachile rotundata]	yap1	Transcriptional coactivator YAP1 OS=Danio rerio GN=yap1 PE=2 SV=2	GO:0000902(cell morphogenesis);GO:0000979(RNA polymerase II core promoter sequence-specific DNA binding);GO:0001570(vasculogenesis);GO:0003143(embryonic heart tube morphogenesis);GO:0003682(chromatin binding);GO:0003713(transcription coactivator activity);GO:0003714(transcription corepressor activity);GO:0005515(protein binding);GO:0005634(nucleus);GO:0005654(nucleoplasm);GO:0005667(transcription…	COG5021(ubiquitin protein ligase)	K16687	transcriptional coactivator YAP1	-	ame04391(Hippo signaling pathway -fly);ame04392(Hippo signaling pathway - multiple species)	A0A0L7LBH0.1 PF15238.4;FAM181;	-	366	322.58	368.63	495.14	767.07	963.61	14.38	11.71	14.79	22.07	35.21	49.13	13.63	35.47	-1.3751	down	0.000631622	0.0423479	yes
TRINITY_DN895_c5_g1	802	TRINITY_DN895_c5_g1_i1	-	-	-	-	-	-	-	-	-	-	-	779.2	658.63	764.67	768.61	1539.15	2136.06	135.47	100.67	129.78	154.62	272.57	403.83	121.97	277.01	-1.31883	down	0.00063281	0.0423479	yes
TRINITY_DN6146_c0_g1	743	TRINITY_DN6146_c0_g1_i1	RNA polymerase-associated protein CTR9 [Caenorhabditis elegans]	ctr-9	RNA polymerase-associated protein CTR9 OS=Caenorhabditis elegans GN=ctr-9 PE=3 SV=3	GO:0000993(RNA polymerase II core binding);GO:0005634(nucleus);GO:0006355(regulation of transcription, DNA-templated);GO:0016593(Cdc73/Paf1 complex);GO:0051569(regulation of histone H3-K4 methylation)	COG0457(repeat-containing protein)	NA	NA	NA	-	-	-	16	21	31	0	0	0	3.3	3.78	6.19	0	0	0	4.42	0	7.38038	up	0.000633191	0.0423479	yes
TRINITY_DN6935_c0_g1	755	TRINITY_DN6935_c0_g1_i1;TRINITY_DN6935_c0_g1_i10;TRINITY_DN6935_c0_g1_i11;TRINITY_DN6935_c0_g1_i3;TRINITY_DN6935_c0_g1_i4;TRINITY_DN6935_c0_g1_i6;TRINITY_DN6935_c0_g1_i7;TRINITY_DN6935_c0_g1_i8;TRINITY_DN6935_c0_g1_i9	Ubc protein [Mus musculus]	UBB	Polyubiquitin-B OS=Bos taurus GN=UBB PE=1 SV=1	GO:0005634(nucleus);GO:0005704(polytene chromosome band);GO:0005737(cytoplasm);GO:0006464(cellular protein modification process);GO:0006511(ubiquitin-dependent protein catabolic process);GO:0016567(protein ubiquitination);GO:0019941(modification-dependent protein catabolic process);GO:0031386(protein tag);GO:0031625(ubiquitin protein ligase binding);GO:0070628(proteasome binding)	COG5272(ubiquitin)	-	-	-	-	A4HU11.2 PF00240.21;ubiquitin;	-	16	37	18	0	0	0	6.21	14.29	6.43	0	0	0	8.98	0	7.42615	up	0.00063422	0.0423479	yes
TRINITY_DN7631_c0_g1	5157	TRINITY_DN7631_c0_g1_i1;TRINITY_DN7631_c0_g1_i2;TRINITY_DN7631_c0_g1_i3	PREDICTED: WASH complex subunit FAM21 isoform X1 [Megachile rotundata]	FAM21A	WASH complex subunit FAM21A OS=Homo sapiens GN=FAM21A PE=1 SV=3	GO:0071203(WASH complex)	ENOG4110AMY(Family with sequence similarity 21, member)	K18462	WASH complex subunit FAM21	-	bter04144(Endocytosis)	A0A088AKJ5.1 PF15255.4;CAP-ZIP_m;	-	1107.98	1031.07	1079.95	1289.22	1860.18	2464.26	19.71	17.27	19.6	26.47	40.2	62.24	18.86	42.97	-1.10674	down	0.000635543	0.0423479	yes
TRINITY_DN908_c0_g1	8839	TRINITY_DN908_c0_g1_i1;TRINITY_DN908_c0_g1_i10;TRINITY_DN908_c0_g1_i11;TRINITY_DN908_c0_g1_i12;TRINITY_DN908_c0_g1_i13;TRINITY_DN908_c0_g1_i14;TRINITY_DN908_c0_g1_i15;TRINITY_DN908_c0_g1_i16;TRINITY_DN908_c0_g1_i17;TRINITY_DN908_c0_g1_i18;TRINITY_DN908_c0_g1_i19;TRINITY_DN908_c0_g1_i2;TRINITY_DN908_c0_g1_i20;TRINITY_DN908_c0_g1_i21;TRINITY_DN908_c0_g1_i22;TRINITY_DN908_c0_g1_i23;TRINITY_DN908_c0_…	PREDICTED: serine/threonine-protein kinase BCK1/SLK1/SSP31-like isoform X2 [Megachile rotundata]	Pkcdelta	Putative protein kinase C delta type homolog OS=Drosophila melanogaster GN=Pkcdelta PE=2 SV=3	GO:0004674(protein serine/threonine kinase activity);GO:0004697(protein kinase C activity);GO:0005524(ATP binding);GO:0005622(intracellular);GO:0005886(plasma membrane);GO:0006468(protein phosphorylation);GO:0018105(peptidyl-serine phosphorylation);GO:0035556(intracellular signal transduction)	ENOG410XNPH(protein serine/threonine kinase activity)	K06068	novel protein kinase C delta type	EC:2.7.11.13	bter04140(Autophagy - animal);bter04933(AGE-RAGE signaling pathway in diabetic complications)	A0A067RE88.1 PF00069.23;Pkinase;	-	4569.65	3437.53	5191.08	5518.56	7837.67	9083.39	63.39	46.96	73.66	84.91	128.25	163.69	61.34	125.62	-1.06152	down	0.000659937	0.043433	yes
TRINITY_DN979_c0_g1	7287	TRINITY_DN979_c0_g1_i1;TRINITY_DN979_c0_g1_i10;TRINITY_DN979_c0_g1_i11;TRINITY_DN979_c0_g1_i12;TRINITY_DN979_c0_g1_i13;TRINITY_DN979_c0_g1_i14;TRINITY_DN979_c0_g1_i2;TRINITY_DN979_c0_g1_i3;TRINITY_DN979_c0_g1_i4;TRINITY_DN979_c0_g1_i5;TRINITY_DN979_c0_g1_i6;TRINITY_DN979_c0_g1_i7;TRINITY_DN979_c0_g1_i8;TRINITY_DN979_c0_g1_i9	PREDICTED: protein FAM214A isoform X1 [Megachile rotundata]	fam214a	Protein FAM214A OS=Xenopus tropicalis GN=fam214a PE=2 SV=1	GO:0005515(protein binding)	ENOG41115V6(family with sequence similarity 214, member)	-	-	-	-	A0A088AA30.1 PF13889.4;Chromosome_seg;	-	2711.78	2544.54	2642.97	2953.79	4927.03	5500	31.9	26.75	31.28	40.38	68.97	82.1	29.98	63.82	-1.06061	down	0.000664204	0.043433	yes
TRINITY_DN1304_c0_g8	3037	TRINITY_DN1304_c0_g8_i1	-	-	-	-	-	-	-	-	-	-	-	515.67	380.93	475.06	603.47	1065.05	1003.29	12.39	8.45	11.7	16.81	31.97	32.9	10.85	27.23	-1.25482	down	0.000665507	0.043433	yes
TRINITY_DN13146_c1_g1	417	TRINITY_DN13146_c1_g1_i1	-	-	-	-	-	-	-	-	-	-	-	665.81	665.79	562.09	708.24	1397.73	1469.55	418.78	409.37	356.95	562.46	838.12	940.38	395.03	780.32	-1.21885	down	0.000668942	0.043433	yes
TRINITY_DN895_c0_g1	2634	TRINITY_DN895_c0_g1_i1;TRINITY_DN895_c0_g1_i2;TRINITY_DN895_c0_g1_i3	PREDICTED: phosphatidylinositol 3-kinase regulatory subunit alpha isoform X1 [Megachile rotundata]	GMIP	GEM-interacting protein OS=Homo sapiens GN=GMIP PE=1 SV=2	GO:0005942(phosphatidylinositol 3-kinase complex);GO:0008286(insulin receptor signaling pathway);GO:0043551(regulation of phosphatidylinositol 3-kinase activity);GO:0046854(phosphatidylinositol phosphorylation);GO:0046935(1-phosphatidylinositol-3-kinase regulator activity)	ENOG410XP6R(Phosphoinositide-3-kinase, regulatory subunit)	K02649	phosphoinositide-3-kinase regulatory subunit alpha/beta/delta	-	hst04068(FoxO signaling pathway);hst04070(Phosphatidylinositol signaling system);hst04150(mTOR signaling pathway);hst04140(Autophagy - animal);hst04213(Longevity regulating pathway - multiple species);hst04933(AGE-RAGE signaling pathway in diabetic complications)	A0A0J7NIY6.1 PF00620.25;RhoGAP;	-	422.29	332.54	532.78	582.91	928.83	1155.43	12.34	9.01	16.04	19.82	34.29	46.84	12.46	33.65	-1.34709	down	0.000670451	0.043433	yes
TRINITY_DN1908_c1_g3	4982	TRINITY_DN1908_c1_g3_i1;TRINITY_DN1908_c1_g3_i2	PREDICTED: uncharacterized protein LOC108551759 isoform X1 [Eufriesea mexicana]	-	-	GO:0005634(nucleus);GO:0006351(transcription, DNA-templated);GO:0006355(regulation of transcription, DNA-templated);GO:0007275(multicellular organism development);GO:0007424(open tracheal system development);GO:0007622(rhythmic behavior);GO:0007623(circadian rhythm);GO:0008407(chaeta morphogenesis);GO:0009987(cellular process);GO:0010259(multicellular organism aging);GO:0010906(regulation of gluc…	ENOG410Z28A(circadian rhythm)	K12114	vrille	-	bim04711(Circadian rhythm - fly)	A0A088A183.1 PF07716.13;bZIP_2;	TF_bZIP	1036.07	1084.23	1374.99	1504.71	1992.86	2586.15	14.24	13.85	19.47	24.06	34.83	49.59	15.85	36.16	-1.09948	down	0.000675782	0.0435635	yes
TRINITY_DN482_c0_g1	3831	TRINITY_DN482_c0_g1_i1;TRINITY_DN482_c0_g1_i2	-	-	-	-	-	-	-	-	-	-	-	407.2	365.38	350	511.51	913	836.05	7.49	6.22	6.61	10.91	21.15	21.18	6.77	17.75	-1.30678	down	0.000677802	0.0435635	yes
TRINITY_DN763_c4_g1	7051	TRINITY_DN763_c4_g1_i1;TRINITY_DN763_c4_g1_i2	forkhead box protein O [Bombus terrestris]	foxo	Forkhead box protein O OS=Drosophila virilis GN=foxo PE=3 SV=1	GO:0000981(RNA polymerase II transcription factor activity, sequence-specific DNA binding);GO:0005634(nucleus)	COG5025(forkhead box)	K09408	forkhead box protein O3	-	bter04068(FoxO signaling pathway);bter04137(Mitophagy - animal);bter04213(Longevity regulating pathway - multiple species)	A0A088AA82.1 PF00250.16;Forkhead;	Fork_head	2346.54	1736.75	2034.86	2605.26	3578.45	3863.83	22.17	15.24	19.82	28.56	43.13	51.11	19.08	40.93	-1.01326	down	0.000680856	0.0435881	yes
TRINITY_DN17634_c0_g5	1661	TRINITY_DN17634_c0_g5_i1;TRINITY_DN17634_c0_g5_i2	Replicase polyprotein 1a, partial [Melipona quadrifasciata]	-	-	-	ENOG4112CU5(NA)	K07200	5'-AMP-activated protein kinase, regulatory gamma subunit	-	ame04068(FoxO signaling pathway);ame04213(Longevity regulating pathway - multiple species)	-	-	345.23	308.93	357.68	505.82	844.75	771.49	17.86	14.62	18.78	30.34	52.48	52.07	17.09	44.96	-1.36084	down	0.00068988	0.0437535	yes
TRINITY_DN1210_c0_g1	2814	TRINITY_DN1210_c0_g1_i1;TRINITY_DN1210_c0_g1_i11;TRINITY_DN1210_c0_g1_i12;TRINITY_DN1210_c0_g1_i13;TRINITY_DN1210_c0_g1_i14;TRINITY_DN1210_c0_g1_i15;TRINITY_DN1210_c0_g1_i16;TRINITY_DN1210_c0_g1_i17;TRINITY_DN1210_c0_g1_i18;TRINITY_DN1210_c0_g1_i19;TRINITY_DN1210_c0_g1_i2;TRINITY_DN1210_c0_g1_i20;TRINITY_DN1210_c0_g1_i21;TRINITY_DN1210_c0_g1_i24;TRINITY_DN1210_c0_g1_i25;TRINITY_DN1210_c0_g1_i26;T…	-	-	-	-	-	-	-	-	-	-	-	11103.9	11693.5	9922.93	12508.8	17432.8	31495.3	907.29	920.11	885.31	1296.81	2054.06	4215.08	904.24	2521.98	-1.22558	down	0.000692007	0.0437535	yes
TRINITY_DN25977_c0_g1	335	TRINITY_DN25977_c0_g1_i1	NADH dehydrogenase subunit 3 (mitochondrion) [Mus musculus]	Mtnd3	NADH-ubiquinone oxidoreductase chain 3 OS=Mus musculus GN=Mtnd3 PE=1 SV=3	GO:0005739(mitochondrion);GO:0005747(mitochondrial respiratory chain complex I);GO:0006979(response to oxidative stress);GO:0008137(NADH dehydrogenase (ubiquinone) activity);GO:0009725(response to hormone);GO:0016020(membrane);GO:0016021(integral component of membrane);GO:0016491(oxidoreductase activity);GO:0030964(NADH dehydrogenase complex);GO:0055114(oxidation-reduction process);GO:0070469(res…	COG0838(NDH-1 shuttles electrons from NADH, via FMN and iron- sulfur (Fe-S) centers, to quinones in the respiratory chain)	K03880	NADH-ubiquinone oxidoreductase chain 3	EC:1.6.5.3	mmu00190(Oxidative phosphorylation);mmu04723(Retrograde endocannabinoid signaling);mmu04714(Thermogenesis);mmu05012(Parkinson disease)	P03899.3 PF00507.17;Oxidored_q4;	-	172.33	60.94	59.74	4	0	0	139.75	47.6	49.36	4.06	0	0	78.9	1.35	5.78809	up	0.000696625	0.0437535	yes
TRINITY_DN776_c1_g1	2099	TRINITY_DN776_c1_g1_i1	-	-	-	-	-	-	-	-	-	-	-	345.25	227.34	283.93	530.63	712.39	668.82	13.17	7.97	11.05	23.46	33.26	34.01	10.73	30.24	-1.45255	down	0.000696839	0.0437535	yes
TRINITY_DN3107_c0_g3	693	TRINITY_DN3107_c0_g3_i1	PREDICTED: 46 kDa FK506-binding nuclear protein [Habropoda laboriosa]	FKBP46	46 kDa FK506-binding nuclear protein OS=Spodoptera frugiperda GN=FKBP46 PE=2 SV=1	GO:0003755(peptidyl-prolyl cis-trans isomerase activity);GO:0005528(FK506 binding);GO:0005789(endoplasmic reticulum membrane);GO:0061077(chaperone-mediated protein folding)	COG0545(Peptidyl-prolyl cis-trans isomerase)	NA	NA	NA	-	-	-	2211.47	2215.13	1975.85	1198.53	625.37	529.17	534.59	468.35	460.54	336.03	142.7	128.24	487.83	202.32	1.15339	up	0.000699814	0.0437719	yes
TRINITY_DN22312_c0_g1	564	TRINITY_DN22312_c0_g1_i1	-	-	-	-	-	-	-	-	-	-	-	0	0	0	5.83	26.47	35.49	0	0	0	2.66	8.8	12.5	0	7.99	-7.65907	down	0.000702586	0.0437775	yes
TRINITY_DN50_c0_g1	9473	TRINITY_DN50_c0_g1_i1;TRINITY_DN50_c0_g1_i10;TRINITY_DN50_c0_g1_i11;TRINITY_DN50_c0_g1_i12;TRINITY_DN50_c0_g1_i13;TRINITY_DN50_c0_g1_i14;TRINITY_DN50_c0_g1_i15;TRINITY_DN50_c0_g1_i16;TRINITY_DN50_c0_g1_i17;TRINITY_DN50_c0_g1_i18;TRINITY_DN50_c0_g1_i19;TRINITY_DN50_c0_g1_i2;TRINITY_DN50_c0_g1_i20;TRINITY_DN50_c0_g1_i21;TRINITY_DN50_c0_g1_i22;TRINITY_DN50_c0_g1_i23;TRINITY_DN50_c0_g1_i3;TRINITY_DN5…	PREDICTED: PHD finger protein rhinoceros isoform X1 [Megachile rotundata]	CECR2	Cat eye syndrome critical region protein 2 OS=Homo sapiens GN=CECR2 PE=1 SV=2	GO:0003674(molecular_function);GO:0005575(cellular_component);GO:0007611(learning or memory);GO:0007616(long-term memory);GO:0008355(olfactory learning)	COG5076(bromodomain)	NA	NA	NA	-	A0A088A9Q4.1 PF00439.23;Bromodomain;	MBD	933.1	861.41	949.42	996.09	1745	2225.04	7.16	6.26	7.17	8.31	19.81	31.53	6.86	19.88	-1.15994	down	0.000712696	0.0442205	yes
TRINITY_DN149_c0_g2	11476	TRINITY_DN149_c0_g2_i1;TRINITY_DN149_c0_g2_i2;TRINITY_DN149_c0_g2_i3;TRINITY_DN149_c0_g2_i4;TRINITY_DN149_c0_g2_i5;TRINITY_DN149_c0_g2_i6;TRINITY_DN149_c0_g2_i7;TRINITY_DN149_c0_g2_i8;TRINITY_DN149_c0_g2_i9	PREDICTED: uncharacterized protein LOC100882505 isoform X1 [Megachile rotundata]	Wnk3	Serine/threonine-protein kinase WNK3 OS=Mus musculus GN=Wnk3 PE=1 SV=3	GO:0004672(protein kinase activity);GO:0004674(protein serine/threonine kinase activity);GO:0005524(ATP binding);GO:0005737(cytoplasm);GO:0005829(cytosol);GO:0006468(protein phosphorylation);GO:0007411(axon guidance);GO:0030177(positive regulation of Wnt signaling pathway);GO:0032414(positive regulation of ion transmembrane transporter activity);GO:0035220(wing disc development);GO:0035556(intrac…	ENOG410XQWZ(WNK lysine deficient protein kinase)	NA	NA	NA	-	H9JV52.1 PF00069.23;Pkinase;	-	4360.35	3631.7	4026.6	4358.04	7031.46	9913.15	32.81	26.25	30.77	37.89	66.5	106.2	29.94	70.2	-1.13253	down	0.000715113	0.0442205	yes
TRINITY_DN3280_c0_g1	3939	TRINITY_DN3280_c0_g1_i1;TRINITY_DN3280_c0_g1_i2;TRINITY_DN3280_c0_g1_i3	PREDICTED: uncharacterized protein LOC100875901 isoform X1 [Megachile rotundata]	-	-	-	ENOG410YQX1(NA)	-	-	-	-	-	-	902.41	845.2	713.12	1148.52	1420	1464.61	16.93	14.7	13.76	25.05	33.49	37.84	15.13	32.13	-1.01336	down	0.000732223	0.0451077	yes
TRINITY_DN18976_c0_g1	8539	TRINITY_DN18976_c0_g1_i1;TRINITY_DN18976_c0_g1_i2;TRINITY_DN18976_c0_g1_i3;TRINITY_DN18976_c0_g1_i4	PREDICTED: uncharacterized protein LOC100874903 [Megachile rotundata]	ANPEP	Aminopeptidase Ey OS=Gallus gallus GN=ANPEP PE=1 SV=1	GO:0005737(cytoplasm);GO:0005886(plasma membrane);GO:0006508(proteolysis);GO:0008270(zinc ion binding);GO:0042277(peptide binding);GO:0043171(peptide catabolic process);GO:0070006(metalloaminopeptidase activity)	COG0308(aminopeptidase)	K11140	aminopeptidase N	EC:3.4.11.2	cfo00480(Glutathione metabolism)	A0A087ZUB4.1 PF01433.18;Peptidase_M1;	-	3109.02	2826.72	2969.88	2845.98	5918.4	8467.12	64.74	71	74.95	50.96	92.19	172.14	70.23	105.1	-1.26113	down	0.000737339	0.0452521	yes
TRINITY_DN16858_c0_g1	3009	TRINITY_DN16858_c0_g1_i1;TRINITY_DN16858_c0_g1_i2;TRINITY_DN16858_c0_g1_i3;TRINITY_DN16858_c0_g1_i4	sodium-coupled monocarboxylate transporter 2 [Apis mellifera]	Slc5a12	Sodium-coupled monocarboxylate transporter 2 OS=Mus musculus GN=Slc5a12 PE=1 SV=1	GO:0005887(integral component of plasma membrane);GO:0015293(symporter activity)	COG0591(symporter)	NA	NA	NA	-	A0A088A2L8.1 PF00474.15;SSF;	-	2735.97	2109.42	2114.23	2443.29	4238.37	6326.89	73.41	51.37	57.55	93.32	180.48	286.34	60.78	186.71	-1.21338	down	0.000752279	0.0459776	yes
TRINITY_DN13788_c0_g2	714	TRINITY_DN13788_c0_g2_i1	-	-	-	-	-	-	-	-	-	-	-	13.4	22.64	29.94	0	0	0	3.02	4.47	6.53	0	0	0	4.67	0	7.33673	up	0.000754793	0.0459776	yes
TRINITY_DN1353_c0_g1	5887	TRINITY_DN1353_c0_g1_i1	PREDICTED: uncharacterized protein LOC100881914 [Megachile rotundata]	CSRNP2	Cysteine/serine-rich nuclear protein 2 OS=Homo sapiens GN=CSRNP2 PE=1 SV=1	GO:0005634(nucleus);GO:0008285(negative regulation of cell proliferation);GO:0043565(sequence-specific DNA binding);GO:0045944(positive regulation of transcription by RNA polymerase II)	ENOG410XREB(cysteine-serine-rich nuclear protein)	NA	NA	NA	-	F4WU51.1 PF16019.3;CSRNP_N;	CSRNP_N	2682.08	2427.79	2598.92	2824.78	4580.8	5914.74	30.68	25.76	30.62	37.47	66.71	94.34	29.02	66.17	-1.09339	down	0.000784043	0.0475818	yes
TRINITY_DN5569_c0_g3	1541	TRINITY_DN5569_c0_g3_i1	PREDICTED: uncharacterized protein LOC100880045 isoform X1 [Megachile rotundata]	-	-	-	-	-	-	-	-	-	-	5809.33	22973.2	1240.33	347.79	2257.4	114.65	330.29	1192.01	71.49	22.91	152.97	8.43	531.26	61.44	3.19482	up	0.000796486	0.0478038	yes
TRINITY_DN2875_c0_g1	8716	TRINITY_DN2875_c0_g1_i1;TRINITY_DN2875_c0_g1_i10;TRINITY_DN2875_c0_g1_i11;TRINITY_DN2875_c0_g1_i12;TRINITY_DN2875_c0_g1_i13;TRINITY_DN2875_c0_g1_i14;TRINITY_DN2875_c0_g1_i15;TRINITY_DN2875_c0_g1_i2;TRINITY_DN2875_c0_g1_i4;TRINITY_DN2875_c0_g1_i5;TRINITY_DN2875_c0_g1_i8;TRINITY_DN2875_c0_g1_i9	zinc finger SWIM domain-containing protein 8, partial [Bombus impatiens]	Zswim8	Zinc finger SWIM domain-containing protein 8 OS=Mus musculus GN=Zswim8 PE=1 SV=1	GO:0008270(zinc ion binding);GO:0019233(sensory perception of pain);GO:0031462(Cul2-RING ubiquitin ligase complex);GO:1902667(regulation of axon guidance)	ENOG410XPG2(zinc finger SWIM-type containing 8)	K01231	alpha-mannosidase II	EC:3.2.1.114	nfu00510(N-Glycan biosynthesis)	A0A088ADL5.1 PF04434.15;SWIM;	-	2760	2326.89	2787.31	2834.24	4680.54	6793.47	22.97	18.26	23.75	26.68	47.7	76.35	21.66	50.24	-1.1682	down	0.000802997	0.0478434	yes
TRINITY_DN1090_c0_g1	6276	TRINITY_DN1090_c0_g1_i1	PREDICTED: mothers against decapentaplegic homolog 7 [Megachile rotundata]	SMAD6	Mothers against decapentaplegic homolog 6 OS=Gallus gallus GN=SMAD6 PE=2 SV=1	GO:0000978(RNA polymerase II proximal promoter sequence-specific DNA binding);GO:0001657(ureteric bud development);GO:0003170(heart valve development);GO:0003281(ventricular septum development);GO:0003682(chromatin binding);GO:0003700(DNA binding transcription factor activity);GO:0005634(nucleus);GO:0005667(transcription factor complex);GO:0005768(endosome);GO:0006351(transcription, DNA-templated…	ENOG410XQKU(SMAD family member)	K04677	mothers against decapentaplegic homolog 6	-	bter04350(TGF-beta signaling pathway)	A0A088AG08.1 PF03166.12;MH2;	MH1	986.87	965.76	1162.84	1190.2	1900.54	2383.78	10.53	9.57	12.79	14.74	25.86	35.53	10.96	25.38	-1.1141	down	0.000823725	0.0486564	yes
TRINITY_DN3966_c0_g1	5040	TRINITY_DN3966_c0_g1_i1	PREDICTED: ets DNA-binding protein pokkuri [Megachile rotundata]	aop	Ets DNA-binding protein pokkuri OS=Drosophila melanogaster GN=aop PE=1 SV=2	GO:0000981(RNA polymerase II transcription factor activity, sequence-specific DNA binding);GO:0005634(nucleus);GO:0006357(regulation of transcription by RNA polymerase II);GO:0030154(cell differentiation)	ENOG4111K4J(Ets domain transcription factor)	K03211	ETS translocation variant 6/7	-	ame04013(MAPK signaling pathway - fly);ame04320(Dorso-ventral axis formation)	E2C7L7.1 PF00178.20;Ets;	ETS	894.72	852.26	1147.6	1422.36	1512.92	1823.16	12.12	10.7	16	22.35	26.01	34.32	12.94	27.56	-1.01266	down	0.000825594	0.0486564	yes
TRINITY_DN27643_c0_g1	787	TRINITY_DN27643_c0_g1_i1	Spindle and Kinetochore-Associated protein homolog [Caenorhabditis elegans]	-	-	-	ENOG4110M4Q(NA)	-	-	-	-	-	-	26.42	34	33	1	0	0	4.79	5.41	5.82	0.21	0	0	5.34	0.07	5.83673	up	0.000837451	0.0488881	yes
TRINITY_DN22554_c0_g2	2583	TRINITY_DN22554_c0_g2_i1;TRINITY_DN22554_c0_g2_i2	PREDICTED: glutamate dehydrogenase, mitochondrial [Megachile rotundata]	Gdh	Glutamate dehydrogenase, mitochondrial OS=Drosophila melanogaster GN=Gdh PE=1 SV=2	GO:0004352(glutamate dehydrogenase (NAD+) activity);GO:0004353(glutamate dehydrogenase [NAD(P)+] activity);GO:0005737(cytoplasm);GO:0005739(mitochondrion);GO:0005759(mitochondrial matrix);GO:0005829(cytosol);GO:0006116(NADH oxidation);GO:0006536(glutamate metabolic process);GO:0019551(glutamate catabolic process to 2-oxoglutarate);GO:0042802(identical protein binding);GO:0046693(sperm storage)	COG0334(oxidoreductase activity, acting on the CH-NH2 group of donors, NAD or NADP as acceptor)	K00261	glutamate dehydrogenase (NAD(P)+)	EC:1.4.1.3	bter00910(Nitrogen metabolism);bter00250(Alanine, aspartate and glutamate metabolism);bter00220(Arginine biosynthesis);bter00471(D-Glutamine and D-glutamate metabolism)	K7IYA3.1 PF00208.19;ELFV_dehydrog;	-	13299.8	10596.6	12752.2	14890.2	20578	25477.1	388.51	285.42	381.51	504.08	744.33	1005	351.81	751.14	-1.03482	down	0.000838185	0.0488881	yes
TRINITY_DN10_c0_g1	7186	TRINITY_DN10_c0_g1_i1;TRINITY_DN10_c0_g1_i10;TRINITY_DN10_c0_g1_i11;TRINITY_DN10_c0_g1_i12;TRINITY_DN10_c0_g1_i13;TRINITY_DN10_c0_g1_i2;TRINITY_DN10_c0_g1_i3;TRINITY_DN10_c0_g1_i4;TRINITY_DN10_c0_g1_i5;TRINITY_DN10_c0_g1_i6;TRINITY_DN10_c0_g1_i7;TRINITY_DN10_c0_g1_i8;TRINITY_DN10_c0_g1_i9	PREDICTED: patched domain-containing protein 3 isoform X1 [Megachile rotundata]	Ptchd3	Patched domain-containing protein 3 OS=Mus musculus GN=Ptchd3 PE=1 SV=1	GO:0005886(plasma membrane);GO:0016021(integral component of membrane);GO:0030659(cytoplasmic vesicle membrane)	ENOG410XRZ4(patched domain containing)	K12385	Niemann-Pick C1 protein	-	obi04142(Lysosome)	A0A087ZSR5.1 PF02460.16;Patched;	-	2633.22	3034.64	2366.68	2928.41	4903.16	5886.6	43.78	47.6	42.08	50.8	88.79	121.23	44.49	86.94	-1.07786	down	0.000838509	0.0488881	yes
TRINITY_DN4723_c0_g2	1119	TRINITY_DN4723_c0_g2_i1	PREDICTED: ribonuclease H1 isoform X1 [Megachile rotundata]	RNASEH1	Ribonuclease H1 OS=Homo sapiens GN=RNASEH1 PE=1 SV=2	GO:0004523(RNA-DNA hybrid ribonuclease activity);GO:0043137(DNA replication, removal of RNA primer)	COG0328(ribonuclease H activity)	K03469	ribonuclease HI	EC:3.1.26.4	ame03030(DNA replication)	A0A088AKX5.1 PF00075.22;RNase_H;	-	6631.24	7805.03	7034.01	3758.69	2686.3	1198.65	613.65	650.81	651.82	402.78	282.1	135.78	638.76	273.55	1.21095	up	0.000843925	0.0489255	yes
TRINITY_DN25924_c0_g1	615	TRINITY_DN25924_c0_g1_i1	Uncharacterized protein CELE_F53B2.8 [Caenorhabditis elegans]	-	-	-	-	-	-	-	-	-	-	20.98	18	21	0	0	0	6.7	5.08	6.45	0	0	0	6.08	0	7.19485	up	0.000845145	0.0489255	yes
TRINITY_DN10893_c0_g1	903	TRINITY_DN10893_c0_g1_i1	RNA Binding Motif protein homolog [Caenorhabditis elegans]	RBM42	RNA-binding protein 42 OS=Bos taurus GN=RBM42 PE=2 SV=1	GO:0003676(nucleic acid binding);GO:0003723(RNA binding)	ENOG4111N9B(RNA binding motif protein 42)	NA	NA	NA	-	A0A0N5AFQ9.1 PF00076.20;RRM_1;	-	29	29	34.01	1	0	0	3.95	3.51	4.57	0.16	0	0	4.01	0.05	5.82307	up	0.000850909	0.0490851	yes
