# Supplementary material for: Transcriptome Analysis Provides Insights into Water Immersion Promoting the Decocooning of Osmia excavata Alfken
Source: Insects. 2024 Apr 18;15(4):288. doi: 10.3390/insects15040288 (PMC11049900; doi:10.3390/insects15040288)
Supplement: Supplementary file 1 [file insects-15-00288-s001.zip › Supplementary Files-proofreading/Table S3 GO enrichment analysis.xlsx]

## Sheet: biological process
GO_ID	GO_Term	GO_Function	GO_Level	S gene number	TS gene number	B gene number	TB gene number	pvalue
GO:0060048	cardiac muscle contraction	biological_process	8	9	210	24	20711	1.09324e-12
GO:0055003	cardiac myofibril assembly	biological_process	8	7	210	18	20711	2.88599e-10
GO:0048739	cardiac muscle fiber development	biological_process	9	6	210	12	20711	8.88604e-10
GO:0006941	striated muscle contraction	biological_process	7	7	210	21	20711	1.02762e-09
GO:0055008	cardiac muscle tissue morphogenesis	biological_process	7	6	210	13	20711	1.63634e-09
GO:0055010	ventricular cardiac muscle tissue morphogenesis	biological_process	8	5	210	11	20711	4.49299e-08
GO:0035995	detection of muscle stretch	biological_process	7	4	210	6	20711	1.51661e-07
GO:0045214	sarcomere organization	biological_process	9	9	210	90	20711	3.31332e-07
GO:0003300	cardiac muscle hypertrophy	biological_process	8	4	210	7	20711	3.5106e-07
GO:0030240	skeletal muscle thin filament assembly	biological_process	7	5	210	16	20711	4.07582e-07
GO:0007512	adult heart development	biological_process	7	4	210	8	20711	6.96537e-07
GO:0030241	skeletal muscle myosin thick filament assembly	biological_process	8	5	210	18	20711	7.8638e-07
GO:0071688	striated muscle myosin thick filament assembly	biological_process	7	5	210	19	20711	1.05845e-06
GO:0002026	regulation of the force of heart contraction	biological_process	9	4	210	12	20711	4.77082e-06
GO:0048769	sarcomerogenesis	biological_process	9	3	210	5	20711	1.0124e-05
GO:0006936	muscle contraction	biological_process	6	6	210	54	20711	1.74178e-05
GO:0010906	regulation of glucose metabolic process	biological_process	9	7	210	90	20711	3.65417e-05
GO:0050714	positive regulation of protein secretion	biological_process	10	4	210	22	20711	6.51073e-05
GO:0030239	myofibril assembly	biological_process	7	4	210	23	20711	7.81902e-05
GO:0003007	heart morphogenesis	biological_process	6	4	210	23	20711	7.81902e-05
GO:0006603	phosphocreatine metabolic process	biological_process	7	2	210	2	20711	0.000102326
GO:0003143	embryonic heart tube morphogenesis	biological_process	6	2	210	2	20711	0.000102326
GO:0043462	regulation of ATPase activity	biological_process	7	2	210	2	20711	0.000102326
GO:0007507	heart development	biological_process	6	7	210	120	20711	0.000225281
GO:0010737	protein kinase A signaling	biological_process	6	3	210	13	20711	0.000272673
GO:0007472	wing disc morphogenesis	biological_process	8	3	210	14	20711	0.000344448
GO:0048747	muscle fiber development	biological_process	8	3	210	14	20711	0.000344448
GO:1901897	regulation of relaxation of cardiac muscle	biological_process	9	2	210	4	20711	0.000605763
GO:0007402	ganglion mother cell fate determination	biological_process	7	2	210	4	20711	0.000605763
GO:0060419	heart growth	biological_process	5	2	210	4	20711	0.000605763
GO:0043056	forward locomotion	biological_process	5	2	210	4	20711	0.000605763
GO:0042773	ATP synthesis coupled electron transport	biological_process	8	3	210	17	20711	0.000629191
GO:0008355	olfactory learning	biological_process	7	4	210	43	20711	0.000930062
GO:0048513	animal organ development	biological_process	5	2	210	5	20711	0.00100285
GO:0014898	cardiac muscle hypertrophy in response to stress	biological_process	6	2	210	5	20711	0.00100285
GO:0007432	salivary gland boundary specification	biological_process	7	2	210	5	20711	0.00100285
GO:0030198	extracellular matrix organization	biological_process	6	6	210	114	20711	0.00108764
GO:0007015	actin filament organization	biological_process	6	6	210	115	20711	0.00113798
GO:0001756	somitogenesis	biological_process	7	3	210	22	20711	0.0013727
GO:0051294	establishment of spindle orientation	biological_process	9	2	210	6	20711	0.00149423
GO:0016334	establishment or maintenance of polarity of follicular epithelium	biological_process	5	2	210	6	20711	0.00149423
GO:0006003	fructose 2,6-bisphosphate metabolic process	biological_process	7	2	210	6	20711	0.00149423
GO:0042338	cuticle development involved in collagen and cuticulin-based cuticle molting cycle	biological_process	7	2	210	7	20711	0.00207797
GO:0019646	aerobic electron transport chain	biological_process	9	2	210	7	20711	0.00207797
GO:0035220	wing disc development	biological_process	7	4	210	55	20711	0.00233839
GO:0030707	ovarian follicle cell development	biological_process	8	4	210	55	20711	0.00233839
GO:0035556	intracellular signal transduction	biological_process	5	9	210	287	20711	0.00272059
GO:0007622	rhythmic behavior	biological_process	4	2	210	8	20711	0.00275214
GO:0055002	striated muscle cell development	biological_process	7	2	210	8	20711	0.00275214
GO:0060361	flight	biological_process	4	2	210	8	20711	0.00275214
GO:0007399	nervous system development	biological_process	6	6	210	138	20711	0.0028696
GO:0043508	negative regulation of JUN kinase activity	biological_process	13	2	210	9	20711	0.00351489
GO:0002027	regulation of heart rate	biological_process	9	2	210	9	20711	0.00351489
GO:0050767	regulation of neurogenesis	biological_process	8	2	210	9	20711	0.00351489
GO:0021591	ventricular system development	biological_process	6	2	210	9	20711	0.00351489
GO:0018105	peptidyl-serine phosphorylation	biological_process	10	6	210	144	20711	0.0035409
GO:0021782	glial cell development	biological_process	6	2	210	10	20711	0.00436436
GO:0060047	heart contraction	biological_process	7	2	210	10	20711	0.00436436
GO:0006874	cellular calcium ion homeostasis	biological_process	11	4	210	70	20711	0.00558865
GO:0007010	cytoskeleton organization	biological_process	6	4	210	70	20711	0.00558865
GO:0070868	heterochromatin organization involved in chromatin silencing	biological_process	7	2	210	12	20711	0.00631622
GO:0007280	pole cell migration	biological_process	8	2	210	12	20711	0.00631622
GO:0045732	positive regulation of protein catabolic process	biological_process	8	3	210	39	20711	0.00717984
GO:0048260	positive regulation of receptor-mediated endocytosis	biological_process	9	2	210	13	20711	0.00741504
GO:0007616	long-term memory	biological_process	6	3	210	40	20711	0.0077048
GO:0007409	axonogenesis	biological_process	9	4	210	78	20711	0.00816747
GO:0007314	oocyte anterior/posterior axis specification	biological_process	6	2	210	14	20711	0.00859348
GO:0007528	neuromuscular junction development	biological_process	6	3	210	43	20711	0.00941306
GO:0045475	locomotor rhythm	biological_process	5	3	210	44	20711	0.0100275
GO:0051282	regulation of sequestering of calcium ion	biological_process	6	1	210	1	20711	0.0101395
GO:1901877	negative regulation of calcium ion binding	biological_process	7	1	210	1	20711	0.0101395
GO:0036022	limb joint morphogenesis	biological_process	5	1	210	1	20711	0.0101395
GO:0071073	positive regulation of phospholipid biosynthetic process	biological_process	9	1	210	1	20711	0.0101395
GO:0046314	phosphocreatine biosynthetic process	biological_process	8	1	210	1	20711	0.0101395
GO:1902832	negative regulation of cell proliferation in dorsal spinal cord	biological_process	9	1	210	1	20711	0.0101395
GO:2001245	regulation of phosphatidylcholine biosynthetic process	biological_process	7	1	210	1	20711	0.0101395
GO:0061044	negative regulation of vascular wound healing	biological_process	9	1	210	1	20711	0.0101395
GO:1902459	positive regulation of stem cell population maintenance	biological_process	7	1	210	1	20711	0.0101395
GO:0098735	positive regulation of the force of heart contraction	biological_process	10	1	210	1	20711	0.0101395
GO:0035523	protein K29-linked deubiquitination	biological_process	10	1	210	1	20711	0.0101395
GO:0048368	lateral mesoderm development	biological_process	7	1	210	1	20711	0.0101395
GO:0045873	negative regulation of sevenless signaling pathway	biological_process	9	1	210	1	20711	0.0101395
GO:0006343	establishment of chromatin silencing	biological_process	7	1	210	1	20711	0.0101395
GO:0043987	histone H3-S10 phosphorylation	biological_process	12	1	210	1	20711	0.0101395
GO:0061515	myeloid cell development	biological_process	6	1	210	1	20711	0.0101395
GO:0014866	skeletal myofibril assembly	biological_process	8	1	210	1	20711	0.0101395
GO:1990168	protein K33-linked deubiquitination	biological_process	10	1	210	1	20711	0.0101395
GO:0032368	regulation of lipid transport	biological_process	7	1	210	1	20711	0.0101395
GO:0036309	protein localization to M-band	biological_process	8	1	210	1	20711	0.0101395
GO:0060487	lung epithelial cell differentiation	biological_process	7	1	210	1	20711	0.0101395
GO:0034196	acylglycerol transport	biological_process	8	1	210	1	20711	0.0101395
GO:0030710	regulation of border follicle cell delamination	biological_process	7	1	210	1	20711	0.0101395
GO:0032972	regulation of muscle filament sliding speed	biological_process	10	1	210	1	20711	0.0101395
GO:0098529	neuromuscular junction development, skeletal muscle fiber	biological_process	7	1	210	1	20711	0.0101395
GO:0035491	positive regulation of leukotriene production involved in inflammatory response	biological_process	10	1	210	1	20711	0.0101395
GO:0002809	negative regulation of antibacterial peptide biosynthetic process	biological_process	11	1	210	1	20711	0.0101395
GO:0090327	negative regulation of locomotion involved in locomotory behavior	biological_process	7	1	210	1	20711	0.0101395
GO:1903920	positive regulation of actin filament severing	biological_process	7	1	210	1	20711	0.0101395
GO:1904800	negative regulation of neuron remodeling	biological_process	12	1	210	1	20711	0.0101395
GO:1903798	regulation of production of miRNAs involved in gene silencing by miRNA	biological_process	11	1	210	1	20711	0.0101395
GO:1901020	negative regulation of calcium ion transmembrane transporter activity	biological_process	8	1	210	1	20711	0.0101395
GO:0046320	regulation of fatty acid oxidation	biological_process	9	1	210	1	20711	0.0101395
GO:1902844	positive regulation of spinal cord association neuron differentiation by negative regulation of canonical Wnt signaling pathway	biological_process	10	1	210	1	20711	0.0101395
GO:0050929	induction of negative chemotaxis	biological_process	10	1	210	1	20711	0.0101395
GO:0006000	fructose metabolic process	biological_process	8	2	210	16	20711	0.0111823
GO:0008016	regulation of heart contraction	biological_process	8	2	210	16	20711	0.0111823
GO:0016199	axon midline choice point recognition	biological_process	7	2	210	16	20711	0.0111823
GO:0009791	post-embryonic development	biological_process	4	3	210	46	20711	0.0113251
GO:0050807	regulation of synapse organization	biological_process	7	2	210	18	20711	0.0140694
GO:0042051	compound eye photoreceptor development	biological_process	9	2	210	19	20711	0.0156207
GO:0048813	dendrite morphogenesis	biological_process	9	4	210	97	20711	0.017114
GO:0045944	positive regulation of transcription by RNA polymerase II	biological_process	10	11	210	524	20711	0.0183295
GO:0000122	negative regulation of transcription by RNA polymerase II	biological_process	10	9	210	390	20711	0.0183952
GO:0072499	photoreceptor cell axon guidance	biological_process	7	2	210	21	20711	0.018931
GO:0001745	compound eye morphogenesis	biological_process	8	3	210	57	20711	0.0201344
GO:0045497	female analia development	biological_process	6	1	210	2	20711	0.0201768
GO:0090528	smooth septate junction assembly	biological_process	10	1	210	2	20711	0.0201768
GO:0061304	retinal blood vessel morphogenesis	biological_process	7	1	210	2	20711	0.0201768
GO:0010837	regulation of keratinocyte proliferation	biological_process	8	1	210	2	20711	0.0201768
GO:0042062	long-term strengthening of neuromuscular junction	biological_process	9	1	210	2	20711	0.0201768
GO:0001952	regulation of cell-matrix adhesion	biological_process	7	1	210	2	20711	0.0201768
GO:1902948	negative regulation of tau-protein kinase activity	biological_process	12	1	210	2	20711	0.0201768
GO:0030049	muscle filament sliding	biological_process	8	1	210	2	20711	0.0201768
GO:0030916	otic vesicle formation	biological_process	7	1	210	2	20711	0.0201768
GO:0048667	cell morphogenesis involved in neuron differentiation	biological_process	8	1	210	2	20711	0.0201768
GO:0043353	enucleate erythrocyte differentiation	biological_process	8	1	210	2	20711	0.0201768
GO:0048339	paraxial mesoderm development	biological_process	7	1	210	2	20711	0.0201768
GO:1902960	negative regulation of aspartic-type endopeptidase activity involved in amyloid precursor protein catabolic process	biological_process	12	1	210	2	20711	0.0201768
GO:1902997	negative regulation of neurofibrillary tangle assembly	biological_process	9	1	210	2	20711	0.0201768
GO:0070884	regulation of calcineurin-NFAT signaling cascade	biological_process	11	1	210	2	20711	0.0201768
GO:0032386	regulation of intracellular transport	biological_process	7	1	210	2	20711	0.0201768
GO:0061624	fructose catabolic process to hydroxyacetone phosphate and glyceraldehyde-3-phosphate	biological_process	10	1	210	2	20711	0.0201768
GO:1901031	regulation of response to reactive oxygen species	biological_process	8	1	210	2	20711	0.0201768
GO:1902963	negative regulation of metalloendopeptidase activity involved in amyloid precursor protein catabolic process	biological_process	10	1	210	2	20711	0.0201768
GO:0007553	regulation of ecdysteroid metabolic process	biological_process	8	1	210	2	20711	0.0201768
GO:0060242	contact inhibition	biological_process	4	1	210	2	20711	0.0201768
GO:0035626	juvenile hormone mediated signaling pathway	biological_process	6	1	210	2	20711	0.0201768
GO:0014910	regulation of smooth muscle cell migration	biological_process	8	1	210	2	20711	0.0201768
GO:0035385	Roundabout signaling pathway	biological_process	6	1	210	2	20711	0.0201768
GO:0072091	regulation of stem cell proliferation	biological_process	7	1	210	2	20711	0.0201768
GO:0060449	bud elongation involved in lung branching	biological_process	8	1	210	2	20711	0.0201768
GO:0045496	male analia development	biological_process	6	1	210	2	20711	0.0201768
GO:0070413	trehalose metabolism in response to stress	biological_process	9	1	210	2	20711	0.0201768
GO:0072307	regulation of metanephric nephron tubule epithelial cell differentiation	biological_process	10	1	210	2	20711	0.0201768
GO:1902771	positive regulation of choline O-acetyltransferase activity	biological_process	8	1	210	2	20711	0.0201768
GO:0005992	trehalose biosynthetic process	biological_process	9	1	210	2	20711	0.0201768
GO:1902955	positive regulation of early endosome to recycling endosome transport	biological_process	8	1	210	2	20711	0.0201768
GO:1902953	positive regulation of ER to Golgi vesicle-mediated transport	biological_process	9	1	210	2	20711	0.0201768
GO:0007429	secondary branching, open tracheal system	biological_process	8	1	210	2	20711	0.0201768
GO:0010632	regulation of epithelial cell migration	biological_process	8	1	210	2	20711	0.0201768
GO:0061328	posterior Malpighian tubule development	biological_process	7	1	210	2	20711	0.0201768
GO:0002074	extraocular skeletal muscle development	biological_process	9	1	210	2	20711	0.0201768
GO:0030714	anterior/posterior axis specification, follicular epithelium	biological_process	5	1	210	2	20711	0.0201768
GO:1990845	adaptive thermogenesis	biological_process	4	1	210	2	20711	0.0201768
GO:0006543	glutamine catabolic process	biological_process	12	1	210	2	20711	0.0201768
GO:0045855	negative regulation of pole plasm oskar mRNA localization	biological_process	7	1	210	2	20711	0.0201768
GO:0007614	short-term memory	biological_process	6	2	210	22	20711	0.0206868
GO:0009755	hormone-mediated signaling pathway	biological_process	5	2	210	23	20711	0.0225077
GO:0045444	fat cell differentiation	biological_process	6	2	210	24	20711	0.0243923
GO:0019730	antimicrobial humoral response	biological_process	6	2	210	24	20711	0.0243923
GO:0046835	carbohydrate phosphorylation	biological_process	8	2	210	24	20711	0.0243923
GO:0043407	negative regulation of MAP kinase activity	biological_process	12	2	210	24	20711	0.0243923
GO:0008049	male courtship behavior	biological_process	7	2	210	24	20711	0.0243923
GO:0009060	aerobic respiration	biological_process	8	3	210	62	20711	0.0250897
GO:0030512	negative regulation of transforming growth factor beta receptor signaling pathway	biological_process	10	2	210	25	20711	0.0263391
GO:0033993	response to lipid	biological_process	6	2	210	25	20711	0.0263391
GO:0030509	BMP signaling pathway	biological_process	10	2	210	25	20711	0.0263391
GO:0006030	chitin metabolic process	biological_process	7	2	210	25	20711	0.0263391
GO:0046323	glucose import	biological_process	12	2	210	26	20711	0.0283465
GO:0030177	positive regulation of Wnt signaling pathway	biological_process	9	2	210	26	20711	0.0283465
GO:0048149	behavioral response to ethanol	biological_process	5	2	210	26	20711	0.0283465
GO:0046959	habituation	biological_process	7	1	210	3	20711	0.0301127
GO:0031887	lipid droplet transport along microtubule	biological_process	10	1	210	3	20711	0.0301127
GO:0061321	garland nephrocyte differentiation	biological_process	8	1	210	3	20711	0.0301127
GO:0046956	positive phototaxis	biological_process	8	1	210	3	20711	0.0301127
GO:0032878	regulation of establishment or maintenance of cell polarity	biological_process	6	1	210	3	20711	0.0301127
GO:0007352	zygotic specification of dorsal/ventral axis	biological_process	7	1	210	3	20711	0.0301127
GO:0046327	glycerol biosynthetic process from pyruvate	biological_process	10	1	210	3	20711	0.0301127
GO:0010693	negative regulation of alkaline phosphatase activity	biological_process	12	1	210	3	20711	0.0301127
GO:0019543	propionate catabolic process	biological_process	8	1	210	3	20711	0.0301127
GO:0048699	generation of neurons	biological_process	7	1	210	3	20711	0.0301127
GO:0007502	digestive tract mesoderm development	biological_process	6	1	210	3	20711	0.0301127
GO:0099504	synaptic vesicle cycle	biological_process	6	1	210	3	20711	0.0301127
GO:0030903	notochord development	biological_process	7	1	210	3	20711	0.0301127
GO:0007473	wing disc proximal/distal pattern formation	biological_process	8	1	210	3	20711	0.0301127
GO:0016335	morphogenesis of larval imaginal disc epithelium	biological_process	7	1	210	3	20711	0.0301127
GO:0032414	positive regulation of ion transmembrane transporter activity	biological_process	7	1	210	3	20711	0.0301127
GO:0090163	establishment of epithelial cell planar polarity	biological_process	7	1	210	3	20711	0.0301127
GO:0001300	chronological cell aging	biological_process	6	1	210	3	20711	0.0301127
GO:0030540	female genitalia development	biological_process	7	1	210	3	20711	0.0301127
GO:0060420	regulation of heart growth	biological_process	8	1	210	3	20711	0.0301127
GO:0033629	negative regulation of cell adhesion mediated by integrin	biological_process	7	1	210	3	20711	0.0301127
GO:0055009	atrial cardiac muscle tissue morphogenesis	biological_process	8	1	210	3	20711	0.0301127
GO:0072369	regulation of lipid transport by positive regulation of transcription from RNA polymerase II promoter	biological_process	11	1	210	3	20711	0.0301127
GO:0008038	neuron recognition	biological_process	5	1	210	3	20711	0.0301127
GO:0030857	negative regulation of epithelial cell differentiation	biological_process	8	1	210	3	20711	0.0301127
GO:0060581	cell fate commitment involved in pattern specification	biological_process	6	1	210	3	20711	0.0301127
GO:0038063	collagen-activated tyrosine kinase receptor signaling pathway	biological_process	8	1	210	3	20711	0.0301127
GO:0006942	regulation of striated muscle contraction	biological_process	9	1	210	3	20711	0.0301127
GO:0042381	hemolymph coagulation	biological_process	6	1	210	3	20711	0.0301127
GO:0071947	protein deubiquitination involved in ubiquitin-dependent protein catabolic process	biological_process	10	1	210	3	20711	0.0301127
GO:0032460	negative regulation of protein oligomerization	biological_process	8	1	210	3	20711	0.0301127
GO:0061045	negative regulation of wound healing	biological_process	8	1	210	3	20711	0.0301127
GO:1902165	regulation of intrinsic apoptotic signaling pathway in response to DNA damage by p53 class mediator	biological_process	9	1	210	3	20711	0.0301127
GO:0001763	morphogenesis of a branching structure	biological_process	5	1	210	3	20711	0.0301127
GO:0008407	chaeta morphogenesis	biological_process	6	2	210	27	20711	0.0304133
GO:0008406	gonad development	biological_process	6	3	210	67	20711	0.0306413
GO:0006807	nitrogen compound metabolic process	biological_process	4	2	210	28	20711	0.032538
GO:0007293	germarium-derived egg chamber formation	biological_process	5	2	210	29	20711	0.0347192
GO:0051124	synaptic growth at neuromuscular junction	biological_process	7	2	210	29	20711	0.0347192
GO:0007623	circadian rhythm	biological_process	4	3	210	71	20711	0.0355086
GO:0048489	synaptic vesicle transport	biological_process	6	2	210	30	20711	0.0369556
GO:0045859	regulation of protein kinase activity	biological_process	10	2	210	30	20711	0.0369556
GO:0045197	establishment or maintenance of epithelial cell apical/basal polarity	biological_process	7	2	210	31	20711	0.0392458
GO:0008582	regulation of synaptic growth at neuromuscular junction	biological_process	7	2	210	31	20711	0.0392458
GO:0043551	regulation of phosphatidylinositol 3-kinase activity	biological_process	9	1	210	4	20711	0.0399483
GO:0050806	positive regulation of synaptic transmission	biological_process	8	1	210	4	20711	0.0399483
GO:0055013	cardiac muscle cell development	biological_process	8	1	210	4	20711	0.0399483
GO:0010831	positive regulation of myotube differentiation	biological_process	10	1	210	4	20711	0.0399483
GO:0015918	sterol transport	biological_process	8	1	210	4	20711	0.0399483
GO:1900242	regulation of synaptic vesicle endocytosis	biological_process	8	1	210	4	20711	0.0399483
GO:0045716	positive regulation of low-density lipoprotein particle receptor biosynthetic process	biological_process	10	1	210	4	20711	0.0399483
GO:2000098	negative regulation of smooth muscle cell-matrix adhesion	biological_process	9	1	210	4	20711	0.0399483
GO:0035309	wing and notum subfield formation	biological_process	6	1	210	4	20711	0.0399483
GO:0042045	epithelial fluid transport	biological_process	7	1	210	4	20711	0.0399483
GO:0007516	hemocyte development	biological_process	6	1	210	4	20711	0.0399483
GO:0044539	long-chain fatty acid import	biological_process	10	1	210	4	20711	0.0399483
GO:0042066	perineurial glial growth	biological_process	7	1	210	4	20711	0.0399483
GO:0019551	glutamate catabolic process to 2-oxoglutarate	biological_process	10	1	210	4	20711	0.0399483
GO:1901896	positive regulation of calcium-transporting ATPase activity	biological_process	9	1	210	4	20711	0.0399483
GO:0014883	transition between fast and slow fiber	biological_process	8	1	210	4	20711	0.0399483
GO:0034616	response to laminar fluid shear stress	biological_process	6	1	210	4	20711	0.0399483
GO:0006116	NADH oxidation	biological_process	5	1	210	4	20711	0.0399483
GO:1903515	calcium ion transport from cytosol to endoplasmic reticulum	biological_process	8	1	210	4	20711	0.0399483
GO:0010991	negative regulation of SMAD protein complex assembly	biological_process	8	1	210	4	20711	0.0399483
GO:1903919	negative regulation of actin filament severing	biological_process	7	1	210	4	20711	0.0399483
GO:0043988	histone H3-S28 phosphorylation	biological_process	12	1	210	4	20711	0.0399483
GO:0003170	heart valve development	biological_process	5	1	210	4	20711	0.0399483
GO:0023052	signaling	biological_process	3	1	210	4	20711	0.0399483
GO:0046716	muscle cell cellular homeostasis	biological_process	5	2	210	32	20711	0.0415886
GO:0035019	somatic stem cell population maintenance	biological_process	5	2	210	33	20711	0.0439826
GO:0040003	chitin-based cuticle development	biological_process	6	2	210	33	20711	0.0439826
GO:0007611	learning or memory	biological_process	4	2	210	34	20711	0.0464266
GO:0042065	glial cell growth	biological_process	6	1	210	5	20711	0.0496847
GO:0055091	phospholipid homeostasis	biological_process	9	1	210	5	20711	0.0496847
GO:0040032	post-embryonic body morphogenesis	biological_process	6	1	210	5	20711	0.0496847
GO:0008078	mesodermal cell migration	biological_process	8	1	210	5	20711	0.0496847
GO:0035155	negative regulation of terminal cell fate specification, open tracheal system	biological_process	10	1	210	5	20711	0.0496847
GO:0010988	regulation of low-density lipoprotein particle clearance	biological_process	7	1	210	5	20711	0.0496847
GO:0060613	fat pad development	biological_process	8	1	210	5	20711	0.0496847
GO:0043567	regulation of insulin-like growth factor receptor signaling pathway	biological_process	8	1	210	5	20711	0.0496847
GO:0010757	negative regulation of plasminogen activation	biological_process	11	1	210	5	20711	0.0496847
GO:0045314	regulation of compound eye photoreceptor development	biological_process	12	1	210	5	20711	0.0496847
GO:0018990	ecdysis, chitin-based cuticle	biological_process	5	1	210	5	20711	0.0496847
GO:0060537	muscle tissue development	biological_process	6	1	210	5	20711	0.0496847
GO:0070831	basement membrane assembly	biological_process	6	1	210	5	20711	0.0496847
GO:0007366	periodic partitioning by pair rule gene	biological_process	7	1	210	5	20711	0.0496847
GO:0060446	branching involved in open tracheal system development	biological_process	7	1	210	5	20711	0.0496847
GO:0035006	melanization defense response	biological_process	8	1	210	5	20711	0.0496847
GO:0045196	establishment or maintenance of neuroblast polarity	biological_process	5	1	210	5	20711	0.0496847
GO:0090281	negative regulation of calcium ion import	biological_process	10	1	210	5	20711	0.0496847
GO:1903288	positive regulation of potassium ion import	biological_process	12	1	210	5	20711	0.0496847
GO:0007315	pole plasm assembly	biological_process	6	1	210	5	20711	0.0496847
GO:0042059	negative regulation of epidermal growth factor receptor signaling pathway	biological_process	10	2	210	36	20711	0.0514596
GO:0009725	response to hormone	biological_process	5	2	210	37	20711	0.0540461
GO:0008593	regulation of Notch signaling pathway	biological_process	8	2	210	38	20711	0.0566777
GO:0035212	cell competition in a multicellular organism	biological_process	4	1	210	6	20711	0.0593228
GO:1903354	regulation of distal tip cell migration	biological_process	8	1	210	6	20711	0.0593228
GO:0046693	sperm storage	biological_process	6	1	210	6	20711	0.0593228
GO:0042306	regulation of protein import into nucleus	biological_process	9	1	210	6	20711	0.0593228
GO:1902430	negative regulation of amyloid-beta formation	biological_process	9	1	210	6	20711	0.0593228
GO:0007509	mesoderm migration involved in gastrulation	biological_process	9	1	210	6	20711	0.0593228
GO:0034453	microtubule anchoring	biological_process	8	1	210	6	20711	0.0593228
GO:0090254	cell elongation involved in imaginal disc-derived wing morphogenesis	biological_process	8	1	210	6	20711	0.0593228
GO:1904799	regulation of neuron remodeling	biological_process	11	1	210	6	20711	0.0593228
GO:0061333	renal tubule morphogenesis	biological_process	8	1	210	6	20711	0.0593228
GO:0007482	haltere development	biological_process	7	1	210	6	20711	0.0593228
GO:2000274	regulation of epithelial cell migration, open tracheal system	biological_process	9	1	210	6	20711	0.0593228
GO:0007295	growth of a germarium-derived egg chamber	biological_process	5	1	210	6	20711	0.0593228
GO:0016577	histone demethylation	biological_process	11	1	210	6	20711	0.0593228
GO:0048103	somatic stem cell division	biological_process	6	1	210	6	20711	0.0593228
GO:0001746	Bolwig's organ morphogenesis	biological_process	8	1	210	6	20711	0.0593228
GO:0010761	fibroblast migration	biological_process	8	1	210	6	20711	0.0593228
GO:0007309	oocyte axis specification	biological_process	5	1	210	6	20711	0.0593228
GO:0007522	visceral muscle development	biological_process	7	1	210	6	20711	0.0593228
GO:0033169	histone H3-K9 demethylation	biological_process	13	1	210	6	20711	0.0593228
GO:0006536	glutamate metabolic process	biological_process	11	1	210	6	20711	0.0593228
GO:0035239	tube morphogenesis	biological_process	5	1	210	6	20711	0.0593228
GO:0032331	negative regulation of chondrocyte differentiation	biological_process	8	1	210	6	20711	0.0593228
GO:0051569	regulation of histone H3-K4 methylation	biological_process	11	1	210	6	20711	0.0593228
GO:0043137	DNA replication, removal of RNA primer	biological_process	8	1	210	6	20711	0.0593228
GO:1902966	positive regulation of protein localization to early endosome	biological_process	10	1	210	6	20711	0.0593228
GO:0016204	determination of muscle attachment site	biological_process	6	1	210	6	20711	0.0593228
GO:0051592	response to calcium ion	biological_process	7	2	210	39	20711	0.0593533
GO:1901215	negative regulation of neuron death	biological_process	8	2	210	40	20711	0.0620716
GO:0048488	synaptic vesicle endocytosis	biological_process	9	2	210	42	20711	0.0676322
GO:0071222	cellular response to lipopolysaccharide	biological_process	8	2	210	42	20711	0.0676322
GO:0016336	establishment or maintenance of polarity of larval imaginal disc epithelium	biological_process	5	1	210	7	20711	0.0688636
GO:0007523	larval visceral muscle development	biological_process	8	1	210	7	20711	0.0688636
GO:0051918	negative regulation of fibrinolysis	biological_process	9	1	210	7	20711	0.0688636
GO:0060394	negative regulation of pathway-restricted SMAD protein phosphorylation	biological_process	11	1	210	7	20711	0.0688636
GO:0042953	lipoprotein transport	biological_process	10	1	210	7	20711	0.0688636
GO:0048082	regulation of adult chitin-containing cuticle pigmentation	biological_process	8	1	210	7	20711	0.0688636
GO:0045175	basal protein localization	biological_process	6	1	210	7	20711	0.0688636
GO:0072347	response to anesthetic	biological_process	6	1	210	7	20711	0.0688636
GO:2000352	negative regulation of endothelial cell apoptotic process	biological_process	11	1	210	7	20711	0.0688636
GO:0031034	myosin filament assembly	biological_process	9	1	210	7	20711	0.0688636
GO:0048542	lymph gland development	biological_process	7	1	210	7	20711	0.0688636
GO:0007451	dorsal/ventral lineage restriction, imaginal disc	biological_process	6	1	210	7	20711	0.0688636
GO:0040037	negative regulation of fibroblast growth factor receptor signaling pathway	biological_process	9	1	210	7	20711	0.0688636
GO:0045445	myoblast differentiation	biological_process	6	1	210	7	20711	0.0688636
GO:0045823	positive regulation of heart contraction	biological_process	9	1	210	7	20711	0.0688636
GO:0006561	proline biosynthetic process	biological_process	12	1	210	7	20711	0.0688636
GO:0031114	regulation of microtubule depolymerization	biological_process	9	1	210	7	20711	0.0688636
GO:0016332	establishment or maintenance of polarity of embryonic epithelium	biological_process	5	1	210	7	20711	0.0688636
GO:1902667	regulation of axon guidance	biological_process	10	1	210	7	20711	0.0688636
GO:2000279	negative regulation of DNA biosynthetic process	biological_process	9	1	210	7	20711	0.0688636
GO:0060052	neurofilament cytoskeleton organization	biological_process	8	1	210	7	20711	0.0688636
GO:0045664	regulation of neuron differentiation	biological_process	9	1	210	7	20711	0.0688636
GO:0048843	negative regulation of axon extension involved in axon guidance	biological_process	9	1	210	7	20711	0.0688636
GO:0030589	pseudocleavage involved in syncytial blastoderm formation	biological_process	5	1	210	7	20711	0.0688636
GO:0035293	chitin-based larval cuticle pattern formation	biological_process	7	1	210	7	20711	0.0688636
GO:0007274	neuromuscular synaptic transmission	biological_process	10	2	210	44	20711	0.0733504
GO:0006537	glutamate biosynthetic process	biological_process	12	1	210	8	20711	0.078308
GO:0070863	positive regulation of protein exit from endoplasmic reticulum	biological_process	10	1	210	8	20711	0.078308
GO:0045662	negative regulation of myoblast differentiation	biological_process	8	1	210	8	20711	0.078308
GO:0016043	cellular component organization	biological_process	4	1	210	8	20711	0.078308
GO:0090026	positive regulation of monocyte chemotaxis	biological_process	9	1	210	8	20711	0.078308
GO:0007318	pole plasm protein localization	biological_process	6	1	210	8	20711	0.078308
GO:0006069	ethanol oxidation	biological_process	8	1	210	8	20711	0.078308
GO:0042058	regulation of epidermal growth factor receptor signaling pathway	biological_process	9	1	210	8	20711	0.078308
GO:0007527	adult somatic muscle development	biological_process	7	1	210	8	20711	0.078308
GO:0043517	positive regulation of DNA damage response, signal transduction by p53 class mediator	biological_process	11	1	210	8	20711	0.078308
GO:0007591	molting cycle, chitin-based cuticle	biological_process	5	1	210	8	20711	0.078308
GO:0097120	receptor localization to synapse	biological_process	7	1	210	8	20711	0.078308
GO:2001137	positive regulation of endocytic recycling	biological_process	9	1	210	8	20711	0.078308
GO:0006817	phosphate ion transport	biological_process	9	1	210	8	20711	0.078308
GO:0010259	multicellular organism aging	biological_process	5	1	210	8	20711	0.078308
GO:0015909	long-chain fatty acid transport	biological_process	9	1	210	8	20711	0.078308
GO:0045663	positive regulation of myoblast differentiation	biological_process	8	1	210	8	20711	0.078308
GO:2000766	negative regulation of cytoplasmic translation	biological_process	11	1	210	8	20711	0.078308
GO:0015671	oxygen transport	biological_process	7	1	210	8	20711	0.078308
GO:0032757	positive regulation of interleukin-8 production	biological_process	8	1	210	8	20711	0.078308
GO:0051091	positive regulation of DNA binding transcription factor activity	biological_process	6	2	210	46	20711	0.0792179
GO:0016319	mushroom body development	biological_process	5	2	210	46	20711	0.0792179
GO:0007419	ventral cord development	biological_process	6	2	210	47	20711	0.082205
GO:0006123	mitochondrial electron transport, cytochrome c to oxygen	biological_process	10	2	210	47	20711	0.082205
GO:0007498	mesoderm development	biological_process	6	2	210	47	20711	0.082205
GO:0001701	in utero embryonic development	biological_process	8	3	210	102	20711	0.085308
GO:0007411	axon guidance	biological_process	6	4	210	165	20711	0.0874213
GO:0035152	regulation of tube architecture, open tracheal system	biological_process	5	1	210	9	20711	0.0876572
GO:0047496	vesicle transport along microtubule	biological_process	10	1	210	9	20711	0.0876572
GO:0050873	brown fat cell differentiation	biological_process	7	1	210	9	20711	0.0876572
GO:0007111	meiosis II cytokinesis	biological_process	8	1	210	9	20711	0.0876572
GO:0051965	positive regulation of synapse assembly	biological_process	7	1	210	9	20711	0.0876572
GO:0090287	regulation of cellular response to growth factor stimulus	biological_process	6	1	210	9	20711	0.0876572
GO:0048644	muscle organ morphogenesis	biological_process	6	1	210	9	20711	0.0876572
GO:0071385	cellular response to glucocorticoid stimulus	biological_process	9	1	210	9	20711	0.0876572
GO:0032370	positive regulation of lipid transport	biological_process	8	1	210	9	20711	0.0876572
GO:0030194	positive regulation of blood coagulation	biological_process	8	1	210	9	20711	0.0876572
GO:0031935	regulation of chromatin silencing	biological_process	9	1	210	9	20711	0.0876572
GO:0016333	morphogenesis of follicular epithelium	biological_process	7	1	210	9	20711	0.0876572
GO:0003281	ventricular septum development	biological_process	6	1	210	9	20711	0.0876572
GO:0045109	intermediate filament organization	biological_process	8	1	210	9	20711	0.0876572
GO:0090263	positive regulation of canonical Wnt signaling pathway	biological_process	10	2	210	49	20711	0.0882808
GO:0070588	calcium ion transmembrane transport	biological_process	11	2	210	50	20711	0.0913676
GO:0035023	regulation of Rho protein signal transduction	biological_process	11	2	210	51	20711	0.0944856
GO:0072553	terminal button organization	biological_process	6	1	210	10	20711	0.0969119
GO:2000737	negative regulation of stem cell differentiation	biological_process	8	1	210	10	20711	0.0969119
GO:0046622	positive regulation of organ growth	biological_process	8	1	210	10	20711	0.0969119
GO:0045610	regulation of hemocyte differentiation	biological_process	6	1	210	10	20711	0.0969119
GO:0045088	regulation of innate immune response	biological_process	7	1	210	10	20711	0.0969119
GO:0048863	stem cell differentiation	biological_process	6	1	210	10	20711	0.0969119
GO:0050708	regulation of protein secretion	biological_process	9	1	210	10	20711	0.0969119
GO:0042694	muscle cell fate specification	biological_process	6	1	210	10	20711	0.0969119
GO:0001738	morphogenesis of a polarized epithelium	biological_process	7	1	210	10	20711	0.0969119
GO:0006622	protein targeting to lysosome	biological_process	13	1	210	10	20711	0.0969119
GO:0001569	branching involved in blood vessel morphogenesis	biological_process	7	1	210	10	20711	0.0969119
GO:0042332	gravitaxis	biological_process	6	1	210	10	20711	0.0969119
GO:0051604	protein maturation	biological_process	7	1	210	10	20711	0.0969119
GO:0001657	ureteric bud development	biological_process	7	1	210	10	20711	0.0969119
GO:0030325	adrenal gland development	biological_process	7	1	210	10	20711	0.0969119
GO:0046425	regulation of JAK-STAT cascade	biological_process	9	1	210	10	20711	0.0969119
GO:0042572	retinol metabolic process	biological_process	11	1	210	10	20711	0.0969119
GO:0006468	protein phosphorylation	biological_process	9	8	210	464	20711	0.100938
GO:0001755	neural crest cell migration	biological_process	8	1	210	11	20711	0.106073
GO:0048803	imaginal disc-derived male genitalia morphogenesis	biological_process	8	1	210	11	20711	0.106073
GO:0048514	blood vessel morphogenesis	biological_process	6	1	210	11	20711	0.106073
GO:0008535	respiratory chain complex IV assembly	biological_process	9	1	210	11	20711	0.106073
GO:0036335	intestinal stem cell homeostasis	biological_process	7	1	210	11	20711	0.106073
GO:0009987	cellular process	biological_process	3	1	210	11	20711	0.106073
GO:0043069	negative regulation of programmed cell death	biological_process	8	1	210	11	20711	0.106073
GO:0006081	cellular aldehyde metabolic process	biological_process	5	1	210	11	20711	0.106073
GO:0035994	response to muscle stretch	biological_process	6	1	210	11	20711	0.106073
GO:0060025	regulation of synaptic activity	biological_process	9	1	210	11	20711	0.106073
GO:0035075	response to ecdysone	biological_process	6	1	210	11	20711	0.106073
GO:0030866	cortical actin cytoskeleton organization	biological_process	8	2	210	55	20711	0.107252
GO:0050790	regulation of catalytic activity	biological_process	5	2	210	55	20711	0.107252
GO:0014019	neuroblast development	biological_process	7	1	210	12	20711	0.115142
GO:0008585	female gonad development	biological_process	7	1	210	12	20711	0.115142
GO:0035149	lumen formation, open tracheal system	biological_process	6	1	210	12	20711	0.115142
GO:0014912	negative regulation of smooth muscle cell migration	biological_process	9	1	210	12	20711	0.115142
GO:0071689	muscle thin filament assembly	biological_process	7	1	210	12	20711	0.115142
GO:0042730	fibrinolysis	biological_process	9	1	210	12	20711	0.115142
GO:0006892	post-Golgi vesicle-mediated transport	biological_process	8	1	210	12	20711	0.115142
GO:0009649	entrainment of circadian clock	biological_process	5	1	210	12	20711	0.115142
GO:0007617	mating behavior	biological_process	5	1	210	12	20711	0.115142
GO:0007389	pattern specification process	biological_process	4	1	210	12	20711	0.115142
GO:0035050	embryonic heart tube development	biological_process	6	1	210	12	20711	0.115142
GO:0010951	negative regulation of endopeptidase activity	biological_process	11	2	210	58	20711	0.117111
GO:0008104	protein localization	biological_process	5	3	210	119	20711	0.120558
GO:0086010	membrane depolarization during action potential	biological_process	7	1	210	13	20711	0.124119
GO:0022409	positive regulation of cell-cell adhesion	biological_process	7	1	210	13	20711	0.124119
GO:0015990	electron transport coupled proton transport	biological_process	11	1	210	13	20711	0.124119
GO:0035017	cuticle pattern formation	biological_process	6	1	210	13	20711	0.124119
GO:0048790	maintenance of presynaptic active zone structure	biological_process	7	1	210	13	20711	0.124119
GO:0042438	melanin biosynthetic process	biological_process	8	1	210	13	20711	0.124119
GO:2001237	negative regulation of extrinsic apoptotic signaling pathway	biological_process	10	1	210	13	20711	0.124119
GO:0070544	histone H3-K36 demethylation	biological_process	13	1	210	13	20711	0.124119
GO:0035088	establishment or maintenance of apical/basal cell polarity	biological_process	6	1	210	13	20711	0.124119
GO:0008045	motor neuron axon guidance	biological_process	7	2	210	61	20711	0.127187
GO:0001525	angiogenesis	biological_process	5	3	210	122	20711	0.127263
GO:0007179	transforming growth factor beta receptor signaling pathway	biological_process	8	2	210	62	20711	0.13059
GO:0042127	regulation of cell proliferation	biological_process	6	3	210	124	20711	0.131805
GO:0017157	regulation of exocytosis	biological_process	7	1	210	14	20711	0.133006
GO:0010941	regulation of cell death	biological_process	6	1	210	14	20711	0.133006
GO:0007162	negative regulation of cell adhesion	biological_process	6	1	210	14	20711	0.133006
GO:0030195	negative regulation of blood coagulation	biological_process	8	1	210	14	20711	0.133006
GO:0048705	skeletal system morphogenesis	biological_process	6	1	210	14	20711	0.133006
GO:0007367	segment polarity determination	biological_process	7	1	210	14	20711	0.133006
GO:0033365	protein localization to organelle	biological_process	7	1	210	14	20711	0.133006
GO:0001678	cellular glucose homeostasis	biological_process	9	1	210	14	20711	0.133006
GO:0003382	epithelial cell morphogenesis	biological_process	8	1	210	14	20711	0.133006
GO:0048468	cell development	biological_process	5	1	210	14	20711	0.133006
GO:0051647	nucleus localization	biological_process	6	1	210	14	20711	0.133006
GO:0045597	positive regulation of cell differentiation	biological_process	7	1	210	14	20711	0.133006
GO:0003151	outflow tract morphogenesis	biological_process	5	1	210	14	20711	0.133006
GO:0007156	homophilic cell adhesion via plasma membrane adhesion molecules	biological_process	7	2	210	63	20711	0.134014
GO:0035904	aorta development	biological_process	7	1	210	15	20711	0.141803
GO:0008293	torso signaling pathway	biological_process	8	1	210	15	20711	0.141803
GO:0007426	tracheal outgrowth, open tracheal system	biological_process	6	1	210	15	20711	0.141803
GO:0048167	regulation of synaptic plasticity	biological_process	9	1	210	15	20711	0.141803
GO:0009072	aromatic amino acid family metabolic process	biological_process	9	1	210	15	20711	0.141803
GO:0070507	regulation of microtubule cytoskeleton organization	biological_process	7	1	210	15	20711	0.141803
GO:0036376	sodium ion export across plasma membrane	biological_process	11	1	210	15	20711	0.141803
GO:0009620	response to fungus	biological_process	7	1	210	15	20711	0.141803
GO:0071526	semaphorin-plexin signaling pathway	biological_process	6	1	210	15	20711	0.141803
GO:0030007	cellular potassium ion homeostasis	biological_process	11	1	210	15	20711	0.141803
GO:0045842	positive regulation of mitotic metaphase/anaphase transition	biological_process	12	1	210	15	20711	0.141803
GO:0035158	regulation of tube diameter, open tracheal system	biological_process	9	1	210	15	20711	0.141803
GO:0051924	regulation of calcium ion transport	biological_process	9	1	210	15	20711	0.141803
GO:0060976	coronary vasculature development	biological_process	6	1	210	15	20711	0.141803
GO:0040034	regulation of development, heterochronic	biological_process	6	1	210	16	20711	0.150511
GO:0030048	actin filament-based movement	biological_process	5	1	210	16	20711	0.150511
GO:0007097	nuclear migration	biological_process	7	1	210	16	20711	0.150511
GO:0030539	male genitalia development	biological_process	7	1	210	16	20711	0.150511
GO:0010469	regulation of receptor activity	biological_process	8	1	210	16	20711	0.150511
GO:1902042	negative regulation of extrinsic apoptotic signaling pathway via death domain receptors	biological_process	11	1	210	16	20711	0.150511
GO:1903507	negative regulation of nucleic acid-templated transcription	biological_process	10	1	210	16	20711	0.150511
GO:0040002	collagen and cuticulin-based cuticle development	biological_process	6	1	210	16	20711	0.150511
GO:0048749	compound eye development	biological_process	8	2	210	70	20711	0.158507
GO:0048067	cuticle pigmentation	biological_process	5	1	210	17	20711	0.159131
GO:0045053	protein retention in Golgi apparatus	biological_process	7	1	210	17	20711	0.159131
GO:0071300	cellular response to retinoic acid	biological_process	7	1	210	17	20711	0.159131
GO:0050896	response to stimulus	biological_process	3	1	210	17	20711	0.159131
GO:0030510	regulation of BMP signaling pathway	biological_process	10	1	210	17	20711	0.159131
GO:0008610	lipid biosynthetic process	biological_process	6	1	210	17	20711	0.159131
GO:0060021	palate development	biological_process	5	1	210	17	20711	0.159131
GO:0007016	cytoskeletal anchoring at plasma membrane	biological_process	7	1	210	17	20711	0.159131
GO:0050729	positive regulation of inflammatory response	biological_process	9	1	210	17	20711	0.159131
GO:0008088	axo-dendritic transport	biological_process	9	1	210	17	20711	0.159131
GO:0035690	cellular response to drug	biological_process	6	1	210	17	20711	0.159131
GO:0007552	metamorphosis	biological_process	5	1	210	17	20711	0.159131
GO:0010884	positive regulation of lipid storage	biological_process	6	1	210	17	20711	0.159131
GO:0007476	imaginal disc-derived wing morphogenesis	biological_process	7	2	210	72	20711	0.165652
GO:0045879	negative regulation of smoothened signaling pathway	biological_process	9	1	210	18	20711	0.167664
GO:0071711	basement membrane organization	biological_process	7	1	210	18	20711	0.167664
GO:0007427	epithelial cell migration, open tracheal system	biological_process	9	1	210	18	20711	0.167664
GO:0060325	face morphogenesis	biological_process	5	1	210	18	20711	0.167664
GO:0001700	embryonic development via the syncytial blastoderm	biological_process	7	1	210	18	20711	0.167664
GO:0006110	regulation of glycolytic process	biological_process	10	1	210	18	20711	0.167664
GO:0007143	female meiotic nuclear division	biological_process	5	1	210	18	20711	0.167664
GO:0007629	flight behavior	biological_process	6	1	210	18	20711	0.167664
GO:0008345	larval locomotory behavior	biological_process	5	1	210	18	20711	0.167664
GO:0050768	negative regulation of neurogenesis	biological_process	9	1	210	18	20711	0.167664
GO:0006883	cellular sodium ion homeostasis	biological_process	11	1	210	18	20711	0.167664
GO:0002062	chondrocyte differentiation	biological_process	6	1	210	18	20711	0.167664
GO:0070536	protein K63-linked deubiquitination	biological_process	10	1	210	18	20711	0.167664
GO:0035914	skeletal muscle cell differentiation	biological_process	6	1	210	18	20711	0.167664
GO:0045595	regulation of cell differentiation	biological_process	6	1	210	19	20711	0.176111
GO:0048008	platelet-derived growth factor receptor signaling pathway	biological_process	8	1	210	19	20711	0.176111
GO:0051493	regulation of cytoskeleton organization	biological_process	8	1	210	19	20711	0.176111
GO:0007271	synaptic transmission, cholinergic	biological_process	10	1	210	19	20711	0.176111
GO:0043113	receptor clustering	biological_process	6	1	210	19	20711	0.176111
GO:0006869	lipid transport	biological_process	7	2	210	76	20711	0.180102
GO:0007268	chemical synaptic transmission	biological_process	9	2	210	77	20711	0.183745
GO:0007051	spindle organization	biological_process	8	1	210	20	20711	0.184472
GO:0035317	imaginal disc-derived wing hair organization	biological_process	8	1	210	20	20711	0.184472
GO:0035329	hippo signaling	biological_process	6	1	210	20	20711	0.184472
GO:0050803	regulation of synapse structure or activity	biological_process	5	1	210	20	20711	0.184472
GO:0007599	hemostasis	biological_process	6	1	210	20	20711	0.184472
GO:0060429	epithelium development	biological_process	6	1	210	20	20711	0.184472
GO:0008587	imaginal disc-derived wing margin morphogenesis	biological_process	6	1	210	20	20711	0.184472
GO:0031589	cell-substrate adhesion	biological_process	5	1	210	21	20711	0.192749
GO:0008217	regulation of blood pressure	biological_process	5	1	210	21	20711	0.192749
GO:0044719	regulation of imaginal disc-derived wing size	biological_process	6	1	210	21	20711	0.192749
GO:0030010	establishment of cell polarity	biological_process	5	1	210	21	20711	0.192749
GO:0007525	somatic muscle development	biological_process	6	1	210	21	20711	0.192749
GO:0030162	regulation of proteolysis	biological_process	8	1	210	21	20711	0.192749
GO:0030322	stabilization of membrane potential	biological_process	6	1	210	21	20711	0.192749
GO:0042048	olfactory behavior	biological_process	5	1	210	21	20711	0.192749
GO:0007026	negative regulation of microtubule depolymerization	biological_process	10	1	210	21	20711	0.192749
GO:0016310	phosphorylation	biological_process	7	5	210	303	20711	0.19501
GO:0010468	regulation of gene expression	biological_process	7	3	210	151	20711	0.197934
GO:0007009	plasma membrane organization	biological_process	6	1	210	22	20711	0.200943
GO:0007413	axonal fasciculation	biological_process	6	1	210	22	20711	0.200943
GO:0019941	modification-dependent protein catabolic process	biological_process	9	1	210	22	20711	0.200943
GO:0001570	vasculogenesis	biological_process	6	1	210	22	20711	0.200943
GO:0045886	negative regulation of synaptic growth at neuromuscular junction	biological_process	8	1	210	22	20711	0.200943
GO:0006937	regulation of muscle contraction	biological_process	8	1	210	22	20711	0.200943
GO:0006541	glutamine metabolic process	biological_process	11	1	210	22	20711	0.200943
GO:0007423	sensory organ development	biological_process	6	1	210	22	20711	0.200943
GO:0016358	dendrite development	biological_process	8	1	210	22	20711	0.200943
GO:0030216	keratinocyte differentiation	biological_process	8	1	210	23	20711	0.209054
GO:0007430	terminal branching, open tracheal system	biological_process	8	1	210	23	20711	0.209054
GO:0071356	cellular response to tumor necrosis factor	biological_process	8	1	210	23	20711	0.209054
GO:0007424	open tracheal system development	biological_process	7	2	210	84	20711	0.209511
GO:0016311	dephosphorylation	biological_process	7	2	210	85	20711	0.213223
GO:0007291	sperm individualization	biological_process	5	1	210	24	20711	0.217082
GO:0016322	neuron remodeling	biological_process	7	1	210	24	20711	0.217082
GO:0046843	dorsal appendage formation	biological_process	5	1	210	24	20711	0.217082
GO:1902036	regulation of hematopoietic stem cell differentiation	biological_process	8	1	210	24	20711	0.217082
GO:0048477	oogenesis	biological_process	6	3	210	159	20711	0.218878
GO:0007160	cell-matrix adhesion	biological_process	6	2	210	87	20711	0.220666
GO:0044331	cell-cell adhesion mediated by cadherin	biological_process	6	1	210	25	20711	0.22503
GO:0046426	negative regulation of JAK-STAT cascade	biological_process	10	1	210	25	20711	0.22503
GO:0048025	negative regulation of mRNA splicing, via spliceosome	biological_process	10	1	210	25	20711	0.22503
GO:0071347	cellular response to interleukin-1	biological_process	8	1	210	25	20711	0.22503
GO:0007612	learning	biological_process	5	1	210	25	20711	0.22503
GO:0048085	adult chitin-containing cuticle pigmentation	biological_process	6	1	210	25	20711	0.22503
GO:0071480	cellular response to gamma radiation	biological_process	8	1	210	25	20711	0.22503
GO:0050829	defense response to Gram-negative bacterium	biological_process	9	2	210	89	20711	0.228131
GO:0048190	wing disc dorsal/ventral pattern formation	biological_process	8	1	210	26	20711	0.232897
GO:0043171	peptide catabolic process	biological_process	8	1	210	26	20711	0.232897
GO:0022900	electron transport chain	biological_process	6	1	210	26	20711	0.232897
GO:0009314	response to radiation	biological_process	5	1	210	26	20711	0.232897
GO:0000281	mitotic cytokinesis	biological_process	7	2	210	92	20711	0.239359
GO:0040011	locomotion	biological_process	3	2	210	92	20711	0.239359
GO:0006090	pyruvate metabolic process	biological_process	9	1	210	27	20711	0.240685
GO:0009653	anatomical structure morphogenesis	biological_process	4	1	210	27	20711	0.240685
GO:0008595	anterior/posterior axis specification, embryo	biological_process	7	1	210	28	20711	0.248394
GO:0007474	imaginal disc-derived wing vein specification	biological_process	6	1	210	28	20711	0.248394
GO:0048738	cardiac muscle tissue development	biological_process	8	1	210	28	20711	0.248394
GO:0019233	sensory perception of pain	biological_process	7	1	210	28	20711	0.248394
GO:0032870	cellular response to hormone stimulus	biological_process	6	1	210	28	20711	0.248394
GO:0007368	determination of left/right symmetry	biological_process	7	1	210	28	20711	0.248394
GO:0010628	positive regulation of gene expression	biological_process	8	3	210	172	20711	0.253786
GO:0022008	neurogenesis	biological_process	6	1	210	29	20711	0.256026
GO:0008354	germ cell migration	biological_process	7	1	210	29	20711	0.256026
GO:0007601	visual perception	biological_process	8	1	210	29	20711	0.256026
GO:0035159	regulation of tube length, open tracheal system	biological_process	8	1	210	29	20711	0.256026
GO:0045089	positive regulation of innate immune response	biological_process	8	1	210	29	20711	0.256026
GO:0071333	cellular response to glucose stimulus	biological_process	10	1	210	29	20711	0.256026
GO:0060070	canonical Wnt signaling pathway	biological_process	8	1	210	29	20711	0.256026
GO:0008283	cell proliferation	biological_process	3	3	210	175	20711	0.261958
GO:0045887	positive regulation of synaptic growth at neuromuscular junction	biological_process	8	1	210	30	20711	0.26358
GO:0045167	asymmetric protein localization involved in cell fate determination	biological_process	6	1	210	30	20711	0.26358
GO:0007480	imaginal disc-derived leg morphogenesis	biological_process	7	1	210	30	20711	0.26358
GO:0016318	ommatidial rotation	biological_process	5	1	210	30	20711	0.26358
GO:0045494	photoreceptor cell maintenance	biological_process	4	1	210	30	20711	0.26358
GO:0032091	negative regulation of protein binding	biological_process	7	1	210	30	20711	0.26358
GO:0046580	negative regulation of Ras protein signal transduction	biological_process	11	1	210	31	20711	0.271057
GO:0009790	embryo development	biological_process	5	1	210	31	20711	0.271057
GO:0016203	muscle attachment	biological_process	4	1	210	31	20711	0.271057
GO:0006820	anion transport	biological_process	7	1	210	31	20711	0.271057
GO:0008361	regulation of cell size	biological_process	6	1	210	31	20711	0.271057
GO:0002009	morphogenesis of an epithelium	biological_process	6	1	210	32	20711	0.27846
GO:0043401	steroid hormone mediated signaling pathway	biological_process	6	1	210	32	20711	0.27846
GO:0042593	glucose homeostasis	biological_process	8	1	210	32	20711	0.27846
GO:0030100	regulation of endocytosis	biological_process	7	1	210	32	20711	0.27846
GO:0016339	calcium-dependent cell-cell adhesion via plasma membrane cell adhesion molecules	biological_process	7	1	210	32	20711	0.27846
GO:0006099	tricarboxylic acid cycle	biological_process	5	2	210	103	20711	0.280671
GO:0008347	glial cell migration	biological_process	7	1	210	33	20711	0.285787
GO:0042752	regulation of circadian rhythm	biological_process	5	1	210	33	20711	0.285787
GO:0046854	phosphatidylinositol phosphorylation	biological_process	10	1	210	33	20711	0.285787
GO:0002121	inter-male aggressive behavior	biological_process	6	1	210	33	20711	0.285787
GO:0034097	response to cytokine	biological_process	6	1	210	33	20711	0.285787
GO:0006730	one-carbon metabolic process	biological_process	5	1	210	34	20711	0.29304
GO:0018107	peptidyl-threonine phosphorylation	biological_process	10	1	210	34	20711	0.29304
GO:0051591	response to cAMP	biological_process	8	1	210	34	20711	0.29304
GO:0071260	cellular response to mechanical stimulus	biological_process	6	1	210	35	20711	0.30022
GO:0071560	cellular response to transforming growth factor beta stimulus	biological_process	8	1	210	35	20711	0.30022
GO:0022416	chaeta development	biological_process	7	1	210	36	20711	0.307328
GO:0042632	cholesterol homeostasis	biological_process	9	1	210	37	20711	0.314364
GO:0030178	negative regulation of Wnt signaling pathway	biological_process	9	1	210	37	20711	0.314364
GO:0008584	male gonad development	biological_process	7	1	210	37	20711	0.314364
GO:0006814	sodium ion transport	biological_process	9	1	210	37	20711	0.314364
GO:0009612	response to mechanical stimulus	biological_process	5	1	210	37	20711	0.314364
GO:0030336	negative regulation of cell migration	biological_process	8	1	210	38	20711	0.321328
GO:0035264	multicellular organism growth	biological_process	4	1	210	38	20711	0.321328
GO:0006839	mitochondrial transport	biological_process	6	1	210	38	20711	0.321328
GO:0045747	positive regulation of Notch signaling pathway	biological_process	9	1	210	39	20711	0.328222
GO:0009968	negative regulation of signal transduction	biological_process	8	1	210	39	20711	0.328222
GO:0008286	insulin receptor signaling pathway	biological_process	8	1	210	39	20711	0.328222
GO:0022904	respiratory electron transport chain	biological_process	7	1	210	40	20711	0.335046
GO:0035262	gonad morphogenesis	biological_process	5	1	210	42	20711	0.348489
GO:0006812	cation transport	biological_process	7	1	210	42	20711	0.348489
GO:0046034	ATP metabolic process	biological_process	4	1	210	42	20711	0.348489
GO:0019991	septate junction assembly	biological_process	9	1	210	42	20711	0.348489
GO:0051726	regulation of cell cycle	biological_process	6	2	210	122	20711	0.351385
GO:0006997	nucleus organization	biological_process	6	1	210	43	20711	0.355108
GO:0007224	smoothened signaling pathway	biological_process	6	1	210	43	20711	0.355108
GO:0030182	neuron differentiation	biological_process	6	1	210	43	20711	0.355108
GO:0033627	cell adhesion mediated by integrin	biological_process	5	1	210	43	20711	0.355108
GO:0030097	hemopoiesis	biological_process	7	1	210	43	20711	0.355108
GO:0007286	spermatid development	biological_process	6	1	210	44	20711	0.361661
GO:0002576	platelet degranulation	biological_process	9	1	210	44	20711	0.361661
GO:0032504	multicellular organism reproduction	biological_process	4	1	210	44	20711	0.361661
GO:0043086	negative regulation of catalytic activity	biological_process	6	1	210	45	20711	0.368147
GO:0090502	RNA phosphodiester bond hydrolysis, endonucleolytic	biological_process	10	1	210	46	20711	0.374568
GO:0042273	ribosomal large subunit biogenesis	biological_process	6	1	210	46	20711	0.374568
GO:0046331	lateral inhibition	biological_process	7	2	210	129	20711	0.376893
GO:0006909	phagocytosis	biological_process	7	2	210	130	20711	0.380505
GO:0040014	regulation of multicellular organism growth	biological_process	7	1	210	47	20711	0.380923
GO:0006094	gluconeogenesis	biological_process	9	1	210	47	20711	0.380923
GO:0034446	substrate adhesion-dependent cell spreading	biological_process	8	1	210	47	20711	0.380923
GO:0016055	Wnt signaling pathway	biological_process	7	2	210	131	20711	0.384107
GO:0006950	response to stress	biological_process	4	1	210	48	20711	0.387215
GO:0061024	membrane organization	biological_process	5	1	210	50	20711	0.399607
GO:0016573	histone acetylation	biological_process	10	1	210	50	20711	0.399607
GO:0001764	neuron migration	biological_process	7	1	210	51	20711	0.40571
GO:0051259	protein complex oligomerization	biological_process	7	1	210	51	20711	0.40571
GO:0044267	cellular protein metabolic process	biological_process	7	1	210	52	20711	0.411751
GO:0030431	sleep	biological_process	4	1	210	53	20711	0.41773
GO:0042594	response to starvation	biological_process	5	1	210	53	20711	0.41773
GO:0001822	kidney development	biological_process	6	1	210	53	20711	0.41773
GO:0010976	positive regulation of neuron projection development	biological_process	11	1	210	54	20711	0.423649
GO:0050808	synapse organization	biological_process	5	1	210	54	20711	0.423649
GO:0031532	actin cytoskeleton reorganization	biological_process	8	1	210	54	20711	0.423649
GO:0071230	cellular response to amino acid stimulus	biological_process	7	1	210	54	20711	0.423649
GO:0006816	calcium ion transport	biological_process	10	1	210	57	20711	0.44105
GO:0006414	translational elongation	biological_process	8	1	210	57	20711	0.44105
GO:0007169	transmembrane receptor protein tyrosine kinase signaling pathway	biological_process	7	1	210	59	20711	0.452358
GO:0032436	positive regulation of proteasomal ubiquitin-dependent protein catabolic process	biological_process	12	1	210	60	20711	0.457927
GO:0032496	response to lipopolysaccharide	biological_process	7	1	210	61	20711	0.463439
GO:0001708	cell fate specification	biological_process	5	1	210	61	20711	0.463439
GO:0000045	autophagosome assembly	biological_process	7	1	210	62	20711	0.468896
GO:0007163	establishment or maintenance of cell polarity	biological_process	4	1	210	62	20711	0.468896
GO:0007517	muscle organ development	biological_process	6	1	210	63	20711	0.474297
GO:0030308	negative regulation of cell growth	biological_process	7	1	210	63	20711	0.474297
GO:0007281	germ cell development	biological_process	5	1	210	64	20711	0.479644
GO:0009058	biosynthetic process	biological_process	4	1	210	64	20711	0.479644
GO:0006367	transcription initiation from RNA polymerase II promoter	biological_process	9	1	210	64	20711	0.479644
GO:0007346	regulation of mitotic cell cycle	biological_process	7	1	210	65	20711	0.484936
GO:0000132	establishment of mitotic spindle orientation	biological_process	10	1	210	65	20711	0.484936
GO:0005975	carbohydrate metabolic process	biological_process	5	2	210	161	20711	0.4873
GO:0043524	negative regulation of neuron apoptotic process	biological_process	10	1	210	66	20711	0.490175
GO:0007391	dorsal closure	biological_process	8	1	210	66	20711	0.490175
GO:0016477	cell migration	biological_process	6	2	210	163	20711	0.493798
GO:0045766	positive regulation of angiogenesis	biological_process	8	1	210	67	20711	0.495361
GO:0006357	regulation of transcription by RNA polymerase II	biological_process	9	4	210	360	20711	0.497298
GO:0006464	cellular protein modification process	biological_process	8	1	210	68	20711	0.500495
GO:0006635	fatty acid beta-oxidation	biological_process	11	1	210	69	20711	0.505576
GO:0008285	negative regulation of cell proliferation	biological_process	7	2	210	167	20711	0.506638
GO:0042742	defense response to bacterium	biological_process	8	1	210	70	20711	0.510606
GO:0042542	response to hydrogen peroxide	biological_process	7	1	210	70	20711	0.510606
GO:0006120	mitochondrial electron transport, NADH to ubiquinone	biological_process	8	1	210	70	20711	0.510606
GO:0055085	transmembrane transport	biological_process	6	3	210	271	20711	0.520118
GO:0007219	Notch signaling pathway	biological_process	6	1	210	72	20711	0.520514
GO:0000902	cell morphogenesis	biological_process	6	1	210	75	20711	0.535002
GO:0006355	regulation of transcription, DNA-templated	biological_process	8	8	210	783	20711	0.541739
GO:0007017	microtubule-based process	biological_process	4	1	210	77	20711	0.544418
GO:0015991	ATP hydrolysis coupled proton transport	biological_process	11	1	210	77	20711	0.544418
GO:0007417	central nervous system development	biological_process	6	1	210	79	20711	0.553645
GO:0030154	cell differentiation	biological_process	5	3	210	293	20711	0.572932
GO:0051260	protein homooligomerization	biological_process	8	1	210	85	20711	0.580223
GO:0006979	response to oxidative stress	biological_process	5	2	210	192	20711	0.58196
GO:0008284	positive regulation of cell proliferation	biological_process	7	2	210	195	20711	0.590412
GO:0001934	positive regulation of protein phosphorylation	biological_process	10	1	210	90	20711	0.601163
GO:0006898	receptor-mediated endocytosis	biological_process	8	1	210	90	20711	0.601163
GO:0042060	wound healing	biological_process	6	1	210	91	20711	0.605225
GO:0000226	microtubule cytoskeleton organization	biological_process	7	1	210	91	20711	0.605225
GO:0061077	chaperone-mediated protein folding	biological_process	5	1	210	91	20711	0.605225
GO:0000398	mRNA splicing, via spliceosome	biological_process	13	3	210	314	20711	0.619867
GO:0048812	neuron projection morphogenesis	biological_process	8	1	210	96	20711	0.624924
GO:0006096	glycolytic process	biological_process	10	1	210	99	20711	0.636271
GO:0007420	brain development	biological_process	6	1	210	100	20711	0.639976
GO:0008152	metabolic process	biological_process	3	3	210	325	20711	0.643022
GO:0006974	cellular response to DNA damage stimulus	biological_process	6	2	210	216	20711	0.646029
GO:0007155	cell adhesion	biological_process	4	2	210	216	20711	0.646029
GO:0030335	positive regulation of cell migration	biological_process	8	1	210	102	20711	0.647276
GO:0000278	mitotic cell cycle	biological_process	5	1	210	104	20711	0.654427
GO:0007568	aging	biological_process	4	1	210	107	20711	0.664886
GO:0046777	protein autophosphorylation	biological_process	10	1	210	107	20711	0.664886
GO:0007166	cell surface receptor signaling pathway	biological_process	5	1	210	107	20711	0.664886
GO:0008150	biological_process	biological_process	2	6	210	668	20711	0.674573
GO:0009408	response to heat	biological_process	5	1	210	110	20711	0.675029
GO:0045892	negative regulation of transcription, DNA-templated	biological_process	9	2	210	230	20711	0.679693
GO:0006417	regulation of translation	biological_process	9	1	210	114	20711	0.688079
GO:0006955	immune response	biological_process	4	1	210	116	20711	0.694407
GO:0001666	response to hypoxia	biological_process	5	1	210	122	20711	0.712635
GO:0008360	regulation of cell shape	biological_process	8	1	210	123	20711	0.715566
GO:0006396	RNA processing	biological_process	9	1	210	126	20711	0.724182
GO:0016579	protein deubiquitination	biological_process	9	1	210	128	20711	0.729781
GO:0006508	proteolysis	biological_process	7	4	210	492	20711	0.738168
GO:0006470	protein dephosphorylation	biological_process	9	1	210	133	20711	0.743288
GO:0042493	response to drug	biological_process	5	1	210	147	20711	0.777639
GO:0010629	negative regulation of gene expression	biological_process	8	1	210	149	20711	0.782157
GO:0009792	embryo development ending in birth or egg hatching	biological_process	6	2	210	288	20711	0.792253
GO:0016567	protein ubiquitination	biological_process	11	2	210	290	20711	0.79543
GO:0006260	DNA replication	biological_process	8	1	210	159	20711	0.803415
GO:0007186	G-protein coupled receptor signaling pathway	biological_process	5	1	210	161	20711	0.807412
GO:0006413	translational initiation	biological_process	5	1	210	163	20711	0.811328
GO:0006366	transcription by RNA polymerase II	biological_process	9	1	210	163	20711	0.811328
GO:0007275	multicellular organism development	biological_process	4	3	210	432	20711	0.816951
GO:0043066	negative regulation of apoptotic process	biological_process	9	2	210	325	20711	0.84446
GO:0043065	positive regulation of apoptotic process	biological_process	9	1	210	188	20711	0.854082
GO:0006511	ubiquitin-dependent protein catabolic process	biological_process	10	1	210	197	20711	0.866985
GO:0006351	transcription, DNA-templated	biological_process	8	4	210	634	20711	0.888139
GO:0043161	proteasome-mediated ubiquitin-dependent protein catabolic process	biological_process	11	1	210	228	20711	0.903336
GO:0043547	positive regulation of GTPase activity	biological_process	8	1	210	235	20711	0.910064
GO:0016192	vesicle-mediated transport	biological_process	6	1	210	236	20711	0.910986
GO:0006915	apoptotic process	biological_process	6	1	210	250	20711	0.922953
GO:0006457	protein folding	biological_process	4	1	210	270	20711	0.937323
GO:0055114	oxidation-reduction process	biological_process	4	5	210	900	20711	0.953411
GO:0015031	protein transport	biological_process	9	1	210	309	20711	0.958117
GO:0006810	transport	biological_process	5	1	210	398	20711	0.983356
GO:0006412	translation	biological_process	8	1	210	567	20711	0.997147

## Sheet: cellular component
GO_ID	GO_Term	GO_Function	GO_Level	S gene number	TS gene number	B gene number	TB gene number	pvalue
GO:0030018	Z disc	cellular_component	5	14	210	112	20711	7.88036e-12
GO:0031430	M band	cellular_component	5	8	210	46	20711	1.83265e-08
GO:0005859	muscle myosin complex	cellular_component	6	6	210	21	20711	4.83553e-08
GO:0030016	myofibril	cellular_component	7	6	210	31	20711	6.02897e-07
GO:0031674	I band	cellular_component	5	5	210	27	20711	6.87886e-06
GO:0031672	A band	cellular_component	5	5	210	31	20711	1.40081e-05
GO:0005865	striated muscle thin filament	cellular_component	6	5	210	33	20711	1.92471e-05
GO:0045277	respiratory chain complex IV	cellular_component	5	4	210	19	20711	3.53313e-05
GO:0005581	collagen trimer	cellular_component	4	6	210	70	20711	7.72883e-05
GO:0031594	neuromuscular junction	cellular_component	4	6	210	72	20711	9.05629e-05
GO:0032982	myosin filament	cellular_component	5	3	210	11	20711	0.000159687
GO:0005604	basement membrane	cellular_component	6	6	210	93	20711	0.000370492
GO:0030017	sarcomere	cellular_component	5	4	210	48	20711	0.0014097
GO:0005587	collagen type IV trimer	cellular_component	6	2	210	6	20711	0.00149423
GO:0005920	smooth septate junction	cellular_component	7	2	210	6	20711	0.00149423
GO:0061174	type I terminal bouton	cellular_component	7	2	210	7	20711	0.00207797
GO:0005861	troponin complex	cellular_component	4	2	210	9	20711	0.00351489
GO:0097512	cardiac myofibril	cellular_component	8	2	210	9	20711	0.00351489
GO:0005615	extracellular space	cellular_component	4	17	210	809	20711	0.00374117
GO:0005667	transcription factor complex	cellular_component	4	5	210	119	20711	0.0073428
GO:0033017	sarcoplasmic reticulum membrane	cellular_component	6	2	210	14	20711	0.00859348
GO:0045178	basal part of cell	cellular_component	4	2	210	15	20711	0.0098498
GO:0005751	mitochondrial respiratory chain complex IV	cellular_component	6	3	210	44	20711	0.0100275
GO:0016011	dystroglycan complex	cellular_component	6	1	210	1	20711	0.0101395
GO:0071666	Slit-Robo signaling complex	cellular_component	5	1	210	1	20711	0.0101395
GO:0005576	extracellular region	cellular_component	3	15	210	757	20711	0.0105303
GO:0031012	extracellular matrix	cellular_component	4	7	210	246	20711	0.0129815
GO:1990124	messenger ribonucleoprotein complex	cellular_component	5	2	210	18	20711	0.0140694
GO:0016459	myosin complex	cellular_component	4	3	210	50	20711	0.0141983
GO:0016328	lateral plasma membrane	cellular_component	5	3	210	53	20711	0.0165999
GO:0030139	endocytic vesicle	cellular_component	7	3	210	53	20711	0.0165999
GO:0042734	presynaptic membrane	cellular_component	5	2	210	20	20711	0.0172418
GO:0016327	apicolateral plasma membrane	cellular_component	5	2	210	21	20711	0.018931
GO:0045211	postsynaptic membrane	cellular_component	5	3	210	57	20711	0.0201344
GO:0005946	alpha,alpha-trehalose-phosphate synthase complex (UDP-forming)	cellular_component	6	1	210	2	20711	0.0201768
GO:0030314	junctional membrane complex	cellular_component	4	1	210	2	20711	0.0201768
GO:0048786	presynaptic active zone	cellular_component	4	2	210	24	20711	0.0243923
GO:0015629	actin cytoskeleton	cellular_component	7	5	210	167	20711	0.0278735
GO:0045495	pole plasm	cellular_component	6	1	210	3	20711	0.0301127
GO:0031233	intrinsic component of external side of plasma membrane	cellular_component	6	1	210	3	20711	0.0301127
GO:0005884	actin filament	cellular_component	7	3	210	67	20711	0.0306413
GO:0016529	sarcoplasmic reticulum	cellular_component	7	2	210	28	20711	0.032538
GO:0045169	fusome	cellular_component	6	2	210	28	20711	0.032538
GO:0005905	clathrin-coated pit	cellular_component	4	2	210	31	20711	0.0392458
GO:0045170	spectrosome	cellular_component	6	1	210	4	20711	0.0399483
GO:0071212	subsynaptic reticulum	cellular_component	6	1	210	5	20711	0.0496847
GO:1990316	Atg1/ULK1 kinase complex	cellular_component	6	1	210	5	20711	0.0496847
GO:0005942	phosphatidylinositol 3-kinase complex	cellular_component	7	1	210	5	20711	0.0496847
GO:0061176	type Ib terminal bouton	cellular_component	8	1	210	5	20711	0.0496847
GO:0005875	microtubule associated complex	cellular_component	4	2	210	36	20711	0.0514596
GO:0070469	respiratory chain	cellular_component	4	3	210	86	20711	0.0570357
GO:0060102	collagen and cuticulin-based cuticle extracellular matrix	cellular_component	6	1	210	6	20711	0.0593228
GO:0097482	muscle cell postsynaptic specialization	cellular_component	5	1	210	6	20711	0.0593228
GO:0061689	tricellular tight junction	cellular_component	6	1	210	6	20711	0.0593228
GO:0030964	NADH dehydrogenase complex	cellular_component	5	1	210	6	20711	0.0593228
GO:0005704	polytene chromosome band	cellular_component	7	1	210	6	20711	0.0593228
GO:0031985	Golgi cisterna	cellular_component	7	1	210	7	20711	0.0688636
GO:0036062	presynaptic periactive zone	cellular_component	5	1	210	8	20711	0.078308
GO:0048788	cytoskeleton of presynaptic active zone	cellular_component	8	1	210	8	20711	0.078308
GO:0035324	female germline ring canal	cellular_component	6	1	210	8	20711	0.078308
GO:0045271	respiratory chain complex I	cellular_component	6	1	210	8	20711	0.078308
GO:0016010	dystrophin-associated glycoprotein complex	cellular_component	5	1	210	8	20711	0.078308
GO:0008328	ionotropic glutamate receptor complex	cellular_component	7	1	210	9	20711	0.0876572
GO:0070449	elongin complex	cellular_component	5	1	210	10	20711	0.0969119
GO:0031466	Cul5-RING ubiquitin ligase complex	cellular_component	7	1	210	10	20711	0.0969119
GO:0000794	condensed nuclear chromosome	cellular_component	8	2	210	55	20711	0.107252
GO:0008091	spectrin	cellular_component	6	1	210	12	20711	0.115142
GO:0016593	Cdc73/Paf1 complex	cellular_component	5	1	210	12	20711	0.115142
GO:0005802	trans-Golgi network	cellular_component	7	3	210	119	20711	0.120558
GO:0005892	acetylcholine-gated channel complex	cellular_component	7	1	210	13	20711	0.124119
GO:0045252	oxoglutarate dehydrogenase complex	cellular_component	6	1	210	13	20711	0.124119
GO:0098839	postsynaptic density membrane	cellular_component	5	1	210	13	20711	0.124119
GO:0016528	sarcoplasm	cellular_component	6	1	210	13	20711	0.124119
GO:0043292	contractile fiber	cellular_component	6	1	210	14	20711	0.133006
GO:0005853	eukaryotic translation elongation factor 1 complex	cellular_component	4	1	210	15	20711	0.141803
GO:0005863	striated muscle myosin thick filament	cellular_component	7	1	210	15	20711	0.141803
GO:0005640	nuclear outer membrane	cellular_component	6	1	210	16	20711	0.150511
GO:0000790	nuclear chromatin	cellular_component	7	3	210	135	20711	0.157749
GO:0046658	anchored component of plasma membrane	cellular_component	6	1	210	17	20711	0.159131
GO:0005785	signal recognition particle receptor complex	cellular_component	7	1	210	18	20711	0.167664
GO:0005916	fascia adherens	cellular_component	6	1	210	18	20711	0.167664
GO:0001650	fibrillar center	cellular_component	7	1	210	18	20711	0.167664
GO:0034045	phagophore assembly site membrane	cellular_component	6	1	210	18	20711	0.167664
GO:0030424	axon	cellular_component	6	4	210	222	20711	0.18917
GO:0097060	synaptic membrane	cellular_component	4	1	210	21	20711	0.192749
GO:0071203	WASH complex	cellular_component	4	1	210	21	20711	0.192749
GO:0030315	T-tubule	cellular_component	5	1	210	23	20711	0.209054
GO:0005881	cytoplasmic microtubule	cellular_component	8	1	210	23	20711	0.209054
GO:0005740	mitochondrial envelope	cellular_component	6	1	210	23	20711	0.209054
GO:0005641	nuclear envelope lumen	cellular_component	6	1	210	23	20711	0.209054
GO:0042383	sarcolemma	cellular_component	5	2	210	85	20711	0.213223
GO:0005856	cytoskeleton	cellular_component	6	6	210	395	20711	0.213343
GO:0031093	platelet alpha granule lumen	cellular_component	8	1	210	24	20711	0.217082
GO:0031462	Cul2-RING ubiquitin ligase complex	cellular_component	7	1	210	26	20711	0.232897
GO:0045202	synapse	cellular_component	3	3	210	166	20711	0.23756
GO:0016235	aggresome	cellular_component	6	1	210	28	20711	0.248394
GO:0009925	basal plasma membrane	cellular_component	5	1	210	28	20711	0.248394
GO:0005622	intracellular	cellular_component	4	7	210	511	20711	0.262558
GO:0080008	Cul4-RING E3 ubiquitin ligase complex	cellular_component	7	1	210	31	20711	0.271057
GO:0045179	apical cortex	cellular_component	9	1	210	33	20711	0.285787
GO:0035327	transcriptionally active chromatin	cellular_component	7	1	210	34	20711	0.29304
GO:0030659	cytoplasmic vesicle membrane	cellular_component	6	1	210	36	20711	0.307328
GO:0005882	intermediate filament	cellular_component	7	1	210	37	20711	0.314364
GO:0043005	neuron projection	cellular_component	5	3	210	195	20711	0.317077
GO:0005886	plasma membrane	cellular_component	4	22	210	1935	20711	0.318052
GO:0090575	RNA polymerase II transcription factor complex	cellular_component	6	1	210	40	20711	0.335046
GO:0005903	brush border	cellular_component	5	1	210	42	20711	0.348489
GO:0014704	intercalated disc	cellular_component	6	1	210	42	20711	0.348489
GO:0005887	integral component of plasma membrane	cellular_component	6	9	210	749	20711	0.349675
GO:0030864	cortical actin cytoskeleton	cellular_component	8	1	210	43	20711	0.355108
GO:0005918	septate junction	cellular_component	6	1	210	44	20711	0.361661
GO:0005938	cell cortex	cellular_component	7	3	210	215	20711	0.372402
GO:0043195	terminal bouton	cellular_component	6	1	210	47	20711	0.380923
GO:0005634	nucleus	cellular_component	6	47	210	4418	20711	0.381002
GO:0005747	mitochondrial respiratory chain complex I	cellular_component	7	2	210	134	20711	0.39486
GO:0005759	mitochondrial matrix	cellular_component	7	3	210	224	20711	0.39707
GO:0044297	cell body	cellular_component	4	1	210	51	20711	0.40571
GO:0001725	stress fiber	cellular_component	7	1	210	52	20711	0.411751
GO:0005852	eukaryotic translation initiation factor 3 complex	cellular_component	4	1	210	52	20711	0.411751
GO:0019005	SCF ubiquitin ligase complex	cellular_component	7	1	210	56	20711	0.435308
GO:0042995	cell projection	cellular_component	4	2	210	146	20711	0.436972
GO:0005811	lipid droplet	cellular_component	6	1	210	61	20711	0.463439
GO:0072686	mitotic spindle	cellular_component	7	1	210	64	20711	0.479644
GO:0014069	postsynaptic density	cellular_component	5	1	210	66	20711	0.490175
GO:0005739	mitochondrion	cellular_component	6	17	210	1648	20711	0.507326
GO:0055037	recycling endosome	cellular_component	8	1	210	70	20711	0.510606
GO:0008021	synaptic vesicle	cellular_component	4	1	210	71	20711	0.515585
GO:0005700	polytene chromosome	cellular_component	7	1	210	73	20711	0.525393
GO:0016324	apical plasma membrane	cellular_component	5	2	210	174	20711	0.528595
GO:0005743	mitochondrial inner membrane	cellular_component	6	5	210	480	20711	0.538478
GO:0045177	apical part of cell	cellular_component	4	1	210	82	20711	0.567137
GO:0043186	P granule	cellular_component	8	1	210	86	20711	0.584496
GO:0012505	endomembrane system	cellular_component	4	2	210	209	20711	0.628179
GO:0016323	basolateral plasma membrane	cellular_component	5	1	210	99	20711	0.636271
GO:0015630	microtubule cytoskeleton	cellular_component	7	1	210	111	20711	0.678341
GO:0048471	perinuclear region of cytoplasm	cellular_component	6	4	210	464	20711	0.695456
GO:0016021	integral component of membrane	cellular_component	5	24	210	2594	20711	0.71565
GO:0005768	endosome	cellular_component	7	2	210	249	20711	0.721169
GO:0005813	centrosome	cellular_component	7	2	210	290	20711	0.79543
GO:0009986	cell surface	cellular_component	4	2	210	292	20711	0.798563
GO:0005777	peroxisome	cellular_component	7	1	210	162	20711	0.80938
GO:0005635	nuclear envelope	cellular_component	6	1	210	176	20711	0.83492
GO:0030054	cell junction	cellular_component	3	1	210	178	20711	0.83828
GO:0030425	dendrite	cellular_component	6	1	210	183	20711	0.846383
GO:0005769	early endosome	cellular_component	8	1	210	183	20711	0.846383
GO:0005575	cellular_component	cellular_component	2	5	210	746	20711	0.878392
GO:0005829	cytosol	cellular_component	6	19	210	2359	20711	0.884302
GO:0071013	catalytic step 2 spliceosome	cellular_component	7	1	210	235	20711	0.910064
GO:0005925	focal adhesion	cellular_component	7	2	210	402	20711	0.916977
GO:0043231	intracellular membrane-bounded organelle	cellular_component	5	2	210	412	20711	0.92364
GO:0043025	neuronal cell body	cellular_component	5	1	210	253	20711	0.925301
GO:0005874	microtubule	cellular_component	7	1	210	260	20711	0.930507
GO:0005789	endoplasmic reticulum membrane	cellular_component	5	2	210	473	20711	0.954571
GO:0005783	endoplasmic reticulum	cellular_component	6	4	210	851	20711	0.975175
GO:0070062	extracellular exosome	cellular_component	7	7	210	1366	20711	0.987133
GO:0005737	cytoplasm	cellular_component	5	36	210	4834	20711	0.988751
GO:0005654	nucleoplasm	cellular_component	6	6	210	1309	20711	0.992722
GO:0005794	Golgi apparatus	cellular_component	6	2	210	686	20711	0.993245
GO:0016020	membrane	cellular_component	3	17	210	2919	20711	0.99733
GO:0005730	nucleolus	cellular_component	6	1	210	738	20711	0.999528

## Sheet: molecular function
GO_ID	GO_Term	GO_Function	GO_Level	S gene number	TS gene number	B gene number	TB gene number	pvalue
GO:0008307	structural constituent of muscle	molecular_function	4	8	210	46	20711	1.83265e-08
GO:0051371	muscle alpha-actinin binding	molecular_function	8	6	210	23	20711	8.84454e-08
GO:0031433	telethonin binding	molecular_function	6	4	210	6	20711	1.51661e-07
GO:0042302	structural constituent of cuticle	molecular_function	4	7	210	59	20711	2.17538e-06
GO:0097493	structural molecule activity conferring elasticity	molecular_function	4	5	210	26	20711	5.65143e-06
GO:0004674	protein serine/threonine kinase activity	molecular_function	8	13	210	372	20711	0.000115854
GO:0042805	actinin binding	molecular_function	6	3	210	10	20711	0.00011701
GO:0051373	FATZ binding	molecular_function	6	2	210	3	20711	0.000304921
GO:0005200	structural constituent of cytoskeleton	molecular_function	4	7	210	134	20711	0.000441277
GO:0031432	titin binding	molecular_function	6	2	210	4	20711	0.000605763
GO:0004111	creatine kinase activity	molecular_function	7	2	210	4	20711	0.000605763
GO:0003873	6-phosphofructo-2-kinase activity	molecular_function	8	2	210	6	20711	0.00149423
GO:0005509	calcium ion binding	molecular_function	7	14	210	552	20711	0.00157241
GO:0016772	transferase activity, transferring phosphorus-containing groups	molecular_function	5	2	210	7	20711	0.00207797
GO:0015453	oxidoreduction-driven active transmembrane transporter activity	molecular_function	7	2	210	7	20711	0.00207797
GO:0004867	serine-type endopeptidase inhibitor activity	molecular_function	8	4	210	55	20711	0.00233839
GO:0030506	ankyrin binding	molecular_function	6	3	210	27	20711	0.00251191
GO:0005201	extracellular matrix structural constituent	molecular_function	4	4	210	58	20711	0.00284114
GO:0061629	RNA polymerase II sequence-specific DNA binding transcription factor binding	molecular_function	7	2	210	9	20711	0.00351489
GO:0051015	actin filament binding	molecular_function	7	7	210	192	20711	0.00351616
GO:0008092	cytoskeletal protein binding	molecular_function	5	4	210	62	20711	0.00362013
GO:0004129	cytochrome-c oxidase activity	molecular_function	6	4	210	65	20711	0.00429149
GO:0070412	R-SMAD binding	molecular_function	6	2	210	15	20711	0.0098498
GO:0003785	actin monomer binding	molecular_function	7	2	210	15	20711	0.0098498
GO:0017084	delta1-pyrroline-5-carboxylate synthetase activity	molecular_function	7	1	210	1	20711	0.0101395
GO:0070698	type I activin receptor binding	molecular_function	9	1	210	1	20711	0.0101395
GO:0030617	transforming growth factor beta receptor, inhibitory cytoplasmic mediator activity	molecular_function	5	1	210	1	20711	0.0101395
GO:0004349	glutamate 5-kinase activity	molecular_function	7	1	210	1	20711	0.0101395
GO:0005500	juvenile hormone binding	molecular_function	6	1	210	1	20711	0.0101395
GO:0035175	histone kinase activity (H3-S10 specific)	molecular_function	10	1	210	1	20711	0.0101395
GO:0050543	icosatetraenoic acid binding	molecular_function	7	1	210	1	20711	0.0101395
GO:0008793	aromatic-amino-acid:2-oxoglutarate aminotransferase activity	molecular_function	7	1	210	1	20711	0.0101395
GO:0004350	glutamate-5-semialdehyde dehydrogenase activity	molecular_function	7	1	210	1	20711	0.0101395
GO:0001227	transcriptional repressor activity, RNA polymerase II transcription regulatory region sequence-specific DNA binding	molecular_function	6	2	210	16	20711	0.0111823
GO:0005504	fatty acid binding	molecular_function	5	2	210	18	20711	0.0140694
GO:0000981	RNA polymerase II transcription factor activity, sequence-specific DNA binding	molecular_function	5	4	210	93	20711	0.014876
GO:0005388	calcium-transporting ATPase activity	molecular_function	10	2	210	20	20711	0.0172418
GO:0048495	Roundabout binding	molecular_function	6	1	210	2	20711	0.0201768
GO:0042329	structural constituent of collagen and cuticulin-based cuticle	molecular_function	5	1	210	2	20711	0.0201768
GO:0008036	diuretic hormone receptor activity	molecular_function	5	1	210	2	20711	0.0201768
GO:0070080	titin Z domain binding	molecular_function	6	1	210	2	20711	0.0201768
GO:0005497	androgen binding	molecular_function	5	1	210	2	20711	0.0201768
GO:0004353	glutamate dehydrogenase [NAD(P)+] activity	molecular_function	7	1	210	2	20711	0.0201768
GO:0032422	purine-rich negative regulatory element binding	molecular_function	8	1	210	2	20711	0.0201768
GO:0047536	2-aminoadipate transaminase activity	molecular_function	7	1	210	2	20711	0.0201768
GO:0031014	troponin T binding	molecular_function	6	1	210	2	20711	0.0201768
GO:1901612	cardiolipin binding	molecular_function	7	1	210	2	20711	0.0201768
GO:0046935	1-phosphatidylinositol-3-kinase regulator activity	molecular_function	7	1	210	2	20711	0.0201768
GO:0004035	alkaline phosphatase activity	molecular_function	8	1	210	2	20711	0.0201768
GO:0031013	troponin I binding	molecular_function	6	1	210	2	20711	0.0201768
GO:0004805	trehalose-phosphatase activity	molecular_function	9	1	210	2	20711	0.0201768
GO:0003825	alpha,alpha-trehalose-phosphate synthase (UDP-forming) activity	molecular_function	8	1	210	2	20711	0.0201768
GO:0015002	heme-copper terminal oxidase activity	molecular_function	5	1	210	2	20711	0.0201768
GO:0004352	glutamate dehydrogenase (NAD+) activity	molecular_function	8	1	210	2	20711	0.0201768
GO:0008068	extracellularly glutamate-gated chloride channel activity	molecular_function	11	1	210	2	20711	0.0201768
GO:0008157	protein phosphatase 1 binding	molecular_function	8	2	210	22	20711	0.0206868
GO:0005319	lipid transporter activity	molecular_function	4	2	210	23	20711	0.0225077
GO:0005516	calmodulin binding	molecular_function	5	4	210	109	20711	0.0250438
GO:0015293	symporter activity	molecular_function	7	2	210	25	20711	0.0263391
GO:0005355	glucose transmembrane transporter activity	molecular_function	9	2	210	26	20711	0.0283465
GO:0004613	phosphoenolpyruvate carboxykinase (GTP) activity	molecular_function	8	1	210	3	20711	0.0301127
GO:0070325	lipoprotein particle receptor binding	molecular_function	6	1	210	3	20711	0.0301127
GO:0008331	high voltage-gated calcium channel activity	molecular_function	10	1	210	3	20711	0.0301127
GO:0070410	co-SMAD binding	molecular_function	6	1	210	3	20711	0.0301127
GO:0018479	benzaldehyde dehydrogenase (NAD+) activity	molecular_function	8	1	210	3	20711	0.0301127
GO:0030020	extracellular matrix structural constituent conferring tensile strength	molecular_function	5	1	210	3	20711	0.0301127
GO:0005324	long-chain fatty acid transporter activity	molecular_function	5	1	210	3	20711	0.0301127
GO:0004672	protein kinase activity	molecular_function	7	7	210	298	20711	0.0327353
GO:0019900	kinase binding	molecular_function	6	3	210	70	20711	0.0342565
GO:0031005	filamin binding	molecular_function	6	1	210	4	20711	0.0399483
GO:0036041	long-chain fatty acid binding	molecular_function	6	1	210	4	20711	0.0399483
GO:0070411	I-SMAD binding	molecular_function	6	1	210	4	20711	0.0399483
GO:0004948	calcitonin receptor activity	molecular_function	8	1	210	4	20711	0.0399483
GO:0030899	calcium-dependent ATPase activity	molecular_function	11	1	210	4	20711	0.0399483
GO:0004331	fructose-2,6-bisphosphate 2-phosphatase activity	molecular_function	10	1	210	4	20711	0.0399483
GO:0070538	oleic acid binding	molecular_function	7	1	210	4	20711	0.0399483
GO:0004359	glutaminase activity	molecular_function	7	1	210	4	20711	0.0399483
GO:0001758	retinal dehydrogenase activity	molecular_function	7	1	210	4	20711	0.0399483
GO:0000978	RNA polymerase II proximal promoter sequence-specific DNA binding	molecular_function	10	4	210	128	20711	0.0414977
GO:0000977	RNA polymerase II regulatory region sequence-specific DNA binding	molecular_function	9	4	210	130	20711	0.0435138
GO:0005351	carbohydrate:proton symporter activity	molecular_function	7	2	210	33	20711	0.0439826
GO:0003779	actin binding	molecular_function	6	7	210	326	20711	0.0490103
GO:0043426	MRF binding	molecular_function	8	1	210	5	20711	0.0496847
GO:0015278	calcium-release channel activity	molecular_function	9	1	210	5	20711	0.0496847
GO:0020037	heme binding	molecular_function	6	4	210	139	20711	0.0532569
GO:0030306	ADP-ribosylation factor binding	molecular_function	8	1	210	6	20711	0.0593228
GO:0019841	retinol binding	molecular_function	7	1	210	6	20711	0.0593228
GO:0004108	citrate (Si)-synthase activity	molecular_function	8	1	210	6	20711	0.0593228
GO:0015114	phosphate ion transmembrane transporter activity	molecular_function	8	1	210	6	20711	0.0593228
GO:0032454	histone demethylase activity (H3-K9 specific)	molecular_function	6	1	210	6	20711	0.0593228
GO:0034713	type I transforming growth factor beta receptor binding	molecular_function	8	1	210	6	20711	0.0593228
GO:0008273	calcium, potassium:sodium antiporter activity	molecular_function	11	1	210	6	20711	0.0593228
GO:0045499	chemorepellent activity	molecular_function	7	1	210	7	20711	0.0688636
GO:0043621	protein self-association	molecular_function	5	2	210	43	20711	0.0704721
GO:0005198	structural molecule activity	molecular_function	3	4	210	156	20711	0.0746093
GO:0008137	NADH dehydrogenase (ubiquinone) activity	molecular_function	8	3	210	97	20711	0.075923
GO:0005344	oxygen carrier activity	molecular_function	4	1	210	8	20711	0.078308
GO:0042030	ATPase inhibitor activity	molecular_function	6	1	210	8	20711	0.078308
GO:0003994	aconitate hydratase activity	molecular_function	7	1	210	8	20711	0.078308
GO:0042802	identical protein binding	molecular_function	5	9	210	516	20711	0.0806517
GO:0005089	Rho guanyl-nucleotide exchange factor activity	molecular_function	9	2	210	47	20711	0.082205
GO:0016301	kinase activity	molecular_function	6	6	210	301	20711	0.0867239
GO:0004089	carbonate dehydratase activity	molecular_function	7	1	210	9	20711	0.0876572
GO:0004591	oxoglutarate dehydrogenase (succinyl-transferring) activity	molecular_function	7	1	210	9	20711	0.0876572
GO:0030215	semaphorin receptor binding	molecular_function	6	1	210	9	20711	0.0876572
GO:0030169	low-density lipoprotein particle binding	molecular_function	7	1	210	9	20711	0.0876572
GO:0003714	transcription corepressor activity	molecular_function	5	3	210	105	20711	0.0911647
GO:0008010	structural constituent of chitin-based larval cuticle	molecular_function	6	1	210	10	20711	0.0969119
GO:0051864	histone demethylase activity (H3-K36 specific)	molecular_function	7	1	210	10	20711	0.0969119
GO:0070492	oligosaccharide binding	molecular_function	5	1	210	10	20711	0.0969119
GO:0031402	sodium ion binding	molecular_function	8	1	210	10	20711	0.0969119
GO:0002020	protease binding	molecular_function	6	3	210	108	20711	0.0971842
GO:0000976	transcription regulatory region sequence-specific DNA binding	molecular_function	8	2	210	53	20711	0.100812
GO:0008061	chitin binding	molecular_function	5	2	210	53	20711	0.100812
GO:0030374	ligand-dependent nuclear receptor transcription coactivator activity	molecular_function	6	2	210	54	20711	0.104018
GO:0042054	histone methyltransferase activity	molecular_function	8	1	210	11	20711	0.106073
GO:0004396	hexokinase activity	molecular_function	7	1	210	11	20711	0.106073
GO:0032036	myosin heavy chain binding	molecular_function	7	1	210	11	20711	0.106073
GO:0036122	BMP binding	molecular_function	6	1	210	11	20711	0.106073
GO:0030898	actin-dependent ATPase activity	molecular_function	11	1	210	11	20711	0.106073
GO:0015464	acetylcholine receptor activity	molecular_function	6	1	210	11	20711	0.106073
GO:0003700	DNA binding transcription factor activity	molecular_function	4	7	210	395	20711	0.108127
GO:0004385	guanylate kinase activity	molecular_function	8	1	210	12	20711	0.115142
GO:0019829	cation-transporting ATPase activity	molecular_function	8	1	210	12	20711	0.115142
GO:0043395	heparan sulfate proteoglycan binding	molecular_function	6	1	210	12	20711	0.115142
GO:0008253	5'-nucleotidase activity	molecular_function	9	1	210	12	20711	0.115142
GO:0005523	tropomyosin binding	molecular_function	6	1	210	12	20711	0.115142
GO:0044325	ion channel binding	molecular_function	5	2	210	58	20711	0.117111
GO:0043565	sequence-specific DNA binding	molecular_function	7	5	210	259	20711	0.124041
GO:0008301	DNA binding, bending	molecular_function	7	1	210	13	20711	0.124119
GO:0004340	glucokinase activity	molecular_function	8	1	210	13	20711	0.124119
GO:0000900	translation repressor activity, mRNA regulatory element binding	molecular_function	5	1	210	13	20711	0.124119
GO:0042166	acetylcholine binding	molecular_function	5	1	210	13	20711	0.124119
GO:0019158	mannokinase activity	molecular_function	8	1	210	13	20711	0.124119
GO:0001158	enhancer sequence-specific DNA binding	molecular_function	9	1	210	13	20711	0.124119
GO:0004523	RNA-DNA hybrid ribonuclease activity	molecular_function	10	1	210	13	20711	0.124119
GO:0004222	metalloendopeptidase activity	molecular_function	8	3	210	121	20711	0.125013
GO:0003713	transcription coactivator activity	molecular_function	5	3	210	124	20711	0.131805
GO:0008865	fructokinase activity	molecular_function	8	1	210	14	20711	0.133006
GO:0019825	oxygen binding	molecular_function	5	1	210	15	20711	0.141803
GO:0005391	sodium:potassium-exchanging ATPase activity	molecular_function	11	1	210	15	20711	0.141803
GO:0000146	microfilament motor activity	molecular_function	10	1	210	16	20711	0.150511
GO:0048407	platelet-derived growth factor binding	molecular_function	6	1	210	16	20711	0.150511
GO:0005536	glucose binding	molecular_function	6	1	210	16	20711	0.150511
GO:0070064	proline-rich region binding	molecular_function	5	1	210	16	20711	0.150511
GO:0003774	motor activity	molecular_function	9	2	210	68	20711	0.151423
GO:0004697	protein kinase C activity	molecular_function	9	1	210	17	20711	0.159131
GO:0004713	protein tyrosine kinase activity	molecular_function	8	2	210	71	20711	0.162072
GO:0001540	amyloid-beta binding	molecular_function	6	1	210	18	20711	0.167664
GO:0098531	transcription factor activity, direct ligand regulated sequence-specific DNA binding	molecular_function	5	1	210	18	20711	0.167664
GO:0035255	ionotropic glutamate receptor binding	molecular_function	7	1	210	19	20711	0.176111
GO:0070530	K63-linked polyubiquitin modification-dependent protein binding	molecular_function	7	1	210	19	20711	0.176111
GO:0008134	transcription factor binding	molecular_function	5	4	210	218	20711	0.181061
GO:0005047	signal recognition particle binding	molecular_function	6	1	210	20	20711	0.184472
GO:0005044	scavenger receptor activity	molecular_function	4	1	210	20	20711	0.184472
GO:0048039	ubiquinone binding	molecular_function	6	1	210	20	20711	0.184472
GO:0008237	metallopeptidase activity	molecular_function	7	2	210	78	20711	0.187398
GO:0019901	protein kinase binding	molecular_function	7	5	210	299	20711	0.188036
GO:0003746	translation elongation factor activity	molecular_function	8	2	210	79	20711	0.191062
GO:0008135	translation factor activity, RNA binding	molecular_function	7	1	210	21	20711	0.192749
GO:0030955	potassium ion binding	molecular_function	8	1	210	22	20711	0.200943
GO:0005154	epidermal growth factor receptor binding	molecular_function	7	1	210	22	20711	0.200943
GO:0008553	proton-exporting ATPase activity, phosphorylative mechanism	molecular_function	10	1	210	23	20711	0.209054
GO:0004857	enzyme inhibitor activity	molecular_function	5	1	210	23	20711	0.209054
GO:0003755	peptidyl-prolyl cis-trans isomerase activity	molecular_function	6	2	210	86	20711	0.216942
GO:0005086	ARF guanyl-nucleotide exchange factor activity	molecular_function	8	1	210	24	20711	0.217082
GO:0003707	steroid hormone receptor activity	molecular_function	5	1	210	24	20711	0.217082
GO:0004029	aldehyde dehydrogenase (NAD) activity	molecular_function	7	1	210	25	20711	0.22503
GO:0008188	neuropeptide receptor activity	molecular_function	7	1	210	25	20711	0.22503
GO:0019894	kinesin binding	molecular_function	6	1	210	26	20711	0.232897
GO:0005528	FK506 binding	molecular_function	6	1	210	26	20711	0.232897
GO:0005546	phosphatidylinositol-4,5-bisphosphate binding	molecular_function	9	1	210	27	20711	0.240685
GO:0000979	RNA polymerase II core promoter sequence-specific DNA binding	molecular_function	10	1	210	28	20711	0.248394
GO:0097110	scaffold protein binding	molecular_function	5	1	210	28	20711	0.248394
GO:0015631	tubulin binding	molecular_function	6	1	210	29	20711	0.256026
GO:0004521	endoribonuclease activity	molecular_function	8	1	210	29	20711	0.256026
GO:0004879	nuclear receptor activity	molecular_function	6	1	210	29	20711	0.256026
GO:0000993	RNA polymerase II core binding	molecular_function	7	1	210	30	20711	0.26358
GO:0001047	core promoter binding	molecular_function	8	1	210	30	20711	0.26358
GO:0022857	transmembrane transporter activity	molecular_function	4	2	210	99	20711	0.265642
GO:0004842	ubiquitin-protein transferase activity	molecular_function	6	4	210	259	20711	0.268743
GO:0050840	extracellular matrix binding	molecular_function	4	1	210	31	20711	0.271057
GO:0008757	S-adenosylmethionine-dependent methyltransferase activity	molecular_function	7	1	210	31	20711	0.271057
GO:0017112	Rab guanyl-nucleotide exchange factor activity	molecular_function	9	1	210	31	20711	0.271057
GO:0044212	transcription regulatory region DNA binding	molecular_function	7	2	210	102	20711	0.276915
GO:0017022	myosin binding	molecular_function	6	1	210	32	20711	0.27846
GO:0070006	metalloaminopeptidase activity	molecular_function	9	1	210	33	20711	0.285787
GO:0004601	peroxidase activity	molecular_function	4	1	210	34	20711	0.29304
GO:0031386	protein tag	molecular_function	3	1	210	34	20711	0.29304
GO:0016798	hydrolase activity, acting on glycosyl bonds	molecular_function	5	1	210	35	20711	0.30022
GO:0004866	endopeptidase inhibitor activity	molecular_function	7	1	210	36	20711	0.307328
GO:0003712	transcription cofactor activity	molecular_function	4	1	210	36	20711	0.307328
GO:0001085	RNA polymerase II transcription factor binding	molecular_function	6	1	210	39	20711	0.328222
GO:0070628	proteasome binding	molecular_function	5	1	210	41	20711	0.341802
GO:0030145	manganese ion binding	molecular_function	8	1	210	41	20711	0.341802
GO:0008017	microtubule binding	molecular_function	7	3	210	205	20711	0.344786
GO:0046983	protein dimerization activity	molecular_function	5	2	210	121	20711	0.347711
GO:0005262	calcium channel activity	molecular_function	8	1	210	43	20711	0.355108
GO:0002039	p53 binding	molecular_function	5	1	210	44	20711	0.361661
GO:0000980	RNA polymerase II distal enhancer sequence-specific DNA binding	molecular_function	10	1	210	45	20711	0.368147
GO:0042803	protein homodimerization activity	molecular_function	6	6	210	487	20711	0.372936
GO:0016791	phosphatase activity	molecular_function	7	1	210	46	20711	0.374568
GO:0009055	electron transfer activity	molecular_function	5	2	210	130	20711	0.380505
GO:0003954	NADH dehydrogenase activity	molecular_function	6	1	210	51	20711	0.40571
GO:0019905	syntaxin binding	molecular_function	6	1	210	51	20711	0.40571
GO:0048306	calcium-dependent protein binding	molecular_function	5	1	210	51	20711	0.40571
GO:0008022	protein C-terminus binding	molecular_function	5	2	210	140	20711	0.416105
GO:0030674	protein binding, bridging	molecular_function	5	1	210	54	20711	0.423649
GO:0051117	ATPase binding	molecular_function	6	1	210	55	20711	0.429508
GO:0003824	catalytic activity	molecular_function	3	5	210	429	20711	0.44021
GO:0042626	ATPase activity, coupled to transmembrane movement of substances	molecular_function	8	1	210	59	20711	0.452358
GO:0036459	thiol-dependent ubiquitinyl hydrolase activity	molecular_function	9	1	210	61	20711	0.463439
GO:0042277	peptide binding	molecular_function	5	1	210	62	20711	0.468896
GO:0051539	4 iron, 4 sulfur cluster binding	molecular_function	6	1	210	64	20711	0.479644
GO:0003730	mRNA 3'-UTR binding	molecular_function	8	1	210	73	20711	0.525393
GO:0004930	G-protein coupled receptor activity	molecular_function	6	1	210	75	20711	0.535002
GO:0046982	protein heterodimerization activity	molecular_function	6	3	210	278	20711	0.537306
GO:0005524	ATP binding	molecular_function	5	18	210	1778	20711	0.538793
GO:0042826	histone deacetylase binding	molecular_function	6	1	210	78	20711	0.549055
GO:0005518	collagen binding	molecular_function	5	1	210	80	20711	0.558188
GO:0043022	ribosome binding	molecular_function	6	1	210	81	20711	0.562685
GO:0004725	protein tyrosine phosphatase activity	molecular_function	9	1	210	83	20711	0.571543
GO:0005507	copper ion binding	molecular_function	8	1	210	84	20711	0.575905
GO:0003690	double-stranded DNA binding	molecular_function	7	1	210	86	20711	0.584496
GO:0016853	isomerase activity	molecular_function	4	1	210	87	20711	0.588727
GO:0005096	GTPase activator activity	molecular_function	6	2	210	196	20711	0.593202
GO:0004843	thiol-dependent ubiquitin-specific protease activity	molecular_function	10	1	210	89	20711	0.59706
GO:0000166	nucleotide binding	molecular_function	5	9	210	928	20711	0.60189
GO:0005102	receptor binding	molecular_function	5	2	210	206	20711	0.620318
GO:0005178	integrin binding	molecular_function	6	1	210	97	20711	0.628745
GO:0017137	Rab GTPase binding	molecular_function	9	1	210	97	20711	0.628745
GO:0008201	heparin binding	molecular_function	6	1	210	99	20711	0.636271
GO:0004175	endopeptidase activity	molecular_function	7	1	210	102	20711	0.647276
GO:0003697	single-stranded DNA binding	molecular_function	7	1	210	112	20711	0.68162
GO:0046872	metal ion binding	molecular_function	6	12	210	1358	20711	0.729619
GO:0030170	pyridoxal phosphate binding	molecular_function	6	1	210	129	20711	0.732538
GO:0019899	enzyme binding	molecular_function	5	2	210	256	20711	0.735274
GO:0008289	lipid binding	molecular_function	4	1	210	134	20711	0.745908
GO:0003674	molecular_function	molecular_function	2	8	210	954	20711	0.756461
GO:0003729	mRNA binding	molecular_function	7	2	210	275	20711	0.770536
GO:0004252	serine-type endopeptidase activity	molecular_function	8	1	210	147	20711	0.777639
GO:0003743	translation initiation factor activity	molecular_function	8	1	210	148	20711	0.77991
GO:0016740	transferase activity	molecular_function	4	5	210	645	20711	0.786597
GO:0003677	DNA binding	molecular_function	6	7	210	877	20711	0.790512
GO:0008270	zinc ion binding	molecular_function	8	6	210	778	20711	0.804997
GO:0003682	chromatin binding	molecular_function	4	2	210	309	20711	0.823528
GO:0031625	ubiquitin protein ligase binding	molecular_function	7	2	210	319	20711	0.836888
GO:0019904	protein domain specific binding	molecular_function	5	1	210	182	20711	0.844795
GO:0051082	unfolded protein binding	molecular_function	5	1	210	193	20711	0.861397
GO:0003924	GTPase activity	molecular_function	9	2	210	350	20711	0.872702
GO:0016491	oxidoreductase activity	molecular_function	4	3	210	489	20711	0.876104
GO:0008233	peptidase activity	molecular_function	5	1	210	216	20711	0.890615
GO:0005515	protein binding	molecular_function	4	28	210	3418	20711	0.912444
GO:0005525	GTP binding	molecular_function	8	2	210	417	20711	0.926781
GO:0003676	nucleic acid binding	molecular_function	5	3	210	623	20711	0.953869
GO:0016887	ATPase activity	molecular_function	9	1	210	308	20711	0.957682
GO:0003723	RNA binding	molecular_function	6	4	210	936	20711	0.986915
GO:0016787	hydrolase activity	molecular_function	4	2	210	687	20711	0.993307
