# Supplementary material for: Transcriptome Analysis Provides Insights into Water Immersion Promoting the Decocooning of Osmia excavata Alfken
Source: Insects. 2024 Apr 18;15(4):288. doi: 10.3390/insects15040288 (PMC11049900; doi:10.3390/insects15040288)
Supplement: Supplementary file 1 [file insects-15-00288-s001.zip › Supplementary Files-proofreading/Table S4 KEGG enrichment analysis.xlsx]

## Sheet: sheet1
Pathway_ID	KEGG_Level_1	KEGG_Level_2	Pathway_Name	IDs	S	TS	B	TB	Rich.Factor	P.value	Sig.Sign.P	Q.value	Sig.Sign.Q
ko04260	Organismal Systems	Circulatory system	Cardiac muscle contraction	TRINITY_DN1904_c0_g5, TRINITY_DN1050_c0_g2, TRINITY_DN27244_c0_g1, TRINITY_DN12543_c0_g2, TRINITY_DN28009_c0_g1, TRINITY_DN25205_c0_g1, TRINITY_DN3858_c0_g1	7	99	82	10059	0.0854	1.50241e-05	****	0.000500804	***
ko04261	Organismal Systems	Circulatory system	Adrenergic signaling in cardiomyocytes	TRINITY_DN27244_c0_g1, TRINITY_DN12543_c0_g2, TRINITY_DN28009_c0_g1, TRINITY_DN25205_c0_g1, TRINITY_DN3053_c0_g1, TRINITY_DN3858_c0_g1	6	99	77	10059	0.0779	0.000105261	***	0.00263153	**
ko04391	Environmental Information Processing	Signal transduction	Hippo signaling pathway - fly	TRINITY_DN4615_c0_g1, TRINITY_DN1916_c0_g1, TRINITY_DN4483_c0_g1, TRINITY_DN1424_c0_g3, TRINITY_DN3533_c0_g2	5	99	65	10059	0.0769	0.000431852	***	0.00719754	**
ko04711	Organismal Systems	Environmental adaptation	Circadian rhythm - fly	TRINITY_DN1908_c1_g3, TRINITY_DN1404_c1_g1	2	99	10	10059	0.2	0.00409877	**	0.0585538	ns
ko04745	Organismal Systems	Sensory system	Phototransduction - fly	TRINITY_DN3408_c0_g1, TRINITY_DN4483_c0_g1, TRINITY_DN3533_c0_g2	3	99	36	10059	0.0833	0.00521787	**	0.0652234	ns
ko00524	Metabolism	Biosynthesis of other secondary metabolites	Neomycin, kanamycin and gentamicin biosynthesis	TRINITY_DN1959_c1_g1, TRINITY_DN281_c0_g1	2	99	14	10059	0.1429	0.00807895	**	0.0897661	ns
ko04068	Environmental Information Processing	Signal transduction	FoxO signaling pathway	TRINITY_DN895_c0_g1, TRINITY_DN428_c1_g4, TRINITY_DN763_c4_g1, TRINITY_DN428_c1_g3, TRINITY_DN2037_c0_g1, TRINITY_DN17634_c0_g5	6	99	188	10059	0.0319	0.010499	*	0.10499	ns
ko00500	Metabolism	Carbohydrate metabolism	Starch and sucrose metabolism	TRINITY_DN1959_c1_g1, TRINITY_DN6123_c0_g1, TRINITY_DN16281_c0_g1, TRINITY_DN281_c0_g1	4	99	94	10059	0.0426	0.0137082	*	0.12462	ns
ko00051	Metabolism	Carbohydrate metabolism	Fructose and mannose metabolism	TRINITY_DN1959_c1_g1, TRINITY_DN8655_c0_g1, TRINITY_DN281_c0_g1, TRINITY_DN27089_c0_g1	4	99	106	10059	0.0377	0.020435	*	0.170292	ns
ko04512	Environmental Information Processing	Signaling molecules and interaction	ECM-receptor interaction	TRINITY_DN580_c1_g2, TRINITY_DN8962_c0_g1, TRINITY_DN1916_c1_g1, TRINITY_DN3702_c0_g1, TRINITY_DN27560_c0_g1	5	99	165	10059	0.0303	0.0232572	*	0.178902	ns
ko04013	Environmental Information Processing	Signal transduction	MAPK signaling pathway - fly	TRINITY_DN3966_c0_g1, TRINITY_DN1222_c0_g3, TRINITY_DN948_c0_g1, TRINITY_DN484_c0_g1	4	99	113	10059	0.0354	0.0251542	*	0.179673	ns
ko00310	Metabolism	Amino acid metabolism	Lysine degradation	TRINITY_DN1070_c0_g3, TRINITY_DN1502_c0_g1, TRINITY_DN3954_c0_g2, TRINITY_DN896_c0_g1	4	99	123	10059	0.0325	0.0329536	*	0.21969	ns
ko00910	Metabolism	Energy metabolism	Nitrogen metabolism	TRINITY_DN22554_c0_g2, TRINITY_DN9572_c0_g1	2	99	31	10059	0.0645	0.0370557	*	0.228212	ns
ko00300	Metabolism	Amino acid metabolism	Lysine biosynthesis	TRINITY_DN1502_c0_g1	1	99	4	10059	0.25	0.0387961	*	0.228212	ns
ko04371	Environmental Information Processing	Signal transduction	Apelin signaling pathway	TRINITY_DN27244_c0_g1, TRINITY_DN25205_c0_g1, TRINITY_DN2279_c2_g1	3	99	80	10059	0.0375	0.0440923	*	0.244957	ns
ko04919	Organismal Systems	Endocrine system	Thyroid hormone signaling pathway	TRINITY_DN3301_c0_g2, TRINITY_DN12543_c0_g2, TRINITY_DN3053_c0_g1	3	99	82	10059	0.0366	0.0468717	*	0.246693	ns
ko00020	Metabolism	Carbohydrate metabolism	Citrate cycle (TCA cycle)	TRINITY_DN2037_c0_g1, TRINITY_DN896_c0_g1, TRINITY_DN3631_c0_g1, TRINITY_DN3096_c0_g1	4	99	144	10059	0.0278	0.0534774	ns	0.255271	ns
ko00220	Metabolism	Amino acid metabolism	Arginine biosynthesis	TRINITY_DN147_c1_g1, TRINITY_DN22554_c0_g2	2	99	38	10059	0.0526	0.053607	ns	0.255271	ns
ko04020	Environmental Information Processing	Signal transduction	Calcium signaling pathway	TRINITY_DN232_c0_g1, TRINITY_DN28009_c0_g1, TRINITY_DN3053_c0_g1	3	99	91	10059	0.033	0.0604144	ns	0.274611	ns
ko00190	Metabolism	Energy metabolism	Oxidative phosphorylation	TRINITY_DN25977_c0_g1, TRINITY_DN25790_c0_g1, TRINITY_DN1904_c0_g5, TRINITY_DN1050_c0_g2, TRINITY_DN12388_c0_g2, TRINITY_DN26358_c0_g1, TRINITY_DN14046_c0_g1, TRINITY_DN6489_c0_g1	8	99	443	10059	0.0181	0.0700112	ns	0.304397	ns
ko04140	Cellular Processes	Transport and catabolism	Autophagy - animal	TRINITY_DN895_c0_g1, TRINITY_DN2023_c0_g1, TRINITY_DN428_c1_g4, TRINITY_DN428_c1_g3, TRINITY_DN908_c0_g1	5	99	237	10059	0.0211	0.0842191	ns	0.350913	ns
ko00330	Metabolism	Amino acid metabolism	Arginine and proline metabolism	TRINITY_DN246_c0_g1, TRINITY_DN27684_c0_g1, TRINITY_DN25421_c0_g1	3	99	108	10059	0.0278	0.0903262	ns	0.352829	ns
ko04320	Organismal Systems	Development and regeneration	Dorso-ventral axis formation	TRINITY_DN3966_c0_g1, TRINITY_DN1517_c0_g1	2	99	53	10059	0.0377	0.0956915	ns	0.352829	ns
ko04115	Cellular Processes	Cell growth and death	p53 signaling pathway	TRINITY_DN551_c0_g1, TRINITY_DN2279_c2_g1	2	99	53	10059	0.0377	0.0956915	ns	0.352829	ns
ko04714	Organismal Systems	Environmental adaptation	Thermogenesis	TRINITY_DN25977_c0_g1, TRINITY_DN25790_c0_g1, TRINITY_DN1904_c0_g5, TRINITY_DN1050_c0_g2, TRINITY_DN3301_c0_g2	5	99	249	10059	0.0201	0.0987921	ns	0.352829	ns
ko04624	Organismal Systems	Immune system	Toll and Imd signaling pathway	TRINITY_DN10799_c0_g1, TRINITY_DN484_c0_g1	2	99	58	10059	0.0345	0.111291	ns	0.383763	ns
ko04150	Environmental Information Processing	Signal transduction	mTOR signaling pathway	TRINITY_DN3408_c0_g1, TRINITY_DN895_c0_g1, TRINITY_DN428_c1_g4, TRINITY_DN428_c1_g3, TRINITY_DN1404_c1_g1	5	99	267	10059	0.0187	0.122875	ns	0.409582	ns
ko04213	Organismal Systems	Aging	Longevity regulating pathway - multiple species	TRINITY_DN895_c0_g1, TRINITY_DN763_c4_g1, TRINITY_DN17634_c0_g5	3	99	136	10059	0.0221	0.149989	ns	0.48005	ns
ko00250	Metabolism	Amino acid metabolism	Alanine, aspartate and glutamate metabolism	TRINITY_DN147_c1_g1, TRINITY_DN22554_c0_g2	2	99	76	10059	0.0263	0.171844	ns	0.48005	ns
ko04520	Cellular Processes	Cellular community - eukaryotes	Adherens junction	TRINITY_DN3301_c0_g2, TRINITY_DN2028_c0_g1	2	99	77	10059	0.026	0.175358	ns	0.48005	ns
ko04214	Cellular Processes	Cell growth and death	Apoptosis - fly	TRINITY_DN1222_c0_g3, TRINITY_DN484_c0_g1	2	99	78	10059	0.0256	0.178883	ns	0.48005	ns
ko00730	Metabolism	Metabolism of cofactors and vitamins	Thiamine metabolism	TRINITY_DN2033_c0_g1	1	99	20	10059	0.05	0.179632	ns	0.48005	ns
ko00380	Metabolism	Amino acid metabolism	Tryptophan metabolism	TRINITY_DN1502_c0_g1, TRINITY_DN896_c0_g1	2	99	79	10059	0.0253	0.182419	ns	0.48005	ns
ko04390	Environmental Information Processing	Signal transduction	Hippo signaling pathway	TRINITY_DN3301_c0_g2, TRINITY_DN2279_c2_g1	2	99	85	10059	0.0235	0.203839	ns	0.522665	ns
ko04341	Environmental Information Processing	Signal transduction	Hedgehog signaling pathway - fly	TRINITY_DN1404_c1_g1	1	99	25	10059	0.04	0.2193	ns	0.548249	ns
ko00052	Metabolism	Carbohydrate metabolism	Galactose metabolism	TRINITY_DN1959_c1_g1, TRINITY_DN281_c0_g1	2	99	93	10059	0.0215	0.232798	ns	0.562952	ns
ko00531	Metabolism	Glycan biosynthesis and metabolism	Glycosaminoglycan degradation	TRINITY_DN6183_c0_g1	1	99	32	10059	0.0312	0.271664	ns	0.631777	ns
ko04392	Environmental Information Processing	Signal transduction	Hippo signaling pathway - multiple species	TRINITY_DN1424_c0_g3	1	99	34	10059	0.0294	0.285976	ns	0.64294	ns
ko04310	Environmental Information Processing	Signal transduction	Wnt signaling pathway	TRINITY_DN3408_c0_g1, TRINITY_DN484_c0_g1, TRINITY_DN1404_c1_g1	3	99	192	10059	0.0156	0.293012	ns	0.64294	ns
ko04723	Organismal Systems	Nervous system	Retrograde endocannabinoid signaling	TRINITY_DN25977_c0_g1, TRINITY_DN25790_c0_g1	2	99	111	10059	0.018	0.298538	ns	0.64294	ns
ko04350	Environmental Information Processing	Signal transduction	TGF-beta signaling pathway	TRINITY_DN1090_c0_g1, TRINITY_DN948_c0_g5	2	99	112	10059	0.0179	0.302182	ns	0.64294	ns
ko04620	Organismal Systems	Immune system	Toll-like receptor signaling pathway	TRINITY_DN17969_c0_g1	1	99	42	10059	0.0238	0.340492	ns	0.685242	ns
ko00760	Metabolism	Metabolism of cofactors and vitamins	Nicotinate and nicotinamide metabolism	TRINITY_DN9909_c0_g1	1	99	42	10059	0.0238	0.340492	ns	0.685242	ns
ko00630	Metabolism	Carbohydrate metabolism	Glyoxylate and dicarboxylate metabolism	TRINITY_DN3631_c0_g1, TRINITY_DN3096_c0_g1	2	99	126	10059	0.0159	0.352755	ns	0.685242	ns
ko00010	Metabolism	Carbohydrate metabolism	Glycolysis / Gluconeogenesis	TRINITY_DN1959_c1_g1, TRINITY_DN2037_c0_g1, TRINITY_DN281_c0_g1	3	99	215	10059	0.014	0.355147	ns	0.685242	ns
ko04670	Organismal Systems	Immune system	Leukocyte transendothelial migration	TRINITY_DN3301_c0_g2, TRINITY_DN27244_c0_g1	2	99	127	10059	0.0157	0.356326	ns	0.685242	ns
ko02010	Environmental Information Processing	Membrane transport	ABC transporters	TRINITY_DN240_c0_g1	1	99	48	10059	0.0208	0.378656	ns	0.705774	ns
ko04137	Cellular Processes	Transport and catabolism	Mitophagy - animal	TRINITY_DN763_c4_g1, TRINITY_DN484_c0_g1	2	99	134	10059	0.0149	0.381118	ns	0.705774	ns
ko04530	Cellular Processes	Cellular community - eukaryotes	Tight junction	TRINITY_DN3301_c0_g2, TRINITY_DN27244_c0_g1	2	99	139	10059	0.0144	0.398585	ns	0.719421	ns
ko00790	Metabolism	Metabolism of cofactors and vitamins	Folate biosynthesis	TRINITY_DN2033_c0_g1	1	99	52	10059	0.0192	0.402876	ns	0.719421	ns
ko00830	Metabolism	Metabolism of cofactors and vitamins	Retinol metabolism	TRINITY_DN7873_c0_g1	1	99	65	10059	0.0154	0.475316	ns	0.785608	ns
ko00520	Metabolism	Carbohydrate metabolism	Amino sugar and nucleotide sugar metabolism	TRINITY_DN1959_c1_g1, TRINITY_DN281_c0_g1	2	99	162	10059	0.0123	0.475752	ns	0.785608	ns
ko03320	Organismal Systems	Endocrine system	PPAR signaling pathway	TRINITY_DN14773_c0_g1	1	99	67	10059	0.0149	0.48566	ns	0.785608	ns
ko04610	Organismal Systems	Immune system	Complement and coagulation cascades	TRINITY_DN2279_c2_g1	1	99	67	10059	0.0149	0.48566	ns	0.785608	ns
ko04070	Environmental Information Processing	Signal transduction	Phosphatidylinositol signaling system	TRINITY_DN3408_c0_g1, TRINITY_DN895_c0_g1	2	99	171	10059	0.0117	0.504318	ns	0.785608	ns
ko04022	Environmental Information Processing	Signal transduction	cGMP-PKG signaling pathway	TRINITY_DN3053_c0_g1	1	99	71	10059	0.0141	0.505746	ns	0.785608	ns
ko04360	Organismal Systems	Development and regeneration	Axon guidance	TRINITY_DN416_c1_g2	1	99	72	10059	0.0139	0.510645	ns	0.785608	ns
ko04024	Environmental Information Processing	Signal transduction	cAMP signaling pathway	TRINITY_DN3053_c0_g1	1	99	77	10059	0.013	0.534428	ns	0.80974	ns
ko04921	Organismal Systems	Endocrine system	Oxytocin signaling pathway	TRINITY_DN3301_c0_g2	1	99	83	10059	0.012	0.561462	ns	0.828908	ns
ko04144	Cellular Processes	Transport and catabolism	Endocytosis	TRINITY_DN18687_c0_g1, TRINITY_DN20827_c0_g2, TRINITY_DN855_c0_g1, TRINITY_DN7631_c0_g1, TRINITY_DN17789_c0_g3	5	99	512	10059	0.0098	0.571946	ns	0.828908	ns
ko04066	Environmental Information Processing	Signal transduction	HIF-1 signaling pathway	TRINITY_DN2279_c2_g1	1	99	94	10059	0.0106	0.607049	ns	0.836846	ns
ko04080	Environmental Information Processing	Signaling molecules and interaction	Neuroactive ligand-receptor interaction	TRINITY_DN1435_c0_g1	1	99	100	10059	0.01	0.629904	ns	0.836846	ns
ko04810	Cellular Processes	Cell motility	Regulation of actin cytoskeleton	TRINITY_DN3301_c0_g2, TRINITY_DN27244_c0_g1	2	99	216	10059	0.0093	0.631488	ns	0.836846	ns
ko04611	Organismal Systems	Immune system	Platelet activation	TRINITY_DN3301_c0_g2	1	99	101	10059	0.0099	0.633583	ns	0.836846	ns
ko04510	Cellular Processes	Cellular community - eukaryotes	Focal adhesion	TRINITY_DN3301_c0_g2, TRINITY_DN27244_c0_g1	2	99	227	10059	0.0088	0.658485	ns	0.836846	ns
ko00510	Metabolism	Glycan biosynthesis and metabolism	N-Glycan biosynthesis	TRINITY_DN2875_c0_g1	1	99	110	10059	0.0091	0.665107	ns	0.836846	ns
ko04910	Organismal Systems	Endocrine system	Insulin signaling pathway	TRINITY_DN1959_c1_g1	1	99	121	10059	0.0083	0.70001	ns	0.836846	ns
ko03030	Genetic Information Processing	Replication and repair	DNA replication	TRINITY_DN4723_c0_g2	1	99	128	10059	0.0078	0.72032	ns	0.836846	ns
ko04210	Cellular Processes	Cell growth and death	Apoptosis	TRINITY_DN3301_c0_g2	1	99	130	10059	0.0077	0.725868	ns	0.836846	ns
ko00620	Metabolism	Carbohydrate metabolism	Pyruvate metabolism	TRINITY_DN2037_c0_g1	1	99	132	10059	0.0076	0.731308	ns	0.836846	ns
ko04218	Cellular Processes	Cell growth and death	Cellular senescence	TRINITY_DN2279_c2_g1	1	99	132	10059	0.0076	0.731308	ns	0.836846	ns
ko04145	Cellular Processes	Transport and catabolism	Phagosome	TRINITY_DN3301_c0_g2, TRINITY_DN4483_c0_g1, TRINITY_DN3533_c0_g2	3	99	385	10059	0.0078	0.736424	ns	0.836846	ns
ko04015	Environmental Information Processing	Signal transduction	Rap1 signaling pathway	TRINITY_DN3301_c0_g2	1	99	139	10059	0.0072	0.749519	ns	0.842156	ns
ko00480	Metabolism	Metabolism of other amino acids	Glutathione metabolism	TRINITY_DN18976_c0_g1	1	99	146	10059	0.0068	0.766507	ns	0.851674	ns
ko04120	Genetic Information Processing	Folding, sorting and degradation	Ubiquitin mediated proteolysis	TRINITY_DN1468_c1_g1, TRINITY_DN9093_c1_g1	2	99	305	10059	0.0066	0.807152	ns	0.88698	ns
ko04142	Cellular Processes	Transport and catabolism	Lysosome	TRINITY_DN10_c0_g1, TRINITY_DN2022_c0_g1	2	99	315	10059	0.0063	0.821396	ns	0.892822	ns
ko03013	Genetic Information Processing	Translation	Nucleocytoplasmic transport	TRINITY_DN14_c1_g1, TRINITY_DN26754_c0_g1, TRINITY_DN13716_c0_g1	3	99	463	10059	0.0065	0.840573	ns	0.899454	ns
ko03040	Genetic Information Processing	Transcription	Spliceosome	TRINITY_DN3544_c1_g1, TRINITY_DN9093_c1_g1, TRINITY_DN17789_c0_g3	3	99	473	10059	0.0063	0.850997	ns	0.899454	ns
ko03018	Genetic Information Processing	Folding, sorting and degradation	RNA degradation	TRINITY_DN208_c0_g2	1	99	207	10059	0.0048	0.873654	ns	0.910057	ns
ko00240	Metabolism	Nucleotide metabolism	Pyrimidine metabolism	TRINITY_DN9909_c0_g1	1	99	221	10059	0.0045	0.890324	ns	0.917859	ns
ko03015	Genetic Information Processing	Translation	mRNA surveillance pathway	TRINITY_DN1019_c0_g2	1	99	241	10059	0.0041	0.910427	ns	0.929007	ns
ko04141	Genetic Information Processing	Folding, sorting and degradation	Protein processing in endoplasmic reticulum	TRINITY_DN5328_c0_g1, TRINITY_DN17789_c0_g3	2	99	505	10059	0.004	0.962613	ns	0.967656	ns
ko00230	Metabolism	Nucleotide metabolism	Purine metabolism	TRINITY_DN9909_c0_g1	1	99	341	10059	0.0029	0.967656	ns	0.967656	ns
